# Supplementary material
Source: ML conference proceedings conference paper supplement (https://openreview.net/forum?id=sHlZP3hP8E)
Supplement: supplementary_material [file attachment]

# MARINA MEETS MATRIX STEPSIZES: VARIANCE REDUCED DISTRIBUTED NON-CONVEX OPTIMIZATION

Anonymous authors

Paper under double-blind review

## ABSTRACT

Matrix-stepsized gradient descent algorithms have been demonstrated to exhibit superior efficiency in non-convex optimization compared to their scalar counterparts. The `det-CGD` algorithm, as introduced by Li et al. (2023), leverages matrix stepsizes to perform compressed gradient descent for non-convex objectives and matrix-smooth problems in a federated manner. The authors establish the algorithm’s convergence to a neighborhood of the weighted stationarity point under a convex condition for the symmetric and positive-definite stepsize matrix. In this paper, we propose a variance-reduced version of the `det-CGD` algorithm, incorporating the MARINA method. Notably, we establish theoretically and empirically, that `det-MARINA` outperforms both MARINA and the distributed `det-CGD` algorithms in terms of iteration and communication complexities.

## 1 INTRODUCTION

### 1.1 PROBLEM SETTING

We are focusing on optimizing the finite sum non-convex objective, as defined below:

$$\min_{x \in \mathbb{R}^d} f(x), \text{ where } f(x) := \frac{1}{n} \sum_{i=1}^n f_i(x). \quad (1)$$

In this context, each function  $f_i : \mathbb{R}^d \rightarrow \mathbb{R}$  is differentiable. It is assumed that  $f$  is lower bounded by  $f^*$ , while each individual function  $f_i$  is lower bounded by  $f_i^*$ . This type of objective function finds extensive application in various practical machine learning algorithms, which increase not only in terms of the data size but also in the model size and overall complexity as well. As a result, most neural network architectures result in highly non-convex empirical losses, which need to be minimized. In addition, it becomes computationally infeasible to train these models on one device, often excessively large, and one needs to redistribute them amongst different devices/clients. This redistribution results in a high communication overheads, which are often become the bottleneck in this framework.

In other words, we have the following setting. The data is partitioned into  $n$  clients, where the  $i$ -th client has access to the component function  $f_i$  and its derivatives. The clients are connected to each other through a central device, called the server. In this work, we are going to study iterative gradient descent-based algorithms that operate as follows: The clients compute the local gradients in parallel. Then they compress these gradients to reduce the communication cost and send them to the server in parallel. The server then aggregates these vectors and broadcasts the iterate update back to the clients. This meta-algorithm is called federated learning. We refer the readers to Konečný et al. (2016); McMahan et al. (2017); Kairouz et al. (2021) for a more thorough introduction to federated learning.

**Contributions.** In this paper, we introduce a federated learning algorithm named `det-MARINA`. This algorithm extends a recent method called `det-CGD` (Li et al., 2023), which aims to solve (1) using matrix stepsized gradient descent. Under the matrix smoothness assumption (Safaryan et al., 2021), they demonstrate that the matrix stepsized version of the Distributed Compressed Gradient Descent (Khairat et al., 2018) algorithm enhances communication complexity compared to its scalar counterpart. However, in their analysis, Li et al. (2023) show stationarity only within a certain neighborhood due to stochastic compressors. Our algorithm addresses this issue by incorporating a variance reduction scheme called MARINA (Gorbunov et al., 2021), which is an optimal federated learning algorithm in the non-convex setting. We establish theoretically and empirically, that `det-MARINA` outperforms both MARINA and

the distributed `det-CGD` algorithms in terms of iteration and communication complexities. In addition, we describe specific matrix stepsize choices, for which algorithm beats the scalar `MARINA` and distributed `det-CGD` both in theory and in practice.

## 1.2 BACKGROUND AND MOTIVATION

Ideally, for any given  $\varepsilon > 0$ , the goal is to find a point  $x_\varepsilon \in \mathbb{R}^d$  satisfying:

$$f(x) - f^* \geq \varepsilon.$$

However, it's important to note that in the general case, finding such an approximately global optimum is known to be NP-hard, as discussed in Jain et al. (2017); Danilova et al. (2022).

On the contrary, convex optimization problems are well-studied, and there exists an extensive body of literature on various methods. In the context of our work, methods based on gradient descent are of particular interest. When these methods are applied to non-convex objectives, they treat the function  $f$  as locally convex and aim to converge to a local minimum. Despite this simplification, such methods have gained popularity in practice due to their superior performance compared to other approaches for non-convex optimization, such as convex relaxation-based methods (Tibshirani, 1996; Cai et al., 2010).

**Stochastic Gradient Descent.** Arguably, one of the most prominent meta-methods for tackling non-convex optimization problems is stochastic gradient descent (SGD). The formulation of SGD is presented as the following iterative algorithm:

$$x^{k+1} = x^k - \gamma g^k. \tag{SGD}$$

Here,  $g^k \in \mathbb{R}^d$  serves as a stochastic estimator of the gradient  $\nabla f(x^k)$ . SGD essentially mimics the classical gradient descent algorithm, and recovers it when  $g^k = \nabla f(x^k)$ . In this scenario, the method approximates the objective function  $f$  using a linear function and takes a step of size  $\gamma$  in the direction that maximally reduces this approximation. When the stepsize is sufficiently small, and the function  $f$  is suitably smooth, it can be demonstrated that the function value decreases, as discussed in Bubeck et al. (2015); Gower et al. (2019).

However, computing the full gradient can often be computationally expensive. In such cases, stochastic approximations of the gradient come into play. Stochastic estimators of the gradient can be employed for various purposes, leading to the development of different methods. These include stochastic batch gradient descent (Nemirovski et al., 2009; Johnson & Zhang, 2013; Defazio et al., 2014), randomized coordinate descent (Nesterov, 2012; Wright, 2015), and compressed gradient descent (Alistarh et al., 2017; Khirirat et al., 2018; Mishchenko et al., 2019). The latter, compressed gradient descent, holds particular relevance to this paper, and we will delve into a more detailed discussion of it in subsequent sections.

**Second order methods.** The stochastic gradient descent is considered as a first-order method as it uses only the first order derivative information. Although being immensely popular, the first order methods are not always the most optimal. Not surprisingly, using higher order derivatives in deciding update direction can yield to faster algorithms. A simple instance of such algorithms is the Newton Star algorithm (Islamov et al., 2021):

$$x^{k+1} = x^k - (\nabla^2 f(x^*))^{-1} \nabla f(x^k), \tag{NS}$$

where  $x^*$  is the minimum point of the objective function. The authors establish that under specific conditions, the algorithm's convergence to the unique solution  $x^*$  in the convex scenario occurs at a local quadratic rate. Nonetheless, its practicality is limited since we do not have prior knowledge of the Hessian matrix at the optimal point. Despite being proposed recently, the Newton-Star algorithm gives a deeper insight on the generic Newton method (Gragg & Tapia, 1974; Miel, 1980; Yamamoto, 1987):

$$x^{k+1} = x^k - \gamma (\nabla^2 f(x^k))^{-1} \nabla f(x^k). \tag{NM}$$

Here, the unknown Hessian of the Newton-Star algorithm, is estimated progressively along the iterations. The latter causes elevated computational costs, as the inverting a large square matrix is expensive. As an alternative, quasi-Newton methods replace the inverse of the Hessian at the iterate with a computationally cheaper estimate (Broyden, 1965; Dennis & Moré, 1977; Al-Baali & Khalfan, 2007; Al-Baali et al., 2014).

**Fixed matrix stepsizes.** The `det-CGD` algorithm falls into this framework of the second order methods as well. Proposed by Li et al. (2023)<sup>1</sup>, the algorithm suggests using a uniform “upper bound” on the inverse Hessian matrix. Assuming matrix smoothness of the objective (Safaryan et al., 2021), they replace the scalar stepsize with a positive definite matrix  $D$ . The algorithm is given as follows:

$$x^{k+1} = x^k - DS^k \nabla f(x^k). \quad (\text{det-CGD})$$

- Here,  $D$  plays the role of the stepsize. It essentially uniformly upper bounds the inverse Hessian. The standard SGD is a particular case of this method, as the scalar stepsize  $\gamma$  can be seen as a matrix  $\gamma I_d$ , where  $I_d$  is the  $d$ -dimensional identity matrix. An advantage of using a matrix stepsize is more evident if we take the perspective of the second order methods. Indeed, the scalar stepsize  $\gamma I_d$  uniformly estimates the largest eigenvalue of the Hessian matrix, while  $D$  can capture the Hessian more accurately. The authors show both theoretical and empirical improvement that comes with matrix stepsizes.
- $S^k$  is a positive semi-definite stochastic sketch matrix, that is unbiased:  $\mathbb{E}[S^k] = I_d$ . We notice that `det-CGD` can be seen as a matrix stepsize instance of `SGD`, with  $g^k = S^k \nabla f(x^k)$ . The sketch matrix can be seen as a linear compressing operator, hence the name of the algorithm: `CGD` (Compressed Gradient Descent) (see Alistarh et al. (2017); Khirirat et al. (2018)). A commonly used example of such a compressor is the `Rand- $k$`  compressor. This compressor randomly selects  $m$  entries from its input and scales them using a scalar multiplier to ensure an unbiased estimation. By adopting this approach, instead of using all  $d$  coordinates of the gradient, only a subset of size  $m$  is communicated. Formally, `rand- $\tau$`  is defined as follows:

$$S = \frac{d}{\tau} \sum_{j=1}^{\tau} e_{i_j} e_{i_j}^{\top}. \quad (2)$$

Here,  $e_{i_j}$  denotes the  $i_j$ -th standard basis vector in  $\mathbb{R}^d$ . For a more comprehensive understanding of compression techniques, we refer to the paper by Safaryan et al. (2022b).

**The neighborhood of the distributed `det-CGD1`.** The distributed version of `det-CGD` follows the standard federated learning paradigm (McMahan et al., 2017). The pseudocode of the method, as well as the convergence result of Li et al. (2023), can be found in the appendix. Informally, their convergence result can be written as

$$\min_{k=1, \dots, K} \mathbb{E}[\|\nabla f(x^k)\|_D^2] \leq \mathcal{O}\left(\frac{(1+\alpha)^K}{K}\right) + \mathcal{O}(\alpha), \quad (3)$$

where  $\alpha > 0$  is a constant that can be controlled. The crucial insight from this result is that the error bound doesn’t diminish as the number of iterations increases. In fact, by controlling  $\alpha$  and considering a large  $K$ , it’s impossible to make the second term smaller than  $\varepsilon$ . This implies that the algorithm converges to a certain neighborhood surrounding the (local) optimum. This phenomenon is a common occurrence in `SGD` and is primarily attributable to the variance associated with the stochastic gradient estimator. In the case of `det-CGD` the stochasticity comes from the sketch  $S^k$ .

**Variance reduction.** To eliminate this neighborhood, various techniques for reducing variance are employed. One of the simplest techniques applicable to `CGD` is gradient shifting. By replacing  $S^k \nabla f(x^k)$  with  $S^k (\nabla f(x^k) - \nabla f(x^*)) + \nabla f(x^*)$ , the neighborhood effect is removed from the general `CGD`. This algorithm is an instance of a more commonly known method called `SGD $\star$`  (Gower et al., 2020). However, since the exact optimum  $x^*$  is typically unknown, this technique encounters similar challenges as the Newton-Star algorithm mentioned earlier. Fortunately, akin to quasi-Newton methods, one can employ methods that iteratively learn the optimal shift (Shulgin & Richtárik, 2022).

A line of research focuses on variance reduction for `CGD` based on this insight. To mitigate the neighborhood effect in the distributed version of `CGD`, denoted as `det-CGD1`, we apply a technique called `MARINA` (Gorbunov et al., 2021). `MARINA` cleverly combines the general shifting technique with loopless variance reduction techniques (Qian et al., 2021). This approach introduces an alternative gradient estimator specifically designed for the federated learning setting. Thanks to its structure, it allows to establish an upper bound on the stationarity error that diminishes significantly with a large number of iterations. In this paper, we construct the analog of the this algorithm called `det-MARINA`, using matrix stepsizes and sketch gradient compressors. For this new method, we prove a convergence guarantee similar to (3) that without a neighborhood term.

<sup>1</sup>In the original paper, the algorithm is referred to as `det-CGD`, as there is a variant of the same algorithm named `det-CGD2`. Since we are going to use only the first one and our framework is applicable to both, we will remove the number in the end for the sake of brevity.

### 1.3 PRIOR WORK

Numerous effective convex optimization techniques have been adapted for application in non-convex scenarios. Here’s a selection of these techniques, although it’s not an exhaustive list: adaptivity (Dvinskikh et al., 2019; Zhang et al., 2020b), variance reduction (J Reddi et al., 2016; Li et al., 2021), and acceleration (Guminov et al., 2019). Of particular relevance to our work is the paper by Khaled & Richtárik (2020), which introduces a unified approach for analyzing stochastic gradient descent for non-convex objectives. A comprehensive overview of non-convex optimization can be found in (Jain et al., 2017; Danilova et al., 2022).

An illustrative example of a matrix stepsized method is Newton’s method, which has been a long-standing favorite in the optimization community (Gragg & Tapia, 1974; Miel, 1980; Yamamoto, 1987). However, the computational complexity involved in computing the stepsize as the inverse of the Hessian of the current iteration is substantial. Instead, quasi-Newton methods employ a readily computable estimator to replace the inverse Hessian (Broyden, 1965; Dennis & Moré, 1977; Al-Baali & Khalfan, 2007; Al-Baali et al., 2014). An important direction of research that is relevant to our work, studies distributed second order methods. Here is a non-exhaustive list of papers in this area: Wang et al. (2018); Crane & Roosta (2019); Zhang et al. (2020a); Islamov et al. (2021); Alimisis et al. (2021); Safaryan et al. (2022a).

The Distributed Compressed Gradient Descent (DCGD) algorithm, initially proposed by Khirirat et al. (2018), has seen improvements in various aspects, as documented in works such as (Li et al., 2020; Horváth et al., 2022). Its variance reduced version with gradients shifts was studied by Shulgin & Richtárik (2022) in the (strongly) convex setting. Additionally, there exists a substantial body of literature on other federated learning algorithms employing unbiased compressors (Alistarh et al., 2017; Mishchenko et al., 2019; Gorbunov et al., 2021; Mishchenko et al., 2022; Maranjyan et al., 2022; Horváth et al., 2023).

Variance reduction techniques have gained significant attention in the context of stochastic batch gradient descent that is prevalent in machine learning. Numerous algorithms have been developed in this regard, including well-known ones like SVRG (Johnson & Zhang, 2013), SAG (Schmidt et al., 2017), SDCA (Richtárik & Takáč, 2014), SAGA (Defazio et al., 2014), MISO (Mairal, 2015), and Katyusha (Allen-Zhu, 2017). An overview of more advanced methods can be found in Gower et al. (2020). Notably, SVRG and Katyusha have been extended with loopless variants, namely L-SVRG and L-Katyusha (Kovalev et al., 2020; Qian et al., 2021). These loopless versions streamline the algorithms by eliminating the outer loop and introducing a biased coin-flip mechanism at each step. This simplification eases both the algorithms’ structure and their analyses, while preserving their worst-case complexity bounds. L-SVRG, in particular, offers the advantage of setting the exit probability from the outer loop independently of the condition number, thus, enhancing both robustness and practical efficiency.

This technique of coin flipping allows to obtain variance reduction for the CGD algorithm. A relevant example is the DIANA algorithm proposed by Mishchenko et al. (2019). Its convergence was proved both in the convex and non-convex cases. Later, MARINA (Gorbunov et al., 2021) obtained the optimal convergence rates, improving in communication complexity compared to all previous first order methods. Finally, there is a line of work developing variance reduction in the federated setting using other methods and techniques (Chraïbi et al., 2019; Hanzely & Richtárik, 2020; Dinh et al., 2020; Peng et al., 2022; Tyurin & Richtárik, 2022).

### 1.4 ORGANIZATION OF THE PAPER

The rest of the paper is organized as follows. Section 2 discusses the general mathematical framework. In particular, Section 2.2 lists the assumptions the we use later in the analysis and puts them in perspective with existing work. Section 3 presents the det-MARINA algorithm as well as the main theorem that guarantees convergence to a stationary point.. We show the superior theoretical performance of our algorithm compared to MARINA and det-CGD in Section 4. The details on the experimental setup and more plots can be found in the Appendix. Section 5 contains several plots, which confirm our theoretical findings. We conclude the main section of the paper in Section 6.

## 2 MATHEMATICAL FRAMEWORK



## 2.1 NOTATIONS

The standard Euclidean norm on  $\mathbb{R}^d$  is defined as  $\|\cdot\|$ . We use  $\mathbb{S}_{++}^d$  (resp.  $\mathbb{S}_+^d$ ) to denote the positive definite (resp. semi-definite) cone of dimension  $d$ .  $\mathbb{S}^d$  is used to denote all symmetric matrices of dimension  $d$ . We use the notation  $\mathbf{I}_d$  to denote the identity matrix of size  $d \times d$ , and  $\mathbf{O}_d$  to denote the zero matrix of size  $d \times d$ . Given  $\mathbf{Q} \in \mathbb{S}_{++}^d$  and  $x \in \mathbb{R}^d$ ,  $\|x\|_{\mathbf{Q}} := \sqrt{x^\top \mathbf{Q} x} = \sqrt{\langle x, \mathbf{Q} x \rangle}$ , where  $\langle \cdot, \cdot \rangle$  is the standard Euclidean inner product on  $\mathbb{R}^d$ . For a matrix  $\mathbf{A} \in \mathbb{S}^d$ , we use  $\lambda_{\max}(\mathbf{A})$  (resp.  $\lambda_{\min}(\mathbf{A})$ ) to denote the largest (resp. smallest) eigenvalue of the matrix  $\mathbf{A}$ . For a function  $f : \mathbb{R}^d \mapsto \mathbb{R}$ , its gradient and its Hessian at a point  $x \in \mathbb{R}^d$  are respectively denoted as  $\nabla f(x)$  and  $\nabla^2 f(x)$ . For the sketch matrices  $\mathbf{S}_i^k$  used in the algorithm, we use the superscript  $k$  to denote the iteration and subscript  $i$  to denote the client, the matrix  $\mathbf{S}_i^k$  is thus sampled for client  $i$  in the  $k$ -th iteration from sine distribution  $\mathcal{S}$ . For any matrix  $\mathbf{A} \in \mathbb{S}^d$ , we use the notation  $\text{diag}(\mathbf{A}) \in \mathbb{S}^d$  to denote the diagonal of matrix  $\mathbf{A}$ .

## 2.2 ASSUMPTIONS AND CONDITIONS

In this section we present the assumptions we needed in order to analyze det-MARINA.

**Assumption 1.** (Lower Bound) *There exists  $f^* \in \mathbb{R}$  such that,  $f(x) \geq f^*$  for all  $x \in \mathbb{R}^d$ .*

This is a standard assumption in optimization, as otherwise the problem of minimizing the objective would not be correct mathematically. The same assumption is used in MARINA. We then need a matrix version of  $L$ -smoothness in order to proceed. Previously, Safaryan et al. (2021), Wang et al. (2022) used  $\mathbf{L}$ -matrix smoothness in the (strongly) convex setting to analyze some variants of the DCGD. Li et al. (2023) provided the analysis of sketched gradient descent under this assumption in the non-convex case. The assumption is formulated as follows,

**Assumption 2.** ( $\mathbf{L}_i$ -matrix smoothness) *Assume that each function  $f_i$  is  $\mathbf{L}_i$ -smooth for all  $i \in [n] = \{1, 2, 3, \dots, n\}$ . That is for each function  $f_i$ , the following inequality holds:*

$$f_i(x) \leq f_i(y) + \langle \nabla f_i(y), x - y \rangle + \frac{1}{2} \|x - y\|_{\mathbf{L}_i}^2. \quad (4)$$

However, we do not want to use Assumption 2 in the analysis, as in the analysis of det-MARINA one needs to upper bound the squared difference of gradients by a multiple of squared difference of iterate. The latter is not implied from Assumption 2 for non-convex functions, as opposed to the convex ones. Instead, we introduce the matrix version of the  $L$ -Lipschitz continuous gradient assumption used in the analysis for MARINA of Gorbunov et al. (2021). Note that the "smoothness" the authors are referring to is indeed the Lipschitz continuous gradient assumption, instead of the standard smoothness assumption (Nesterov, 2003).

**Definition 1.** ( $\mathbf{L}$ -Lipschitz Gradient) *Assume that  $f : \mathbb{R}^d \rightarrow \mathbb{R}$  is a continuously differentiable function and matrix  $\mathbf{L} \in \mathbb{S}_{++}^d$ . We say the gradient of  $f$  is  $\mathbf{L}$ -Lipschitz if*

$$\|\nabla f(x) - \nabla f(y)\|_{\mathbf{L}^{-1}} \leq \|x - y\|_{\mathbf{L}}, \quad \forall x, y \in \mathbb{R}^d. \quad (5)$$

This condition can be interpreted as follows. The gradient of  $f$  naturally belongs to the dual space of  $\mathbb{R}^d$ , as it is defined as a linear functional on  $\mathbb{R}^d$ . In the scalar case,  $\ell_2$ -norm is self-dual, thus (5) reduces to the standard Lipschitz continuity of the gradient. However, with the matrix smoothness assumption, we are using the  $\mathbf{L}$ -norm for the iterates, which naturally induces the  $\mathbf{L}^{-1}$ -matrix norm for the gradients in the dual space. This insight, which is originally presented by Nemirovski & Yudin (1983), plays a key role in our analysis.

The following proposition provides us with a method to verify (5).

**Proposition 1.** *Given twice continuously differentiable function  $f : \mathbb{R}^d \mapsto \mathbb{R}$  with bounded Hessian,*

$$\nabla^2 f(x) \preceq \mathbf{L}, \quad (6)$$

*where  $\mathbf{L} \in \mathbb{S}_{++}^d$  and the generalized inequality holds for any  $x \in \mathbb{R}^d$ . Then  $f$  satisfies (5) with the matrix  $\mathbf{L}$ .*

Despite, being equivalent in the convex setting, (5) is slightly stronger compared to Assumption 2 in the non-convex case. See Appendix B for the properties of matrix smoothness. However, in practical terms, verifying Proposition 1 serves as the pipeline for confirming both conditions. Finally, we check that (5) is indeed an extension of the standard Lipschitz gradient assumption, as illustrated by the following remark.

**Remark 1.** If we let  $\mathbf{L} = L\mathbf{I}_d$ , then (5) reduces to the standard  $L$ -Lipschitz continuous gradient assumption.

In the following, we will assume that (5) is satisfied for component functions  $f_i$ .

**Assumption 3.** Each function  $f_i$  is  $L_i$ -gradient Lipschitz, while  $f$  is  $L$ -gradient Lipschitz.

In fact, the second half of the assumption is a consequence of the first one. Below, we formalize this claim.

**Proposition 2.** If  $f_i$  is  $L_i$ -gradient Lipschitz for every  $i = 1, \dots, n$ , then function  $f$  has  $L$ -Lipschitz gradient with  $L \in \mathbb{S}_{++}^d$  satisfying

$$\frac{1}{n} \sum_{i=1}^n \lambda_{\max}(\mathbf{L}^{-1}) \cdot \lambda_{\max}(\mathbf{L}_i) \cdot \lambda_{\max}(\mathbf{L}_i \mathbf{L}^{-1}) = 1. \quad (7)$$

Nevertheless, the matrix  $\mathbf{L}$  found according to Proposition 2 is only an estimate. In principle, there might exist a better  $L_f \preceq \mathbf{L}$  such that  $f$  has  $L_f$ -Lipschitz gradient.

**Remark 2.** In the scalar case, where  $\mathbf{L} = L\mathbf{I}_d$ ,  $\mathbf{L}_i = L_i\mathbf{I}_d$ , the relation becomes

$$L^2 = \frac{1}{n} \sum_{i=1}^n L_i^2.$$

This corresponds to the statement in Assumption 1.2 in Gorbunov et al. (2021).

### 3 THE MAIN RESULT

In this section, we present our algorithm `det-MARINA` with the main convergence result. In addition, we compute both iteration and communication complexities and show that they are better than the ones of the `MARINA` algorithm, which serves as the prototype of our method. Along the iterations of the algorithms, we are constructing a sequence of vectors  $g^k$  which are stochastic estimators of  $\nabla f(x^k)$ . At each iteration, the server samples a Bernoulli random variable (coin flip)  $c_k$  and broadcasts it in parallel to the clients, along with the current gradient estimate  $g^k$ . Each client, then, does a `det-CGD`-type update with the stepsize  $D$  and a gradient estimate  $g^k$ . The next gradient estimate  $g^{k+1}$  is then computed. With a low probability, that is when  $c_k = 1$ , we take the  $g^{k+1}$  to be the full gradient  $\nabla f(x^{k+1})$ . Otherwise, we update it using the compressed gradient differences at each client. Below, is the pseudocode of the algorithm.

---

#### Algorithm 1 `det-MARINA`

---

```

1: Input: starting point  $x^0$ , stepsize matrix  $D$ , probability  $p \in (0, 1]$ , number of iterations  $K$ 
2: Initialize  $g^0 = \nabla f(x^0)$ 
3: for  $k = 0, 1, \dots, K - 1$  do
4:   Sample  $c_k \sim \text{Be}(p)$ 
5:   Broadcast  $g^k$  to all workers
6:   for  $i = 1, 2, \dots$  in parallel do
7:      $x^{k+1} = x^k - D \cdot g^k$ 
8:     Set  $g_i^{k+1} = \begin{cases} \nabla f_i(x^{k+1}) & \text{if } c_k = 1 \\ g^k + \mathbf{S}_i^k (\nabla f_i(x^{k+1}) - \nabla f_i(x^k)) & \text{if } c_k = 0 \end{cases}$ 
9:   end for
10:   $g^{k+1} = \frac{1}{n} \sum_{i=1}^n g_i^{k+1}$ 
11: end for
12: Return:  $\tilde{x}^K$  chosen uniformly at random from  $\{x^k\}_{k=0}^{K-1}$ 

```

---

In the following theorem, we formulate the main result of this paper, which guarantees the convergence of Algorithm 1 under the abovementioned assumptions.

**Theorem 1.** Assume that Assumptions 1 and 3 hold, and the following condition on stepsize matrix  $D \in \mathbb{S}_{++}^d$  holds,

$$D^{-1} \succeq \left( \frac{(1-p) \cdot R(D, \mathcal{S})}{np} + 1 \right) L, \quad (8)$$

where

$$R(\mathbf{D}, \mathcal{S}) := \frac{1}{n} \sum_{i=1}^n \lambda_{\max} \left( \mathbb{E} [\mathbf{S}_i^k \mathbf{D} \mathbf{S}_i^k] - \mathbf{D} \right) \cdot \lambda_{\max}(\mathbf{L}_i) \cdot \lambda_{\max} \left( \mathbf{L}^{-\frac{1}{2}} \mathbf{L}_i \mathbf{L}^{-\frac{1}{2}} \right). \quad (9)$$

Then, after  $K$ -iterations of  $\det$ -MARINA, we have

$$\mathbb{E} \left[ \left\| \nabla f(\tilde{x}^K) \right\|_{\frac{\mathbf{D}}{\det(\mathbf{D})^{1/d}}}^2 \right] \leq \frac{2(f(x^0) - f^*)}{\det(\mathbf{D})^{1/d} \cdot K}. \quad (10)$$

Here,  $\tilde{x}^K$  is chosen uniformly randomly from the first  $K$  iterates of the algorithm.

Below we state several remarks regarding the interpretation of theorem.

**Remark 3.** We notice that the the right-hand side of the algorithm vanishes with the number of iterations, thus solving the issue of the distributed  $\det$ -CGD. Therefore,  $\det$ -MARINA is indeed the variance reduced version of  $\det$ -CGD in the distributed setting and has better convergence guarantees.

**Remark 4.** Theorem 1 implies the following iteration complexity for the algorithm. In order to get an  $\varepsilon^2$  stationarity error, the algorithm requires  $K$  iterations, with

$$K \geq \frac{2(f(x^0) - f^*)}{\det(\mathbf{D})^{1/d} \cdot \varepsilon^2}.$$

**Remark 5.** In the case where no compression is applied, that is we have  $\mathbf{S}_i^k = \mathbf{I}_d$ , the condition (8) reduces to

$$\mathbf{D} \preceq \mathbf{L}^{-1}. \quad (11)$$

The latter is due to  $\mathbb{E} [\mathbf{S}_i^k \mathbf{D} \mathbf{S}_i^k] = \mathbf{D}$ , which results in  $R(\mathbf{D}, \mathcal{S}) = 0$ . This is expected, since in the deterministic case  $\det$ -MARINA reduces to GD with matrix stepsize.

The convergence condition and rate of matrix stepsize GD can be found in Li et al. (2023). Below we do a sanity check to verify that the convergence condition for scalar MARINA can be obtained.

**Remark 6.** Let us consider the scalar case. That is

$$\mathbf{L}_i = L_i \mathbf{I}_d, \quad \mathbf{L} = L \mathbf{I}_d, \quad \mathbf{D} = \gamma \mathbf{I}_d \quad \text{and} \quad \omega = \lambda_{\max} \left( \mathbb{E} \left[ (\mathbf{S}_i^k)^\top \mathbf{S}_i^k \right] \right) - 1. \quad (12)$$

Then, the condition (8) reduces to

$$\frac{\gamma(1-p)\omega L^2}{np} - \frac{1}{\gamma} + L \leq 0. \quad (13)$$

One can check that the below bound implies (13)

$$\gamma \leq \left[ L \left( 1 + \sqrt{\frac{(1-p)\omega}{pn}} \right) \right]^{-1}.$$

The latter coincides with the stepsize condition of the convergence result of scalar MARINA. Now let us look at the right-hand side of (10). We notice that it decreases in terms of the determinant of the stepsize matrix. Therefore, one needs to solve the following optimization problem to find the optimal stepsize:

$$\begin{aligned} & \text{minimize} && \log \det(\mathbf{D}^{-1}) \\ & \text{subject to} && \mathbf{D} \text{ satisfying (8)}. \end{aligned}$$

The solution of this constrained minimization problem on  $\mathbb{S}_{++}^d$  is not explicit. In theory, one may show that the constraint (8) is convex and attempt to solve the problem numerically. However, as stressed by Li et al. (2023), the similar stepsize condition for  $\det$ -CGD is not easily computed using solvers like CVXPY (Diamond & Boyd, 2016). Instead, we may relax the problem to certain linear subspaces of  $\mathbb{S}_{++}^d$ . In particular, we fix a matrix  $\mathbf{W} \in \mathbb{S}_{++}^d$ , and define  $\mathbf{D} := \gamma \mathbf{W}$ . Then, the condition on the matrix  $\mathbf{D}$  becomes a condition for the scalar  $\gamma$ , which is given in the following corollary.

**Corollary 1.** Let  $\mathbf{W} \in \mathbb{S}_{++}^d$ , defining  $\mathbf{D} := \gamma \cdot \mathbf{W}$ , where  $\gamma \in \mathbb{R}_+$ . then the condition in (8) reduces to the following condition on  $\gamma$

$$\gamma \leq \frac{2\lambda_{\mathbf{W}}}{1 + \sqrt{1 + 4\alpha\beta \cdot \Lambda_{\mathbf{W},\mathcal{S}}\lambda_{\mathbf{W}}}}, \quad (14)$$

where  $\Lambda_{\mathbf{W},\mathcal{S}} = \lambda_{\max}(\mathbb{E}[\mathbf{S}_i^k \mathbf{W} \mathbf{S}_i^k] - \mathbf{W})$ ,  $\lambda_{\mathbf{W}} = \lambda_{\max}^{-1}(\mathbf{W}^{\frac{1}{2}} \mathbf{L} \mathbf{W}^{\frac{1}{2}})$  and

$$\alpha = \frac{1-p}{np}; \quad \beta = \frac{1}{n} \sum_{i=1}^n \lambda_{\max}(\mathbf{L}_i) \cdot \lambda_{\max}(\mathbf{L}^{-1} \mathbf{L}_i). \quad (15)$$

This means that for every fixed  $\mathbf{W}$ , we can find the optimal scaling  $\gamma$ . In the next section, we will use this corollary to compute the communication complexity of our algorithm and to compare it with MARINA.

## 4 COMPARISON OF COMPLEXITIES

The following corollary states the iteration complexity for  $\det$ -MARINA with  $\mathbf{W} = \mathbf{L}^{-1}$ .

**Corollary 2.** If we take  $\mathbf{W} = \mathbf{L}^{-1}$ , then the condition (14) on  $\gamma$  is given by

$$\gamma \leq \frac{2}{1 + \sqrt{1 + 4\alpha\beta \cdot \Lambda_{\mathbf{L}^{-1},\mathcal{S}}}}. \quad (16)$$

In order to satisfy,  $\varepsilon$ -stationarity, that is  $\mathbb{E}[\|\nabla f(\tilde{x}^K)\|_{\mathbf{D}/\det(\mathbf{D})^{1/d}}^2] \leq \varepsilon^2$ , we require

$$K \geq K_0 = \mathcal{O}\left(\frac{\Delta_0 \cdot \det(\mathbf{L})^{\frac{1}{d}}}{\varepsilon^2} \cdot \left(1 + \sqrt{1 + 4\alpha\beta \cdot \Lambda_{\mathbf{L}^{-1},\mathcal{S}}}\right)\right), \quad (17)$$

where  $\Delta_0 = f(x^0) - f(x^*)$ . Moreover, this iteration complexity is always better than the one of MARINA.

The proof can be found in the Appendix. In fact, we can show that in cases where we fix  $\mathbf{W} = \mathbf{I}_d$  and  $\mathbf{W} = \text{diag}^{-1}(\mathbf{L})$ , the same conclusion also holds, relevant details can be found in Appendix C.2. This essentially means that  $\det$ -MARINA can always have a "larger" stepsize compared to MARINA, which leads to a better iteration complexity. In addition, because we are using the same compressor for those two algorithms, the communication complexity of  $\det$ -MARINA is also provably better than that of MARINA.

We also give an analysis of the communication complexity of our algorithm as our main concern here is the communication complexity. We first give the following definition on the expected density, which is used to analyze the communication complexity in Gorbunov et al. (2021). The original definition is given for any unbiased compressors. However, we are focusing on sketches in this paper, so we only restrict the definition to sketches.

**Definition 2.** For a given sketch matrix  $\mathbf{S} \in \mathbb{S}_+^d$ , the expected density is defined as

$$\zeta_{\mathbf{S}} = \sup_{x \in \mathbb{R}^d} \mathbb{E}[\|\mathbf{S}x\|_0], \quad (18)$$

where  $\|x\|_0$  denotes the number of non-zero components of  $x \in \mathbb{R}^d$ .

We can easily obtain the expected density for some commonly seen sketches, for example for  $\text{rand-}\tau$  sketches, we have  $\zeta_{\text{rand-}\tau} = \tau$ . The latter means, that in average the clients communicate  $\tau$  coordinates at each iteration. Below, we state the communication complexity of  $\det$ -MARINA with  $\mathbf{D}_{\mathbf{L}^{-1}}^*$  and the  $\text{rand-}\tau$  compressor.

**Corollary 3.** Assume that we are using sketch  $\mathbf{S} \sim \mathcal{S}$  with expected density  $\zeta_{\mathcal{S}}$ , suppose we are running  $\det$ -MARINA with probability  $p$  and we use the optimal stepsize matrix with respect to  $\mathbf{W} = \mathbf{L}^{-1}$ , then the overall communication complexity here is given by  $\mathcal{O}((Kp+1)d + (1-p)K\zeta_{\mathcal{S}})$ . Specifically, if we pick  $p = \zeta_{\mathcal{S}}/d$ , then the communication complexity is given by

$$\mathcal{O}\left(d + \frac{\Delta_0 \cdot \det(\mathbf{L})^{\frac{1}{d}}}{\varepsilon^2} \cdot \left(\zeta_{\mathcal{S}} + \sqrt{\frac{\beta \cdot \Lambda_{\mathbf{L}^{-1},\mathcal{S}}}{n} \cdot \zeta_{\mathcal{S}}(d - \zeta_{\mathcal{S}})}\right)\right). \quad (19)$$

Notice that in case where no compression is applied, the communication complexity (resp. iteration complexity) reduces to  $\mathcal{O}(d\Delta_0 \cdot \det(\mathbf{L})^{\frac{1}{d}}/\varepsilon^2)$  (resp.  $\mathcal{O}(\Delta_0 \cdot \det(\mathbf{L})^{\frac{1}{d}}/\varepsilon^2)$ ), this coincides with the rate of matrix stepsize GD (see Li et al. (2023)). This implies that the dependence on  $\varepsilon$  is not possible to be improved further since GD is optimal in first order methods Carmon et al. (2020).

## 5 EXPERIMENTS

In this section, we conduct experimental comparisons between `det-MARINA` and the current state-of-the-art methods. The results presented in both Figure 1(a) and Figure 2 confirm that `det-MARINA` indeed surpasses MARINA in terms of iteration complexity and communication complexity.

Compared to `det-CGD`, which serves as the non-variance-reduced counterpart of `det-MARINA`, our algorithm demonstrates superior performance, as evident from Figure 1(c) and Figure 4, as predicted by our theory. An overall comparison between two non-variance-reduced methods and two variance-reduced methods is presented in Figure 1(b). This plot highlights the significance of combining variance reduction techniques with matrix stepsize and matrix smoothness for improved optimization performance.

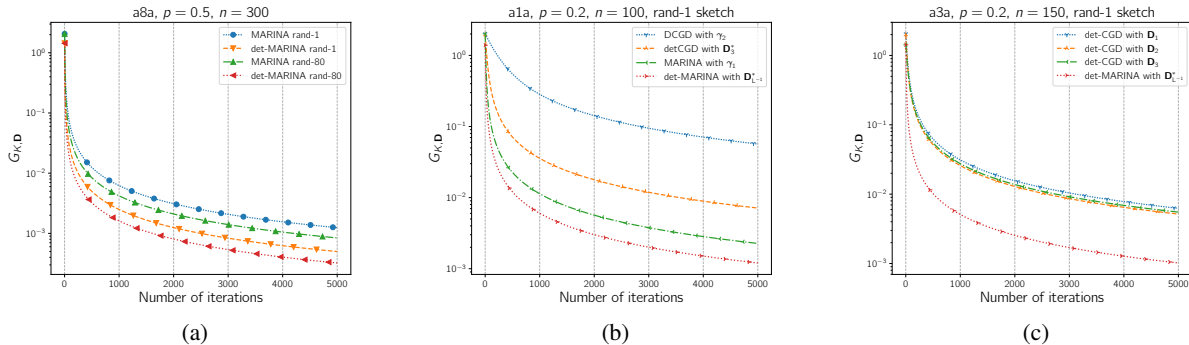

Figure 1: These plots confirm that `det-MARINA` improves on all previous algorithms, including DCGD, `det-CGD` and MARINA. For more plots and the details of the experimental setup can be found in Appendix G.

## 6 CONCLUSION

We proposed `det-MARINA`, as variance reduced alternative to `det-CGD`, and we show that it outperforms both `det-CGD` and MARINA. There are numerous directions to extend the matrix-stepsized non-convex algorithms. Here we list some of them.

**Extension to `det-CGD2`.** A variant of `det-CGD`, called `det-CGD2`, was also proposed by Li et al. (2023). This algorithm, has the same structure as (`det-CGD`) with the sketch and stepsize interchanged. It was shown, that this algorithm has explicit stepsize condition in the single node setting. In Appendix E, we propose the variance reduced extension of the distributed `det-CGD2`.

**Extension to DASHA.** However, besides MARINA, there are other existing techniques of performing variance reduction in a non-convex setting for compressed gradient methods, such as DASHA, which offers better practicality, as it always sends compressed gradients and do not need synchronize among all the nodes, according to Tyurin & Richtárik (2022). We want to emphasize here the way we extend `det-CGD` to its variance-reduced counterpart is not limited to MARINA type variance reduction. The same techniques used in the proof are also applicable if we want to extend `det-CGD` to its DASHA type variance reduced counterpart. However, we leave this as a future work.

**Other directions.** i) In this paper, we have only considered (linear) sketches as the compression operator. However, there exists a variety of compressors which are useful in practice that do not fall into this category. Extending `det-CGD` and `det-MARINA` for general unbiased compressors is a promising future work direction. ii) Our motivation for using a matrix stepsize is partially inspired by second-order methods, where matrix stepsize  $D$  roughly estimates the inverse of the Hessian. Additionally, given recent successes with adaptive stepsizes (e.g., Loizou et al. (2021); Orvieto et al. (2022); Schaipp et al. (2023)), designing an adaptive matrix stepsize tailored to our case could be viable. iii) Finally, recent advances in federated learning (Philippenko & Dieuleveut, 2020; Gruntkowska et al., 2022) have shown that server-to-client compression is important. Extending our results for the bidirectional federated learning is worth human attention.



## REFERENCES

- Mehiddin Al-Baali and H Khalfan. An overview of some practical quasi-newton methods for unconstrained optimization. *Sultan Qaboos University Journal for Science [SQUJS]*, 12(2):199–209, 2007.
- Mehiddin Al-Baali, Emilio Spedicato, and Francesca Maggioni. Broyden’s quasi-Newton methods for a nonlinear system of equations and unconstrained optimization: a review and open problems. *Optimization Methods and Software*, 29(5):937–954, 2014.
- Foivos Alimisis, Peter Davies, and Dan Alistarh. Communication-efficient distributed optimization with quantized preconditioners. In *International Conference on Machine Learning*, pp. 196–206. PMLR, 2021.
- Dan Alistarh, Demjan Grubic, Jerry Li, Ryota Tomioka, and Milan Vojnovic. QSGD: Communication-efficient SGD via gradient quantization and encoding. *Advances in neural information processing systems*, 30, 2017.
- Zeyuan Allen-Zhu. Katyusha: The first direct acceleration of stochastic gradient methods. In *Proceedings of the 49th Annual ACM SIGACT Symposium on Theory of Computing*, pp. 1200–1205, 2017.
- Rajendra Bhatia. *Positive definite matrices*. Princeton university press, 2009.
- Charles G Broyden. A class of methods for solving nonlinear simultaneous equations. *Mathematics of computation*, 19(92):577–593, 1965.
- Sébastien Bubeck et al. Convex optimization: Algorithms and complexity. *Foundations and Trends® in Machine Learning*, 8(3-4):231–357, 2015.
- Jian-Feng Cai, Emmanuel J Candès, and Zuowei Shen. A singular value thresholding algorithm for matrix completion. *SIAM Journal on optimization*, 20(4):1956–1982, 2010.
- Yair Carmon, John C Duchi, Oliver Hinder, and Aaron Sidford. Lower bounds for finding stationary points i. *Mathematical Programming*, 184(1-2):71–120, 2020.
- Chih-Chung Chang and Chih-Jen Lin. Libsvm: a library for support vector machines. *ACM transactions on intelligent systems and technology (TIST)*, 2(3):1–27, 2011.
- Sélim Chraïbi, Ahmed Khaled, Dmitry Kovalev, Peter Richtárik, Adil Salim, and Martin Takáč. Distributed fixed point methods with compressed iterates. *arXiv preprint arXiv:1912.09925*, 2019.
- Rixon Crane and Fred Roosta. Dingo: Distributed newton-type method for gradient-norm optimization. *Advances in Neural Information Processing Systems*, 32, 2019.
- Marina Danilova, Pavel Dvurechensky, Alexander Gasnikov, Eduard Gorbunov, Sergey Guminov, Dmitry Kamzolov, and Innokentiy Shibaev. Recent theoretical advances in non-convex optimization. In *High-Dimensional Optimization and Probability: With a View Towards Data Science*, pp. 79–163. Springer, 2022.
- Aaron Defazio, Francis Bach, and Simon Lacoste-Julien. Saga: A fast incremental gradient method with support for non-strongly convex composite objectives. *Advances in neural information processing systems*, 27, 2014.
- John E Dennis, Jr and Jorge J Moré. Quasi-Newton methods, motivation and theory. *SIAM review*, 19(1):46–89, 1977.
- Steven Diamond and Stephen Boyd. CVXPY: A Python-embedded modeling language for convex optimization. *The Journal of Machine Learning Research*, 17(1):2909–2913, 2016.
- Canh T Dinh, Nguyen H Tran, Tuan Dung Nguyen, Wei Bao, Albert Y Zomaya, and Bing B Zhou. Federated learning with proximal stochastic variance reduced gradient algorithms. In *Proceedings of the 49th International Conference on Parallel Processing*, pp. 1–11, 2020.
- Darina Dvinskikh, Aleksandr Ogaltsov, Alexander Gasnikov, Pavel Dvurechensky, Alexander Tyurin, and Vladimir Spokoiny. Adaptive gradient descent for convex and non-convex stochastic optimization. *arXiv preprint arXiv:1911.08380*, 2019.
- Eduard Gorbunov, Konstantin P Burlachenko, Zhize Li, and Peter Richtárik. Marina: Faster non-convex distributed learning with compression. In *International Conference on Machine Learning*, pp. 3788–3798. PMLR, 2021.

- Robert M Gower, Mark Schmidt, Francis Bach, and Peter Richtárik. Variance-reduced methods for machine learning. *Proceedings of the IEEE*, 108(11):1968–1983, 2020.
- Robert Mansel Gower, Nicolas Loizou, Xun Qian, Alibek Sailanbayev, Egor Shulgin, and Peter Richtárik. Sgd: General analysis and improved rates. In *International Conference on Machine Learning*, pp. 5200–5209. PMLR, 2019.
- William B Gragg and Richard A Tapia. Optimal error bounds for the Newton–Kantorovich theorem. *SIAM Journal on Numerical Analysis*, 11(1):10–13, 1974.
- Kaja Gruntkowska, Alexander Tyurin, and Peter Richtárik. EF21-P and Friends: Improved Theoretical Communication Complexity for Distributed Optimization with Bidirectional Compression, 2022. URL <https://arxiv.org/abs/2209.15218>.
- SV Guminov, Yu E Nesterov, PE Dvurechensky, and AV Gasnikov. Accelerated primal-dual gradient descent with linesearch for convex, nonconvex, and nonsmooth optimization problems. In *Doklady Mathematics*, volume 99, pp. 125–128. Springer, 2019.
- Filip Hanzely and Peter Richtárik. Federated learning of a mixture of global and local models. *arXiv preprint arXiv:2002.05516*, 2020.
- Samuel Horváth, Chen-Yu Ho, Ludovit Horvath, Atal Narayan Sahu, Marco Canini, and Peter Richtárik. Natural compression for distributed deep learning. In *Mathematical and Scientific Machine Learning*, pp. 129–141. PMLR, 2022.
- Samuel Horváth, Dmitry Kovalev, Konstantin Mishchenko, Peter Richtárik, and Sebastian Stich. Stochastic distributed learning with gradient quantization and double-variance reduction. *Optimization Methods and Software*, 38(1):91–106, 2023.
- Rustem Islamov, Xun Qian, and Peter Richtárik. Distributed second order methods with fast rates and compressed communication. In *International conference on machine learning*, pp. 4617–4628. PMLR, 2021.
- Sashank J Reddi, Suvrit Sra, Barnabas Poczos, and Alexander J Smola. Proximal stochastic methods for nonsmooth nonconvex finite-sum optimization. *Advances in neural information processing systems*, 29, 2016.
- Prateek Jain, Purushottam Kar, et al. Non-convex optimization for machine learning. *Foundations and Trends® in Machine Learning*, 10(3-4):142–363, 2017.
- Rie Johnson and Tong Zhang. Accelerating stochastic gradient descent using predictive variance reduction. *Advances in neural information processing systems*, 26, 2013.
- Peter Kairouz, H Brendan McMahan, Brendan Avent, Aurélien Bellet, Mehdi Bennis, Arjun Nitin Bhagoji, Kallista Bonawitz, Zachary Charles, Graham Cormode, Rachel Cummings, et al. Advances and open problems in federated learning. *Foundations and Trends® in Machine Learning*, 14(1-2):1–210, 2021.
- Ahmed Khaled and Peter Richtárik. Better theory for sgd in the nonconvex world. *arXiv preprint arXiv:2002.03329*, 2020.
- Sarit Khirirat, Hamid Reza Feyzmahdavian, and Mikael Johansson. Distributed learning with compressed gradients. *arXiv preprint arXiv:1806.06573*, 2018.
- Jakub Konečný, H Brendan McMahan, Felix X Yu, Peter Richtárik, Ananda Theertha Suresh, and Dave Bacon. Federated learning: Strategies for improving communication efficiency. *arXiv preprint arXiv:1610.05492*, 2016.
- Dmitry Kovalev, Samuel Horváth, and Peter Richtárik. Dont jump through hoops and remove those loops: Svrg and katyusha are better without the outer loop. In *Algorithmic Learning Theory*, pp. 451–467. PMLR, 2020.
- Hanmin Li, Avetik Karagulyan, and Peter Richtárik. Det-cgd: Compressed gradient descent with matrix stepsizes for non-convex optimization. *arXiv preprint arXiv:2305.12568*, 2023.
- Zhize Li, Dmitry Kovalev, Xun Qian, and Peter Richtárik. Acceleration for compressed gradient descent in distributed and federated optimization. *arXiv preprint arXiv:2002.11364*, 2020.

- Zhize Li, Hongyan Bao, Xiangliang Zhang, and Peter Richtárik. PAGE: A simple and optimal probabilistic gradient estimator for nonconvex optimization. In *International conference on machine learning*, pp. 6286–6295. PMLR, 2021.
- Nicolas Loizou, Sharan Vaswani, Issam Hadj Laradji, and Simon Lacoste-Julien. Stochastic polyak step-size for sgd: An adaptive learning rate for fast convergence. In *International Conference on Artificial Intelligence and Statistics*, pp. 1306–1314. PMLR, 2021.
- Julien Mairal. Incremental majorization-minimization optimization with application to large-scale machine learning. *SIAM Journal on Optimization*, 25(2):829–855, 2015.
- Artavazd Maranjyan, Mher Safaryan, and Peter Richtárik. GradSkip: Communication-Accelerated Local Gradient Methods with Better Computational Complexity. *arXiv preprint arXiv:2210.16402*, 2022.
- H. Brendan McMahan, Eider Moore, Daniel Ramage, Seth Hampson, and Blaise Aguera y Arcas. Communication-efficient learning of deep networks from decentralized data. In *Proceedings of the 20th International Conference on Artificial Intelligence and Statistics (AISTATS)*, 2017. URL <http://arxiv.org/abs/1602.05629>.
- George J Miel. Majorizing sequences and error bounds for iterative methods. *Mathematics of Computation*, 34(149): 185–202, 1980.
- Konstantin Mishchenko, Eduard Gorbunov, Martin Takáč, and Peter Richtárik. Distributed learning with compressed gradient differences. *arXiv preprint arXiv:1901.09269*, 2019.
- Konstantin Mishchenko, Grigory Malinovsky, Sebastian Stich, and Peter Richtarik. ProxSkip: Yes! Local gradient steps provably lead to communication acceleration! Finally! In Kamalika Chaudhuri, Stefanie Jegelka, Le Song, Csaba Szepesvari, Gang Niu, and Sivan Sabato (eds.), *Proceedings of the 39th International Conference on Machine Learning*, volume 162 of *Proceedings of Machine Learning Research*, pp. 15750–15769. PMLR, 17–23 Jul 2022. URL <https://proceedings.mlr.press/v162/mishchenko22b.html>.
- Arkadi Nemirovski, Anatoli Juditsky, Guanghui Lan, and Alexander Shapiro. Robust stochastic approximation approach to stochastic programming. *SIAM Journal on optimization*, 19(4):1574–1609, 2009.
- Arkadi Semenovič Nemirovski and David Borisovich Yudin. Problem complexity and method efficiency in optimization. *Wiley-Interscience, ISSN 0277-2698*, 1983.
- Yu Nesterov. Efficiency of coordinate descent methods on huge-scale optimization problems. *SIAM Journal on Optimization*, 22(2):341–362, 2012.
- Yurii Nesterov. *Introductory lectures on convex optimization: A basic course*, volume 87. Springer Science & Business Media, 2003.
- Antonio Orvieto, Simon Lacoste-Julien, and Nicolas Loizou. Dynamics of sgd with stochastic polyak stepsizes: Truly adaptive variants and convergence to exact solution. *Advances in Neural Information Processing Systems*, 35: 26943–26954, 2022.
- Jie Peng, Zhaoxian Wu, Qing Ling, and Tianyi Chen. Byzantine-robust variance-reduced federated learning over distributed non-iid data. *Information Sciences*, 616:367–391, 2022.
- Constantin Philippenko and Aymeric Dieuleveut. Bidirectional compression in heterogeneous settings for distributed or federated learning with partial participation: tight convergence guarantees. *arXiv preprint arXiv:2006.14591*, 2020.
- Xun Qian, Zheng Qu, and Peter Richtárik. L-svrg and l-katyusha with arbitrary sampling. *The Journal of Machine Learning Research*, 22(1):4991–5039, 2021.
- Peter Richtárik and Martin Takáč. Iteration complexity of randomized block-coordinate descent methods for minimizing a composite function. *Mathematical Programming*, 144(1-2):1–38, 2014.
- Mher Safaryan, Filip Hanzely, and Peter Richtárik. Smoothness matrices beat smoothness constants: Better communication compression techniques for distributed optimization. *Advances in Neural Information Processing Systems*, 34:25688–25702, 2021.

- Mher Safaryan, Rustem Islamov, Xun Qian, and Peter Richtarik. Fednl: Making newton-type methods applicable to federated learning. In *International Conference on Machine Learning*, pp. 18959–19010. PMLR, 2022a.
- Mher Safaryan, Egor Shulgin, and Peter Richtárik. Uncertainty principle for communication compression in distributed and federated learning and the search for an optimal compressor. *Information and Inference: A Journal of the IMA*, 11(2):557–580, 2022b.
- Fabian Schaipp, Robert M Gower, and Michael Ulbrich. A stochastic proximal polyak step size. *arXiv preprint arXiv:2301.04935*, 2023.
- Mark Schmidt, Nicolas Le Roux, and Francis Bach. Minimizing finite sums with the stochastic average gradient. *Mathematical Programming*, 162:83–112, 2017.
- Egor Shulgin and Peter Richtárik. Shifted compression framework: Generalizations and improvements. In *Uncertainty in Artificial Intelligence*, pp. 1813–1823. PMLR, 2022.
- Robert Tibshirani. Regression shrinkage and selection via the lasso. *Journal of the Royal Statistical Society Series B: Statistical Methodology*, 58(1):267–288, 1996.
- Alexander Tyurin and Peter Richtárik. DASHA: Distributed nonconvex optimization with communication compression, optimal oracle complexity, and no client synchronization. *arXiv preprint arXiv:2202.01268*, 2022.
- Bokun Wang, Mher Safaryan, and Peter Richtárik. Theoretically better and numerically faster distributed optimization with smoothness-aware quantization techniques. *Advances in Neural Information Processing Systems*, 35:9841–9852, 2022.
- Shusen Wang, Fred Roosta, Peng Xu, and Michael W Mahoney. Giant: Globally improved approximate newton method for distributed optimization. *Advances in Neural Information Processing Systems*, 31, 2018.
- Stephen J Wright. Coordinate descent algorithms. *Mathematical programming*, 151(1):3–34, 2015.
- Tetsuro Yamamoto. A convergence theorem for newton-like methods in banach spaces. *Numerische Mathematik*, 51: 545–557, 1987.
- Jiaqi Zhang, Keyou You, and Tamer Başar. Achieving globally superlinear convergence for distributed optimization with adaptive newton method. In *2020 59th IEEE Conference on Decision and Control (CDC)*, pp. 2329–2334. IEEE, 2020a.
- Jingzhao Zhang, Sai Praneeth Karimireddy, Andreas Veit, Seungyeon Kim, Sashank Reddi, Sanjiv Kumar, and Suvrit Sra. Why are adaptive methods good for attention models? *Advances in Neural Information Processing Systems*, 33:15383–15393, 2020b.

# CONTENTS

|                                                                   |           |
|-------------------------------------------------------------------|-----------|
| <b>A Basic Facts</b>                                              | <b>15</b> |
| <b>B Properties of matrix smoothness</b>                          | <b>17</b> |
| B.1 The matrix Lipschitz-continuous gradient                      | 17        |
| B.1.1 Quadratics                                                  | 17        |
| B.2 Comparison of the different smoothness conditions             | 18        |
| B.3 Proofs of the propositions regarding smoothness               | 18        |
| B.3.1 Proof of Proposition 1                                      | 18        |
| B.3.2 Proof of Proposition 2                                      | 19        |
| B.3.3 Proof of Proposition 3                                      | 19        |
| B.3.4 Proof of Proposition 4                                      | 20        |
| B.3.5 Proof of Proposition 5                                      | 21        |
| B.3.6 Proof of Proposition 6                                      | 21        |
| B.3.7 Proof of Proposition 7                                      | 22        |
| <b>C Analysis of <math>\det</math>-MARINA</b>                     | <b>23</b> |
| C.1 Proof of Theorem 1                                            | 23        |
| C.2 Comparison of different stepsizes                             | 26        |
| C.2.1 The diagonal case                                           | 26        |
| C.2.2 The identity case                                           | 26        |
| C.3 Proofs of the corollaries                                     | 27        |
| C.3.1 Proof of Corollary 1                                        | 27        |
| C.3.2 Proof of Corollary 2                                        | 27        |
| C.3.3 Proof of Corollary 3                                        | 28        |
| C.3.4 Proof of Corollary 4                                        | 29        |
| C.3.5 Proof of Corollary 5                                        | 29        |
| <b>D Distributed <math>\det</math>-CGD</b>                        | <b>30</b> |
| <b>E Extension of <math>\det</math>-CGD2 in MARINA form</b>       | <b>31</b> |
| E.1 Extension of $\det$ -CGD2 to its variance reduced counterpart | 31        |
| E.2 Analysis of Algorithm 3                                       | 32        |
| E.3 Proof of Theorem 3                                            | 32        |
| <b>F Proofs of the technical lemmas</b>                           | <b>35</b> |
| F.1 Proof of Lemma 1                                              | 35        |
| F.2 Proof of Lemma 2                                              | 36        |



|          |                                                        |           |
|----------|--------------------------------------------------------|-----------|
| F.3      | Proof of Lemma 3 . . . . .                             | 36        |
| F.4      | Proof of Lemma 4 . . . . .                             | 37        |
| <b>G</b> | <b>Experiments</b>                                     | <b>37</b> |
| G.1      | The setting . . . . .                                  | 38        |
| G.2      | Improvements on MARINA . . . . .                       | 38        |
| G.3      | Improvements on non variance reduced methods . . . . . | 40        |
| G.4      | Improvements on det-CGD . . . . .                      | 40        |
| G.5      | Comparing different stepsize choices . . . . .         | 43        |
| G.6      | Comparing communication complexity . . . . .           | 44        |

## A BASIC FACTS

In this section, we present some basic facts along with their proofs that will be used later in the analysis.

**Fact 1.** For two matrices  $\mathbf{A}, \mathbf{B} \in \mathbb{S}_+^d$ , denote the  $i$ -th largest eigenvalues of  $\mathbf{A}, \mathbf{B}$  as  $\lambda_i(\mathbf{A}), \lambda_i(\mathbf{B})$ , if  $\mathbf{A} \succeq \mathbf{B}$ , then the following holds

$$\lambda_i(\mathbf{A}) \geq \lambda_i(\mathbf{B}). \quad (20)$$

*Proof.* According to the Courant-Fischer theorem, we write

$$\lambda_i(\mathbf{B}) = \max_{S: \dim S=i} \min_{x \in S \setminus \{0\}} \frac{x^\top \mathbf{B} x}{x^\top x}.$$

Let  $S_{\max}^i$  be a subspace of dimension  $i$  where the maximum is attained, we then have

$$\begin{aligned} \lambda_i(\mathbf{B}) &= \min_{x \in S_{\max}^i \setminus \{0\}} \frac{x^\top \mathbf{B} x}{x^\top x} \\ &\leq \min_{x \in S_{\max}^i \setminus \{0\}} \frac{x^\top \mathbf{A} x}{x^\top x} \\ &\leq \max_{S: \dim S=i} \min_{x \in S \setminus \{0\}} \frac{x^\top \mathbf{A} x}{x^\top x} = \lambda_i(\mathbf{A}). \end{aligned}$$

This completes the proof. □

The following is a generalization of the bias-variance decomposition for the matrix norm.

**Fact 2. (Variance Decomposition)** Given a matrix  $\mathbf{M} \in \mathbb{S}_{++}^d$ , any vector  $c \in \mathbb{R}^d$ , and a random vector  $x \in \mathbb{R}^d$  such that  $\mathbb{E}[\|x\|] \leq +\infty$ , the following bound holds

$$\mathbb{E} \left[ \|x - \mathbb{E}[x]\|_{\mathbf{M}}^2 \right] = \mathbb{E} \left[ \|x - c\|_{\mathbf{M}}^2 \right] - \|\mathbb{E}[x] - c\|_{\mathbf{M}}^2. \quad (21)$$

*Proof.* We have

$$\begin{aligned} &\mathbb{E} \left[ \|x - c\|_{\mathbf{M}}^2 \right] - \|\mathbb{E}[x] - c\|_{\mathbf{M}}^2 \\ &= \mathbb{E} \left[ x^\top \mathbf{M} x \right] - 2\mathbb{E}[x]^\top \mathbf{M} c + c^\top \mathbf{M} c - \mathbb{E}[x]^\top \mathbf{M} \mathbb{E}[x] + 2\mathbb{E}[x]^\top \mathbf{M} c - c^\top \mathbf{M} c \\ &= \mathbb{E} \left[ x^\top \mathbf{M} x \right] - \mathbb{E}[x]^\top \mathbf{M} \mathbb{E}[x] \\ &= \mathbb{E} \left[ x^\top \mathbf{M} x \right] - 2 \cdot \mathbb{E}[x]^\top \mathbf{M} \mathbb{E}[x] + \mathbb{E}[x]^\top \mathbf{M} \mathbb{E}[x] \\ &= \mathbb{E} \left[ \|x - \mathbb{E}[x]\|_{\mathbf{M}}^2 \right]. \end{aligned}$$

This completes the proof. □

**Fact 3.** The map  $(A, B, X) \mapsto A - XB^{-1}X$  is jointly concave on  $\mathbb{S}_+^d \times \mathbb{S}_{++}^d \times \mathbb{S}^d$ . It is also monotone increasing in variables  $A$  and  $B$ .

We refer the reader to (Bhatia, 2009, Corollary 1.5.3) for the details and the proof. The following is a result of Fact 1 and Fact 3.

**Fact 4.** Suppose  $L_i \in \mathbb{S}_{++}^d$ , for  $i = 1, \dots, n$ . Then, for every matrix  $X \in \mathbb{S}_{++}^d$ , we define the following mapping

$$f(X, L_1, \dots, L_n) = \frac{1}{n} \sum_{i=1}^n \lambda_{\max}(L_i) \cdot \lambda_{\max}(L_i X^{-1}) \cdot \lambda_{\max}(X^{-1}).$$

Then the above mapping is monotone decreasing in  $X$ .

*Proof.* First we notice that from Fact 3 the mapping  $X \mapsto X^{-1}$  is monotone decreasing. The latter means that if we have any  $X_1, X_2 \in \mathbb{S}_{++}^d$  such that  $X_1 \succeq X_2$ , we have

$$X_1^{-1} \preceq X_2^{-1}.$$

Then it immediately follows, due to Fact 1, that

$$0 < \lambda_{\max}(X_1^{-1}) \leq \lambda_{\max}(X_2^{-1}).$$

We also notice that the relation  $\lambda_{\max}(L_i X^{-1}) = \lambda_{\max}(L_i^{\frac{1}{2}} X^{-1} L_i^{\frac{1}{2}}) = \lambda_{\max}(X^{-1} L_i)$ , and that the mapping  $X \mapsto L_i^{\frac{1}{2}} X^{-1} L_i^{\frac{1}{2}}$  is also monotone decreasing for every  $i \in [n]$ , so we have

$$0 < \lambda_{\max}(L_i X_1^{-1}) \leq \lambda_{\max}(L_i X_2^{-1}).$$

Since we have the coefficient  $\lambda_{\max}(L_i) > 0$ , it follows that,

$$f(X_1, L_1, \dots, L_n) \leq f(X_2, L_1, \dots, L_n).$$

This means that  $f(X)$  is monotone decreasing in  $X$ . □

**Fact 5.** For any two matrices  $A, B \in \mathbb{S}_{++}^d$ , the following relation regarding their largest eigenvalue holds

$$\lambda_{\max}(AB) \leq \lambda_{\max}(A) \cdot \lambda_{\max}(B). \quad (22)$$

*Proof.* Using the Courant-Fischer theorem, we can write

$$\begin{aligned} \lambda_{\max}(AB) &= \min_{S: \dim S=d} \max_{x \in S \setminus \{0\}} \frac{x^\top ABx}{x^\top x} \\ &= \max_{x \in \mathbb{R}^d \setminus \{0\}} \frac{x^\top ABx}{x^\top x} \\ &\leq \max_{x \in \mathbb{R}^d \setminus \{0\}} \frac{x^\top Ax}{x^\top x} \cdot \max_{x \in \mathbb{R}^d \setminus \{0\}} \frac{x^\top Bx}{x^\top x} \\ &= \lambda_{\max}(A) \cdot \lambda_{\max}(B). \end{aligned}$$

□

**Fact 6.** Given matrix  $Q \in \mathbb{S}_{++}^d$  and its matrix norm  $\|\cdot\|_Q$ , its associated dual norm is  $\|\cdot\|_{Q^{-1}}$ .

*Proof.* Let  $\|\cdot\|_*$  denote the dual norm, then for any vector  $z \in \mathbb{R}^d$ , we have

$$\|z\|_* = \sup\{z^\top x : \|x\|_Q \leq 1\}.$$

This is the same as solving  $\sup\{z^\top x : \|x\|_Q^2 = 1\}$ . The Lagrange function is given as

$$f(x, \lambda) = z^\top x - \lambda (\|x\|_Q^2 - 1) = z^\top x - \lambda (x^\top Qx - 1).$$

Computing the derivatives we deduce that

$$\frac{\partial f(x, \lambda)}{\partial x} = z - 2\lambda \cdot \mathbf{Q}x = 0, \quad \frac{\partial f(x, \lambda)}{\partial \lambda} = \|x\|_{\mathbf{Q}}^2 - 1 = 0.$$

This leads to

$$\lambda = \frac{\|z\|_{\mathbf{Q}^{-1}}}{2}, \quad x = \frac{\mathbf{Q}^{-1}z}{\|z\|_{\mathbf{Q}^{-1}}}.$$

As a result, we have

$$\begin{aligned} \sup\{z^\top x : \|x\|_{\mathbf{Q}} \leq 1\} &= \sup\{z^\top x : \|x\|_{\mathbf{Q}}^2 = 1\} \\ &= z^\top z = \frac{z^\top \mathbf{Q}^{-1}z}{\|z\|_{\mathbf{Q}^{-1}}} \\ &= \|z\|_{\mathbf{Q}^{-1}}. \end{aligned}$$

This completes the proof.  $\square$

## B PROPERTIES OF MATRIX SMOOTHNESS

### B.1 THE MATRIX LIPSCHITZ-CONTINUOUS GRADIENT

In this section we describe some properties of matrix smoothness, matrix gradient Lipschitzness and their relations.

#### B.1.1 QUADRATICS

Given a matrix  $\mathbf{A} \in \mathbb{S}_{++}^d$  and a vector  $b \in \mathbb{R}^d$ , consider the function  $f(x) = \frac{1}{2}x^\top \mathbf{A}x + b^\top x + c$ . Then its gradient is computed as  $\nabla f(x) = \mathbf{A}x + b$  and  $\nabla^2 f(x) = \mathbf{A}$ . Inserting gradients formula into (5) we deduce

$$\sqrt{(x-y)^\top \mathbf{A} \mathbf{L}^{-1} \mathbf{A} (x-y)} \leq \sqrt{(x-y)^\top \mathbf{L} (x-y)},$$

for any  $x, y \in \mathbb{R}^d$ . This reduces to

$$\mathbf{A} \mathbf{L}^{-1} \mathbf{A} \preceq \mathbf{L}. \quad (23)$$

Since  $\mathbf{A} \in \mathbb{S}_{++}^d$ , we can also rewrite (23) as

$$\mathbf{A}^{\frac{1}{2}} \mathbf{L}^{-1} \mathbf{A}^{\frac{1}{2}} \preceq \mathbf{A}^{-\frac{1}{2}} \mathbf{L} \mathbf{A}^{-\frac{1}{2}},$$

which is equivalent to

$$\mathbf{A} \preceq \mathbf{L}. \quad (24)$$

Therefore, the ‘‘best’’  $\mathbf{L} \in \mathbb{S}_{++}^d$  that satisfies (5) is  $\mathbf{L} = \mathbf{A} = \nabla^2 f(x)$ , for every  $x \in \mathbb{R}^d$ . Now, let us look at a more general setting. Consider  $f$  given as follows,

$$f(x) = \sum_{i=1}^s \phi_i(\mathbf{M}_i x),$$

where  $\mathbf{M}_i \in \mathbb{R}^{q_i \times d}$ . Here  $f : \mathbb{R}^d \mapsto \mathbb{R}$  is the sum of functions  $\phi_i : \mathbb{R}^{q_i} \mapsto \mathbb{R}$ . We assume that each function  $\phi_i$  has matrix  $\mathbf{L}_i$  Lipschitz gradient. We have the following lemma regarding the matrix gradient Lipschitzness of  $f$ .

**Proposition 3.** *Assume that functions  $f$  and  $\{\phi_i\}_{i=1}^s$  are described above. Then function  $f$  has  $\mathbf{L}$ -Lipschitz gradient, if the following condition is satisfied:*

$$\sum_{i=1}^s \lambda_{\max} \left( \mathbf{L}_i^{\frac{1}{2}} \mathbf{M}_i \mathbf{L}^{-1} \mathbf{M}_i^\top \mathbf{L}_i^{\frac{1}{2}} \right) = 1. \quad (25)$$

Note that Proposition 3 is a generalization of the previous case of quadratics, if we pick  $s = 1$ ,  $\mathbf{M}_i = \mathbf{A}^{\frac{1}{2}}$  and  $\phi_1(x) = x^\top \mathbf{I}_d x$ , the condition becomes  $\mathbf{L} = \mathbf{A}$ , which is exactly the solution given by (24). Thus we recover the result for quadratics. The linear term  $bx + c$  is ignored in this case. In Proposition 3, we only intend to give a way of finding a matrix  $\mathbf{L} \in \mathbb{S}_{++}^d$ , so that  $f$  has  $\mathbf{L}$ -Lipschitz gradient. This does not mean, however, the  $\mathbf{L}$  here is optimal. The proof is deferred to Appendix B.3.

## B.2 COMPARISON OF THE DIFFERENT SMOOTHNESS CONDITIONS

We provide a proposition here which describes an equivalent form of stating  $\mathbf{L}$ -matrix smoothness of a function  $f$ . This proposition is used to illustrate the relation between matrix smoothness and matrix Lipschitz gradient.

**Proposition 4.** *Let function  $f : \mathbb{R}^d \rightarrow \mathbb{R}$  be continuously differentiable. Then the following statements are equivalent.*

- (i)  $f$  is  $\mathbf{L}$ -matrix smooth.
- (ii)  $\langle \nabla f(x) - \nabla f(y), x - y \rangle \leq \|x - y\|_{\mathbf{L}}^2$  for all  $x, y \in \mathbb{R}^d$ .

The two propositions, Proposition 5 and Proposition 6, formulated below illustrate the relation between matrix smoothness of  $f$  and matrix gradient Lipschitzness of  $f$ .

**Proposition 5.** *Assume  $f : \mathbb{R}^d \mapsto \mathbb{R}$  is a continuously differentiable function, and its gradient is  $\mathbf{L}$ -Lipschitz continuous with  $\mathbf{L} \in \mathbb{S}_{++}^d$ . Then function  $f$  is  $\mathbf{L}$ -matrix smooth.*

**Proposition 6.** *Assume  $f : \mathbb{R}^d \rightarrow \mathbb{R}$  is a continuously differentiable function. Assume also that  $f$  is convex and  $\mathbf{L}$ -matrix smooth. Then  $\nabla f$  is  $\mathbf{L}$ -Lipschitz continuous.*

The next proposition shows that standard Lipschitzness of the gradient of a function is an immediate consequence of matrix Lipschitzness.

**Proposition 7.** *Assume that the gradient of  $f$  is  $\mathbf{L}$ -Lipschitz continuous. Then  $\nabla f$  is also  $L$ -Lipschitz with  $L = \lambda_{\max}(\mathbf{L})$ .*

## B.3 PROOFS OF THE PROPOSITIONS REGARDING SMOOTHNESS

### B.3.1 PROOF OF PROPOSITION 1

We start with picking any two vector  $x, y \in \mathbb{R}^d$ . We have

$$\begin{aligned} & \|\nabla f(x) - \nabla f(y)\|_{\mathbf{L}^{-1}}^2 \\ &= \left\| \int_0^1 \nabla^2 f(\theta x + (1 - \theta)y)(x - y) d\theta \right\|_{\mathbf{L}^{-1}}^2 \\ &= (x - y)^\top \left( \int_0^1 \nabla^2 f(\theta x + (1 - \theta)y) d\theta \right)^\top \mathbf{L}^{-1} \left( \int_0^1 \nabla^2 f(\theta x + (1 - \theta)y) d\theta \right) (x - y). \end{aligned}$$

Denote  $\mathbf{F} := \int_0^1 \nabla^2 f(\theta x + (1 - \theta)y) d\theta$ , notice that  $\mathbf{F}$  is a symmetric matrix. Then, the previous identity becomes

$$\|\nabla f(x) - \nabla f(y)\|_{\mathbf{L}^{-1}}^2 = (x - y)^\top \mathbf{F}^\top \mathbf{L}^{-1} \mathbf{F} (x - y).$$

From the definition of  $\mathbf{F}$  and the bounded Hessian assumption, we have  $\mathbf{F} \preceq \mathbf{L}$ . Let us prove that  $\mathbf{F}\mathbf{L}^{-1}\mathbf{F} \preceq \mathbf{L}$ :

$$\begin{aligned} \mathbf{F}\mathbf{L}^{-1}\mathbf{F} \preceq \mathbf{L} &\iff \mathbf{L}^{-\frac{1}{2}}\mathbf{F}\mathbf{L}\mathbf{F}\mathbf{L}^{-\frac{1}{2}} \preceq \mathbf{I}_d \\ &\iff \mathbf{L}^{-\frac{1}{2}}\mathbf{F}\mathbf{L}^{-\frac{1}{2}} \cdot \mathbf{L}^{-\frac{1}{2}}\mathbf{F}\mathbf{L}^{-\frac{1}{2}} \preceq \mathbf{I}_d \\ &\iff \mathbf{L}^{-\frac{1}{2}}\mathbf{F}\mathbf{L}^{-\frac{1}{2}} \preceq \mathbf{I}_d \\ &\iff \mathbf{F} \preceq \mathbf{L}. \end{aligned}$$

This means that

$$\begin{aligned} \|\nabla f(x) - \nabla f(y)\|_{\mathbf{L}^{-1}}^2 &\leq (x - y)^\top \mathbf{L} (x - y) \\ &= \|x - y\|_{\mathbf{L}}^2, \end{aligned}$$

which completes the proof.

### B.3.2 PROOF OF PROPOSITION 2

We start with the definition of  $\mathbf{L}$ -Lipschitz gradient of function  $f$ , and pick two arbitrary points  $x, y \in \mathbb{R}^d$ ,

$$\|\nabla f(x) - \nabla f(y)\|_{\mathbf{L}^{-1}}^2 = \left\| \frac{1}{n} \sum_{i=1}^n (\nabla f_i(x) - \nabla f_i(y)) \right\|_{\mathbf{L}^{-1}}^2.$$

Applying the convexity of  $\|\cdot\|_{\mathbf{L}^{-1}}^2$ , we have

$$\|\nabla f(x) - \nabla f(y)\|_{\mathbf{L}^{-1}}^2 \leq \frac{1}{n} \sum_{i=1}^n \|\nabla f_i(x) - \nabla f_i(y)\|_{\mathbf{L}^{-1}}^2.$$

For each term within the summation, we use the definition of matrix norms and replace the matrix  $\mathbf{L}^{-1}$  with  $\mathbf{L}_i^{-1/2} \mathbf{L}_i^{1/2} \mathbf{L}^{-1} \mathbf{L}_i^{1/2} \mathbf{L}_i^{-1/2}$ , for every  $i = 1, \dots, n$ :

$$\begin{aligned} \|\nabla f(x) - \nabla f(y)\|_{\mathbf{L}^{-1}}^2 &= \frac{1}{n} \sum_{i=1}^n \left( \mathbf{L}_i^{-\frac{1}{2}} (\nabla f_i(x) - \nabla f_i(y)) \right)^\top \mathbf{L}_i^{\frac{1}{2}} \mathbf{L}^{-1} \mathbf{L}_i^{\frac{1}{2}} \left( \mathbf{L}_i^{-\frac{1}{2}} (\nabla f_i(x) - \nabla f_i(y)) \right) \\ &\leq \frac{1}{n} \sum_{i=1}^n \lambda_{\max} \left( \mathbf{L}_i^{\frac{1}{2}} \mathbf{L}^{-1} \mathbf{L}_i^{\frac{1}{2}} \right) \left\| \mathbf{L}_i^{-\frac{1}{2}} (\nabla f_i(x) - \nabla f_i(y)) \right\|^2 \\ &= \frac{1}{n} \sum_{i=1}^n \lambda_{\max} \left( \mathbf{L}_i^{\frac{1}{2}} \mathbf{L}^{-1} \mathbf{L}_i^{\frac{1}{2}} \right) \|\nabla f_i(x) - \nabla f_i(y)\|_{\mathbf{L}_i^{-1}}^2. \end{aligned}$$

Using the assumption that the gradient of each function  $f_i$  is  $\mathbf{L}_i$ -Lipschitz, we obtain,

$$\|\nabla f(x) - \nabla f(y)\|_{\mathbf{L}^{-1}}^2 \leq \frac{1}{n} \sum_{i=1}^n \lambda_{\max} \left( \mathbf{L}_i^{\frac{1}{2}} \mathbf{L}^{-1} \mathbf{L}_i^{\frac{1}{2}} \right) \|x - y\|_{\mathbf{L}_i}^2.$$

We apply the same replacement trick again, this time replacing  $\mathbf{L}_i^{-1}$  with  $\mathbf{L}^{-1/2} \mathbf{L}_i^{1/2} \mathbf{L}_i^{-1} \mathbf{L}_i^{1/2} \mathbf{L}^{-1/2}$

$$\begin{aligned} \|\nabla f(x) - \nabla f(y)\|_{\mathbf{L}^{-1}}^2 &= \frac{1}{n} \sum_{i=1}^n \lambda_{\max} \left( \mathbf{L}_i^{\frac{1}{2}} \mathbf{L}^{-1} \mathbf{L}_i^{\frac{1}{2}} \right) \cdot \left[ (\mathbf{L}^{\frac{1}{2}} (x - y))^\top \mathbf{L}^{-\frac{1}{2}} \mathbf{L}_i \mathbf{L}^{-\frac{1}{2}} (\mathbf{L}^{\frac{1}{2}} (x - y)) \right] \\ &\leq \frac{1}{n} \sum_{i=1}^n \lambda_{\max} \left( \mathbf{L}_i^{\frac{1}{2}} \mathbf{L}^{-1} \mathbf{L}_i^{\frac{1}{2}} \right) \cdot \lambda_{\max} \left( \mathbf{L}^{-\frac{1}{2}} \mathbf{L}_i \mathbf{L}^{-\frac{1}{2}} \right) \left\| \mathbf{L}^{\frac{1}{2}} (x - y) \right\|^2. \end{aligned}$$

Using Fact 5, we are deduce the following bound,

$$\begin{aligned} \|\nabla f(x) - \nabla f(y)\|_{\mathbf{L}^{-1}}^2 &\leq \left( \frac{1}{n} \sum_{i=1}^n \lambda_{\max}(\mathbf{L}^{-1}) \cdot \lambda_{\max}(\mathbf{L}_i) \cdot \lambda_{\max}(\mathbf{L}_i \mathbf{L}^{-1}) \right) \cdot \|x - y\|_{\mathbf{L}}^2 \\ &= \|x - y\|_{\mathbf{L}}^2. \end{aligned}$$

This completes the proof.

### B.3.3 PROOF OF PROPOSITION 3

For any  $x$  and  $y$  from  $\mathbb{R}^d$ , we have

$$\begin{aligned} &\|\nabla f(x) - \nabla f(y)\|_{\mathbf{L}^{-1}} \\ &= \left\| \sum_{i=1}^s \mathbf{M}_i^\top \nabla \phi_i(\mathbf{M}_i x) - \sum_{i=1}^s \mathbf{M}_i^\top \nabla \phi_i(\mathbf{M}_i y) \right\|_{\mathbf{L}^{-1}} \\ &= s \cdot \left\| \frac{1}{s} \sum_{i=1}^s \mathbf{M}_i^\top (\nabla \phi_i(\mathbf{M}_i x) - \nabla \phi_i(\mathbf{M}_i y)) \right\|_{\mathbf{L}^{-1}}. \end{aligned}$$



Applying the convexity of the norm  $\|\cdot\|_{\mathbf{L}^{-1}}$ ,

$$\|\nabla f(x) - \nabla f(y)\|_{\mathbf{L}^{-1}} \leq s \cdot \frac{1}{s} \sum_{i=1}^s \|\mathbf{M}_i^\top (\nabla \phi_i(\mathbf{M}_i x) - \nabla \phi_i(\mathbf{M}_i y))\|_{\mathbf{L}^{-1}}.$$

Expanding the norm and applying the replacement trick for above  $\mathbf{L}$  and  $\mathbf{M}_i$ , we obtain

$$\begin{aligned} & \|\nabla f(x) - \nabla f(y)\|_{\mathbf{L}^{-1}} \\ &= \sum_{i=1}^s \sqrt{(\nabla \phi_i(\mathbf{M}_i x) - \nabla \phi_i(\mathbf{M}_i y))^\top \mathbf{M}_i \mathbf{L}^{-1} \mathbf{M}_i^\top (\nabla \phi_i(\mathbf{M}_i x) - \nabla \phi_i(\mathbf{M}_i y))} \\ &= \sum_{i=1}^s \sqrt{\left[ \mathbf{L}_i^{-\frac{1}{2}} (\nabla \phi_i(\mathbf{M}_i x) - \nabla \phi_i(\mathbf{M}_i y)) \right]^\top \mathbf{L}_i^{\frac{1}{2}} \mathbf{M}_i \mathbf{L}^{-1} \mathbf{M}_i^\top \mathbf{L}_i^{\frac{1}{2}} \left[ \mathbf{L}_i^{-\frac{1}{2}} (\nabla \phi_i(\mathbf{M}_i x) - \nabla \phi_i(\mathbf{M}_i y)) \right]} \\ &\leq \sum_{i=1}^s \sqrt{\lambda_{\max} \left( \mathbf{L}_i^{\frac{1}{2}} \mathbf{M}_i \mathbf{L}^{-1} \mathbf{M}_i^\top \mathbf{L}_i^{\frac{1}{2}} \right) \cdot \|\nabla \phi_i(\mathbf{M}_i x) - \nabla \phi_i(\mathbf{M}_i y)\|_{\mathbf{L}_i^{-1}}}. \end{aligned}$$

Due to the assumption that the gradient of  $\phi_i$  is  $\mathbf{L}_i$ -Lipschitz, we have

$$\begin{aligned} & \|\nabla f(x) - \nabla f(y)\|_{\mathbf{L}^{-1}} \\ &\leq \sum_{i=1}^s \sqrt{\lambda_{\max} \left( \mathbf{L}_i^{\frac{1}{2}} \mathbf{M}_i \mathbf{L}^{-1} \mathbf{M}_i^\top \mathbf{L}_i^{\frac{1}{2}} \right) \cdot \|\mathbf{M}_i(x - y)\|_{\mathbf{L}_i}} \\ &= \sum_{i=1}^s \sqrt{\lambda_{\max} \left( \mathbf{L}_i^{\frac{1}{2}} \mathbf{M}_i \mathbf{L}^{-1} \mathbf{M}_i^\top \mathbf{L}_i^{\frac{1}{2}} \right) \cdot \sqrt{\left[ \mathbf{L}_i^{\frac{1}{2}}(x - y) \right]^\top \mathbf{L}^{-\frac{1}{2}} \mathbf{M}_i^\top \mathbf{L}_i \mathbf{M}_i \mathbf{L}^{-\frac{1}{2}} \left[ \mathbf{L}_i^{\frac{1}{2}}(x - y) \right]}} \\ &\leq \sum_{i=1}^s \sqrt{\lambda_{\max} \left( \mathbf{L}_i^{\frac{1}{2}} \mathbf{M}_i \mathbf{L}^{-1} \mathbf{M}_i^\top \mathbf{L}_i^{\frac{1}{2}} \right) \cdot \lambda_{\max} \left( \mathbf{L}^{-\frac{1}{2}} \mathbf{M}_i^\top \mathbf{L}_i \mathbf{M}_i \mathbf{L}^{-\frac{1}{2}} \right) \cdot \|x - y\|_{\mathbf{L}}} \\ &\leq \sum_{i=1}^s \lambda_{\max} \left( \mathbf{L}_i^{\frac{1}{2}} \mathbf{M}_i \mathbf{L}^{-1} \mathbf{M}_i^\top \mathbf{L}_i^{\frac{1}{2}} \right) \cdot \|x - y\|_{\mathbf{L}}, \end{aligned}$$

where the last inequality is due to the fact that,

$$\lambda_{\max} \left( \mathbf{L}_i^{\frac{1}{2}} \mathbf{M}_i \mathbf{L}^{-1} \mathbf{M}_i^\top \mathbf{L}_i^{\frac{1}{2}} \right) = \lambda_{\max} \left( \mathbf{L}^{-\frac{1}{2}} \mathbf{M}_i^\top \mathbf{L}_i \mathbf{M}_i \mathbf{L}^{-\frac{1}{2}} \right).$$

Recalling the condition of the proposition:

$$\sum_{i=1}^s \lambda_{\max} \left( \mathbf{L}_i^{\frac{1}{2}} \mathbf{M}_i \mathbf{L}^{-1} \mathbf{M}_i^\top \mathbf{L}_i^{\frac{1}{2}} \right) = 1,$$

we deduce

$$\|\nabla f(x) - \nabla f(y)\|_{\mathbf{L}^{-1}} \leq \|x - y\|_{\mathbf{L}}.$$

This completes the proof.

#### B.3.4 PROOF OF PROPOSITION 4

(i)  $\rightarrow$  (ii). If  $f$  is  $\mathbf{L}$ -matrix smooth, then for all  $x, y \in \mathbb{R}^d$ , we have

$$f(x) \leq f(y) + \langle \nabla f(y), x - y \rangle + \frac{1}{2} \|x - y\|_{\mathbf{L}}^2,$$

and

$$f(y) \leq f(x) + \langle \nabla f(x), y - x \rangle + \frac{1}{2} \|x - y\|_{\mathbf{L}}^2.$$

Summing up these two inequalities we get

$$\langle \nabla f(x) - \nabla f(y), x - y \rangle \leq \|x - y\|_{\mathbf{L}}^2.$$

(ii)  $\rightarrow$  (i). Choose any  $x, y \in \mathbb{R}^d$ , and define  $z = x + t(y - x)$ , then we have,

$$\begin{aligned} f(y) &= f(x) + \int_0^1 \langle \nabla f(x + t(y - x)), y - x \rangle dt \\ &= f(x) + \int_0^1 \langle \nabla f(z), y - x \rangle dt \\ &= f(x) + \langle \nabla f(x), y - x \rangle + \int_0^1 \langle \nabla f(z) - \nabla f(x), y - x \rangle dt \\ &= f(x) + \langle \nabla f(x), y - x \rangle + \int_0^1 \langle \nabla f(z) - \nabla f(x), z - x \rangle \cdot \frac{1}{t} dt. \end{aligned}$$

Using the assumption that for any  $x, z \in \mathbb{R}^d$ , we have

$$\langle \nabla f(z) - \nabla f(x), z - x \rangle \leq \|z - x\|_{\mathbf{L}}^2.$$

Plug this back into the previous identity, we obtain

$$\begin{aligned} f(y) &\leq f(x) + \langle \nabla f(x), y - x \rangle + \int_0^1 \|z - x\|_{\mathbf{L}}^2 \cdot \frac{1}{t} dt \\ &= f(x) + \langle \nabla f(x), y - x \rangle + \int_0^1 \|y - x\|_{\mathbf{L}}^2 \cdot t dt \\ &= f(x) + \langle \nabla f(x), y - x \rangle + \frac{1}{2} \|y - x\|_{\mathbf{L}}^2. \end{aligned}$$

We conclude the proof.

### B.3.5 PROOF OF PROPOSITION 5

We start with picking any two points  $x, y \in \mathbb{R}^d$ , using the generalized Cauchy-Schwarz inequality for dual norm, we have

$$\begin{aligned} \langle \nabla f(x) - \nabla f(y), x - y \rangle &\leq \|\nabla f(x) - \nabla f(y)\|_{\mathbf{L}^{-1}} \cdot \|x - y\|_{\mathbf{L}} \\ &\stackrel{(5)}{\leq} \|x - y\|_{\mathbf{L}} \cdot \|x - y\|_{\mathbf{L}} \\ &= \|x - y\|_{\mathbf{L}}^2 \end{aligned}$$

From Proposition 4, this indicates that function  $f$  is  $\mathbf{L}$ -matrix smooth. This completes the proof.

### B.3.6 PROOF OF PROPOSITION 6

Using Proposition 4, we know that for any  $x, y \in \mathbb{R}^d$ , we have

$$\langle \nabla f(x) - \nabla f(y), x - y \rangle \leq \|x - y\|_{\mathbf{L}}^2. \quad (26)$$

Now we pick any three points  $x, y, z \in \mathbb{R}^d$ . Using the  $\mathbf{L}$ -smoothness of  $f$ , we have

$$f(x + z) \geq f(x) + \langle \nabla f(x), z \rangle + \frac{1}{2} \|z\|_{\mathbf{L}}^2. \quad (27)$$

Using the convexity of  $f$  we have

$$\langle \nabla f(y), x + z - y \rangle \leq f(x + z) - f(y). \quad (28)$$

Combining (27) and (28), we obtain

$$\langle \nabla f(y), x + z - y \rangle \leq f(x) - f(y) + \langle \nabla f(x), z \rangle + \frac{1}{2} \|z\|_{\mathbf{L}}^2.$$

Rearranging terms we get

$$\langle \nabla f(y) - \nabla f(x), z \rangle - \frac{1}{2} \|z\|_{\mathbf{L}}^2 \leq f(x) - f(y) - \langle \nabla f(y), x - y \rangle.$$

The inequality holds for any  $z$  for fixed  $x$  and  $y$ , and the left hand side is maximized (w.r.t.  $z$ ) when  $z = \mathbf{L}^{-1} (\nabla f(y) - \nabla f(x))$ . Plugging it in, we get

$$\frac{1}{2} \|\nabla f(x) - \nabla f(y)\|_{\mathbf{L}^{-1}}^2 \leq f(x) - f(y) - \langle \nabla f(y), x - y \rangle. \quad (29)$$

By symmetry we can also obtain

$$\frac{1}{2} \|\nabla f(y) - \nabla f(x)\|_{\mathbf{L}^{-1}}^2 \leq f(y) - f(x) - \langle \nabla f(x), y - x \rangle.$$

Adding (29) and its counterpart together, we get

$$\|\nabla f(x) - \nabla f(y)\|_{\mathbf{L}^{-1}}^2 \leq \langle \nabla f(x) - \nabla f(y), x - y \rangle. \quad (30)$$

Combing (30) and (26), it follows

$$\|\nabla f(x) - \nabla f(y)\|_{\mathbf{L}^{-1}}^2 \leq \|x - y\|_{\mathbf{L}}^2.$$

Note that  $\mathbf{L}$  and  $\mathbf{L}^{-1}$  are both positive definite matrices, so it is equivalent to

$$\|\nabla f(x) - \nabla f(y)\|_{\mathbf{L}^{-1}} \leq \|x - y\|_{\mathbf{L}}.$$

This completes the proof.

### B.3.7 PROOF OF PROPOSITION 7

Let us start with picking any two points  $x, y \in \mathbb{R}^d$ . With the matrix  $\mathbf{L}$ -Lipschitzness of the gradient of function  $f$ , we have

$$\|\nabla f(x) - \nabla f(y)\|_{\mathbf{L}^{-1}}^2 \leq \|x - y\|_{\mathbf{L}}^2.$$

This implies

$$(x - y)^\top \mathbf{L}(x - y) - (\nabla f(x) - \nabla f(y))^\top \mathbf{L}^{-1} (\nabla f(x) - \nabla f(y)) \geq 0.$$

Define function  $f(\mathbf{X}) := a^\top \mathbf{X} a - b^\top \mathbf{X}^{-1} b$  for  $\mathbf{X} \in \mathbb{S}_{++}^d$ , where  $a, b \in \mathbb{R}^d$  are fixed vectors. Then  $f$  is monotone increasing in  $\mathbf{X}$ . This can be shown in the following way, picking two matrices  $\mathbf{X}_1, \mathbf{X}_2 \in \mathbb{S}_{++}^d$ , where  $\mathbf{X}_1 \succeq \mathbf{X}_2$ . It is easy to see that  $-\mathbf{X}_1^{-1} \succeq -\mathbf{X}_2^{-1}$ , since from Fact 3 the map  $\mathbf{X} \mapsto -\mathbf{X}^{-1}$  is monotone increasing for  $\mathbf{X} \in \mathbb{S}_{++}^d$ . Thus,

$$\begin{aligned} f(\mathbf{X}_1) - f(\mathbf{X}_2) &= (x - y)^\top (\mathbf{X}_1 - \mathbf{X}_2) (x - y) \\ &\quad + (\nabla f(x) - \nabla f(y))^\top (-\mathbf{X}_1^{-1} - (-\mathbf{X}_2^{-1})) (\nabla f(x) - \nabla f(y)) \\ &\geq 0. \end{aligned}$$

As a result,  $f(\lambda_{\max}(\mathbf{L}) \cdot \mathbf{I}_d) \geq f(\mathbf{L}) \geq 0$ , due to the fact that  $\lambda_{\max}(\mathbf{L}) \cdot \mathbf{I}_d \succeq \mathbf{L}$ . It remains to notice that

$$f(\lambda_{\max}(\mathbf{L}) \cdot \mathbf{I}_d) = \lambda_{\max}(\mathbf{L}) \|x - y\|^2 - \frac{1}{\lambda_{\max}(\mathbf{L})} \|\nabla f(x) - \nabla f(y)\|^2 \geq 0,$$

which yields

$$\|\nabla f(x) - \nabla f(y)\|^2 \leq \lambda_{\max}^2(\mathbf{L}) \|x - y\|^2.$$

Since we are working with  $\mathbf{L} \in \mathbb{S}_{++}^d$ , the above inequality implies

$$\|\nabla f(x) - \nabla f(y)\| \leq \lambda_{\max}(\mathbf{L}) \|x - y\|.$$

This completes the proof.

## C ANALYSIS OF det-MARINA

We first state three technical lemmas. This first lemma is a slightly different version of (Li et al., 2021, Lemma 2).

**Lemma 1.** Assume that function  $f$  is  $L$  smooth, and  $x^{k+1} = x^k - \mathbf{D} \cdot g^k$ , where  $\mathbf{D} \in \mathbb{S}_{++}^d$ . Then we will have

$$f(x^{k+1}) \leq f(x^k) - \frac{1}{2} \|\nabla f(x^k)\|_{\mathbf{D}}^2 + \frac{1}{2} \|g^k - \nabla f(x^k)\|_{\mathbf{D}}^2 - \frac{1}{2} \|x^{k+1} - x^k\|_{\mathbf{D}^{-1} - \mathbf{L}}. \quad (31)$$

The following lemma is obtained for any sketch matrix  $\mathbf{S} \in \mathbb{S}_+^d$  and any two positive definite matrices  $\mathbf{D}$  and  $\mathbf{L}$ .

**Lemma 2.** (Property of sketch matrix) For any sketch matrix  $\mathbf{S} \in \mathbb{S}_+^d$ , a vector  $t \in \mathbb{R}^d$ , and matrices  $\mathbf{D}, \mathbf{L} \in \mathbb{S}_{++}^d$ , we have

$$\mathbb{E} \left[ \|\mathbf{S}t - t\|_{\mathbf{D}}^2 \right] \leq \lambda_{\max} \left( \mathbf{L}^{\frac{1}{2}} (\mathbb{E}[\mathbf{S}\mathbf{D}\mathbf{S}] - \mathbf{D}) \mathbf{L}^{\frac{1}{2}} \right) \cdot \|t\|_{\mathbf{L}^{-1}}^2. \quad (32)$$

### C.1 PROOF OF THEOREM 1

**Proof of Theorem 1.** According to Lemma 1, we have

$$\mathbb{E} [f(x^{k+1})] \leq \mathbb{E} [f(x^k)] - \mathbb{E} \left[ \frac{1}{2} \|\nabla f(x^k)\|_{\mathbf{D}}^2 \right] + \mathbb{E} \left[ \frac{1}{2} \|g^k - \nabla f(x^k)\|_{\mathbf{D}}^2 \right] - \mathbb{E} \left[ \frac{1}{2} \|x^{k+1} - x^k\|_{\mathbf{D}^{-1} - \mathbf{L}}^2 \right]. \quad (33)$$

We then use the definition of  $g^{k+1}$  to derive an upper bound for  $\mathbb{E} \left[ \|g^{k+1} - \nabla f(x^{k+1})\|_{\mathbf{D}}^2 \right]$ . Notice that,

$$g^{k+1} = \begin{cases} \nabla f(x^{k+1}) & \text{with probability } p, \\ g^k + \frac{1}{n} \sum_{i=1}^n \mathbf{S}_i^k (\nabla f_i(x^{k+1}) - \nabla f_i(x^k)) & \text{with probability } 1 - p. \end{cases}$$

As a result, from the tower property,

$$\begin{aligned} & \mathbb{E} \left[ \|g^{k+1} - \nabla f(x^{k+1})\|_{\mathbf{D}}^2 \mid x^{k+1}, x^k \right] \\ &= \mathbb{E} \left[ \mathbb{E} \left[ \|g^{k+1} - \nabla f(x^{k+1})\|_{\mathbf{D}}^2 \mid x^{k+1}, x^k, c_k \right] \right] \\ &= p \cdot \|\nabla f(x^{k+1}) - \nabla f(x^{k+1})\|_{\mathbf{D}}^2 \\ &\quad + (1-p) \cdot \mathbb{E} \left[ \left\| g^k + \frac{1}{n} \sum_{i=1}^n \mathbf{S}_i^k (\nabla f_i(x^{k+1}) - \nabla f_i(x^k)) - \nabla f(x^{k+1}) \right\|_{\mathbf{D}}^2 \mid x^{k+1}, x^k \right] \\ &= (1-p) \cdot \mathbb{E} \left[ \left\| g^k + \frac{1}{n} \sum_{i=1}^n \mathbf{S}_i^k (\nabla f_i(x^{k+1}) - \nabla f_i(x^k)) - \nabla f(x^{k+1}) \right\|_{\mathbf{D}}^2 \mid x^{k+1}, x^k \right]. \end{aligned}$$

Using Fact 2, we have

$$\begin{aligned} & \mathbb{E} \left[ \|g^{k+1} - \nabla f(x^{k+1})\|_{\mathbf{D}}^2 \mid x^{k+1}, x^k \right] \\ &= (1-p) \cdot \mathbb{E} \left[ \left\| \frac{1}{n} \sum_{i=1}^n \mathbf{S}_i^k (\nabla f_i(x^{k+1}) - \nabla f_i(x^k)) - (\nabla f(x^{k+1}) - \nabla f(x^k)) \right\|_{\mathbf{D}}^2 \mid x^{k+1}, x^k \right] \\ &\quad + (1-p) \cdot \|g^k - \nabla f(x^k)\|_{\mathbf{D}}^2 \\ &= (1-p) \cdot \mathbb{E} \left[ \left\| \frac{1}{n} \sum_{i=1}^n (\mathbf{S}_i^k (\nabla f_i(x^{k+1}) - \nabla f_i(x^k)) - (\nabla f_i(x^{k+1}) - \nabla f_i(x^k))) \right\|_{\mathbf{D}}^2 \mid x^{k+1}, x^k \right] \\ &\quad + (1-p) \cdot \|g^k - \nabla f(x^k)\|_{\mathbf{D}}^2. \end{aligned}$$

Notice that the sketch matrix is unbiased, thus we have

$$\mathbb{E} [\mathbf{S}_i^k (\nabla f_i(x^{k+1}) - \nabla f_i(x^k)) \mid x^{k+1}, x^k] = \nabla f_i(x^{k+1}) - \nabla f_i(x^k),$$

and any two random vectors in the set  $\{\mathbf{S}_i^k (\nabla f_i(x^{k+1}) - \nabla f_i(x^k))\}_{i=1}^n$  are independent from each other, if  $x^{k+1}$  and  $x^k$  are fixed. Therefore, we have

$$\begin{aligned} & \mathbb{E} \left[ \|g^{k+1} - \nabla f(x^{k+1})\|_{\mathbf{D}}^2 \mid x^{k+1}, x^k \right] \\ &= \frac{1-p}{n^2} \sum_{i=1}^n \mathbb{E} \left[ \|\mathbf{S}_i^k (\nabla f_i(x^{k+1}) - \nabla f_i(x^k)) - (\nabla f_i(x^{k+1}) - \nabla f_i(x^k))\|_{\mathbf{D}}^2 \mid x^{k+1}, x^k \right] \\ &+ (1-p) \cdot \|g^k - \nabla f(x^k)\|_{\mathbf{D}}^2. \end{aligned} \quad (34)$$

Lemma 2 yields

$$\begin{aligned} & \mathbb{E} \left[ \|\mathbf{S}_i^k (\nabla f_i(x^{k+1}) - \nabla f_i(x^k)) - (\nabla f_i(x^{k+1}) - \nabla f_i(x^k))\|_{\mathbf{D}}^2 \mid x^{k+1}, x^k \right] \\ & \leq \lambda_{\max} \left( \mathbf{L}_i^{\frac{1}{2}} (\mathbb{E} [\mathbf{S}_i^k \mathbf{D} \mathbf{S}_i^k] - \mathbf{D}) \mathbf{L}_i^{\frac{1}{2}} \right) \|\nabla f_i(x^{k+1}) - \nabla f_i(x^k)\|_{\mathbf{L}_i^{-1}}^2. \end{aligned} \quad (35)$$

Assumption 3 implies

$$\begin{aligned} & \mathbb{E} \left[ \|\mathbf{S}_i^k (\nabla f_i(x^{k+1}) - \nabla f_i(x^k)) - (\nabla f_i(x^{k+1}) - \nabla f_i(x^k))\|_{\mathbf{D}}^2 \mid x^{k+1}, x^k \right] \\ & \leq \lambda_{\max} \left( \mathbf{L}_i^{\frac{1}{2}} (\mathbb{E} [\mathbf{S}_i^k \mathbf{D} \mathbf{S}_i^k] - \mathbf{D}) \mathbf{L}_i^{\frac{1}{2}} \right) \|x^{k+1} - x^k\|_{\mathbf{L}_i}^2. \end{aligned} \quad (36)$$

Plugging back (36) into (34), we deduce

$$\begin{aligned} & \mathbb{E} \left[ \|g^{k+1} - \nabla f(x^{k+1})\|_{\mathbf{D}}^2 \mid x^{k+1}, x^k \right] \\ & \leq \frac{1-p}{n^2} \sum_{i=1}^n \lambda_{\max} \left( \mathbf{L}_i^{\frac{1}{2}} (\mathbb{E} [\mathbf{S}_i^k \mathbf{D} \mathbf{S}_i^k] - \mathbf{D}) \mathbf{L}_i^{\frac{1}{2}} \right) \|x^{k+1} - x^k\|_{\mathbf{L}_i}^2 + (1-p) \cdot \|g^k - \nabla f(x^k)\|_{\mathbf{D}}^2. \end{aligned}$$

Replacing  $\mathbf{L}_i^{-1}$  with  $\mathbf{L}^{-1/2} \mathbf{L}^{1/2} \mathbf{L}_i^{-1} \mathbf{L}^{1/2} \mathbf{L}^{-1/2}$ , we then rewrite the  $\mathbf{L}_i$ -norm in the first term of RHS by the  $\mathbf{L}$ -norm:

$$\begin{aligned} & \mathbb{E} \left[ \|g^{k+1} - \nabla f(x^{k+1})\|_{\mathbf{D}}^2 \mid x^{k+1}, x^k \right] \\ &= \frac{1-p}{n^2} \sum_{i=1}^n \lambda_{\max} \left( \mathbf{L}_i^{\frac{1}{2}} (\mathbb{E} [\mathbf{S}_i^k \mathbf{D} \mathbf{S}_i^k] - \mathbf{D}) \mathbf{L}_i^{\frac{1}{2}} \right) \left( \mathbf{L}_i^{\frac{1}{2}} (x^{k+1} - x^k) \right)^\top \mathbf{L}^{-\frac{1}{2}} \mathbf{L}_i \mathbf{L}^{-\frac{1}{2}} \left( \mathbf{L}_i^{\frac{1}{2}} (x^{k+1} - x^k) \right) \\ &+ (1-p) \cdot \|g^k - \nabla f(x^k)\|_{\mathbf{D}}^2 \\ &\leq \frac{1-p}{n^2} \sum_{i=1}^n \lambda_{\max} \left( \mathbf{L}_i^{\frac{1}{2}} (\mathbb{E} [\mathbf{S}_i^k \mathbf{D} \mathbf{S}_i^k] - \mathbf{D}) \mathbf{L}_i^{\frac{1}{2}} \right) \cdot \lambda_{\max} \left( \mathbf{L}^{-\frac{1}{2}} \mathbf{L}_i \mathbf{L}^{-\frac{1}{2}} \right) \|x^{k+1} - x^k\|_{\mathbf{L}}^2 \\ &+ (1-p) \cdot \|g^k - \nabla f(x^k)\|_{\mathbf{D}}^2. \end{aligned}$$

We further use Fact 5 to upper bound  $\lambda_{\max} \left( \mathbf{L}_i^{\frac{1}{2}} (\mathbb{E} [\mathbf{S}_i^k \mathbf{D} \mathbf{S}_i^k] - \mathbf{D}) \mathbf{L}_i^{\frac{1}{2}} \right)$  by the product of  $\lambda_{\max}(\mathbf{L}_i)$  and  $\lambda_{\max}(\mathbb{E} [\mathbf{S}_i^k \mathbf{D} \mathbf{S}_i^k] - \mathbf{D})$ . This allows us to simplify the expression since  $\lambda_{\max}(\mathbb{E} [\mathbf{S}_i^k \mathbf{D} \mathbf{S}_i^k] - \mathbf{D})$  is independent of the index  $i$ . Notice that we have already defined

$$R(\mathbf{D}, \mathcal{S}) = \frac{1}{n} \sum_{i=1}^n \lambda_{\max}(\mathbb{E} [\mathbf{S}_i^k \mathbf{D} \mathbf{S}_i^k] - \mathbf{D}) \cdot \lambda_{\max}(\mathbf{L}_i) \cdot \lambda_{\max} \left( \mathbf{L}^{-\frac{1}{2}} \mathbf{L}_i \mathbf{L}^{-\frac{1}{2}} \right).$$

Taking expectation, using tower property and using the definition above, we deduce

$$\mathbb{E} \left[ \|g^{k+1} - \nabla f(x^{k+1})\|_{\mathbf{D}}^2 \right] \leq \frac{(1-p) \cdot R(\mathbf{D}, \mathcal{S})}{n} \mathbb{E} \left[ \|x^{k+1} - x^k\|_{\mathbf{L}}^2 \right] + (1-p) \mathbb{E} \left[ \|g^k - \nabla f(x^k)\|_{\mathbf{D}}^2 \right]. \quad (37)$$



We construct the Lyapunov function  $\Phi_k$  as follows,

$$\Phi_k = f(x^k) - f^* + \frac{1}{2p} \|g^k - \nabla f(x^k)\|_{\mathbf{D}}^2. \quad (38)$$

Using (33) and (37), we are able to get

$$\begin{aligned} \mathbb{E}[\Phi_{k+1}] &\leq \mathbb{E}[f(x^k) - f^*] - \frac{1}{2}\mathbb{E}[\|\nabla f(x^k)\|_{\mathbf{D}}^2] + \frac{1}{2}\mathbb{E}[\|g^k - \nabla f(x^k)\|_{\mathbf{D}}^2] - \frac{1}{2}\mathbb{E}[\|x^{k+1} - x^k\|_{\mathbf{D}^{-1}-\mathbf{L}}^2] \\ &\quad + \frac{1}{2p} \left[ \frac{(1-p) \cdot R(\mathbf{D}, \mathcal{S})}{n} \mathbb{E}[\|x^{k+1} - x^k\|_{\mathbf{L}}^2] + (1-p) \cdot \mathbb{E}[\|g^k - \nabla f(x^k)\|_{\mathbf{D}}^2] \right] \\ &= \mathbb{E}[\Phi_k] - \frac{1}{2}\mathbb{E}[\|\nabla f(x^k)\|_{\mathbf{D}}^2] \\ &\quad + \left( \frac{(1-p) \cdot R(\mathbf{D}, \mathcal{S})}{2np} \mathbb{E}[\|x^{k+1} - x^k\|_{\mathbf{L}}^2] - \frac{1}{2}\mathbb{E}[\|x^{k+1} - x^k\|_{\mathbf{D}^{-1}-\mathbf{L}}^2] \right) \\ &= \mathbb{E}[\Phi_k] - \frac{1}{2}\mathbb{E}[\|\nabla f(x^k)\|_{\mathbf{D}}^2] \\ &\quad + \frac{1}{2} \left( \frac{(1-p) \cdot R(\mathbf{D}, \mathcal{S})}{np} \mathbb{E}[\|x^{k+1} - x^k\|_{\mathbf{L}}^2] - \mathbb{E}[\|x^{k+1} - x^k\|_{\mathbf{D}^{-1}-\mathbf{L}}^2] \right). \end{aligned}$$

We can rewrite the last term as

$$\mathbb{E} \left[ (x^{k+1} - x^k)^\top \left[ \frac{(1-p) \cdot R(\mathbf{D}, \mathcal{S})}{np} \mathbf{L} + \mathbf{L} - \mathbf{D}^{-1} \right] (x^{k+1} - x^k) \right]. \quad (39)$$

We require the matrix in between to be negative semi-definite, which is

$$\mathbf{D}^{-1} \succeq \left( \frac{(1-p) \cdot R(\mathbf{D}, \mathcal{S})}{np} + 1 \right) \mathbf{L}.$$

This leads to the result that the expression (39) is always non-positive. After dropping the last term, the relation between  $\mathbb{E}[\Phi_{k+1}]$  and  $\mathbb{E}[\Phi_k]$  becomes

$$\mathbb{E}[\Phi_{k+1}] \leq \mathbb{E}[\Phi_k] - \frac{1}{2}\mathbb{E}[\|\nabla f(x^k)\|_{\mathbf{D}}^2]. \quad (40)$$

Unrolling this recurrence, we get

$$\frac{1}{K} \sum_{k=0}^{K-1} \mathbb{E}[\|\nabla f(x^k)\|_{\mathbf{D}}^2] \leq \frac{2(\mathbb{E}[\Phi_0] - \mathbb{E}[\Phi_K])}{K}. \quad (41)$$

The left hand side can viewed as  $\mathbb{E}[\|\nabla f(\tilde{x}^K)\|_{\mathbf{D}}^2]$ , where  $\tilde{x}^K$  is drawn uniformly at random from  $\{x_k\}_{k=0}^{K-1}$ . From  $\Phi_K > 0$ , we obtain

$$\begin{aligned} \frac{2(\mathbb{E}[\Phi_0] - \mathbb{E}[\Phi_K])}{K} &\leq \frac{2\Phi_0}{K} \\ &= \frac{2 \left( f(x^0) - f^* + \frac{1}{2p} \|g^0 - \nabla f(x^0)\|_{\mathbf{D}}^2 \right)}{K} \\ &= \frac{2(f(x^0) - f^*)}{K}. \end{aligned}$$

Plugging in the simplified result into (41), and performing determinant normalization, we get

$$\mathbb{E} \left[ \|\nabla f(\tilde{x}^K)\|_{\frac{\mathbf{D}}{\det(\mathbf{D})^{1/d}}}^2 \right] \leq \frac{2(f(x^0) - f^*)}{\det(\mathbf{D})^{1/d} K}. \quad (42)$$

This completes the proof.  $\square$

A remark on the convergence result obtained in the proof of Theorem 1 is given here,

**Remark 7.** We can achieve a slightly more refined stepsize condition than (8) for  $\det$ -MARINA, which is given as follows

$$\mathbf{D} \succeq \left( \frac{(1-p) \cdot \tilde{R}(\mathbf{D}, \mathcal{S})}{np} + 1 \right) \mathbf{L}, \quad (43)$$

where

$$\tilde{R}(\mathbf{D}, \mathcal{S}) := \frac{1}{n} \sum_{i=1}^n \lambda_{\max} \left( \mathbf{L}_i^{\frac{1}{2}} \left( \mathbb{E} [\mathbf{S}_i^k \mathbf{D} \mathbf{S}_i^k] - \mathbf{D} \right) \mathbf{L}_i^{\frac{1}{2}} \right) \cdot \lambda_{\max} \left( \mathbf{L}^{-\frac{1}{2}} \mathbf{L}_i \mathbf{L}^{-\frac{1}{2}} \right).$$

This is obtained if we do not use Fact 5 to upper bound  $\lambda_{\max} \left( \mathbf{L}_i^{\frac{1}{2}} \left( \mathbb{E} [\mathbf{S}_i^k \mathbf{D} \mathbf{S}_i^k] - \mathbf{D} \right) \mathbf{L}_i^{\frac{1}{2}} \right)$  by the product of  $\lambda_{\max}(\mathbf{L}_i)$  and  $\lambda_{\max}(\mathbb{E}[\mathbf{S}_i^k \mathbf{D} \mathbf{S}_i^k] - \mathbf{D})$ . However, (43) results in a condition that is much harder to solve even if we assume  $\mathbf{D} = \gamma \cdot \mathbf{W}$ . So instead of using the more refined condition (43), we turn to (8). Notice that both of the two conditions (43) and (8) reduce to the stepsize condition for MARINA in the scalar setting.

## C.2 COMPARISON OF DIFFERENT STEPSIZES

In Corollary 2, we focus on the special stepsize where we fix  $\mathbf{W} = \mathbf{L}^{-1}$ , and show that in this case  $\det$ -MARINA always beats MARINA in terms of both iteration and communication complexities. However, other choices for  $\mathbf{W}$  are also possible. Specifically, we consider the cases where  $\mathbf{W} = \text{diag}^{-1}(\mathbf{L})$  and  $\mathbf{W} = \mathbf{I}_d$ .

### C.2.1 THE DIAGONAL CASE

We consider  $\mathbf{W} = \text{diag}^{-1}(\mathbf{L})$ . The following corollary describes the optimal stepsize and the iteration complexity.

**Corollary 4.** If we take  $\mathbf{W} = \text{diag}^{-1}(\mathbf{L})$  in Corollary 1, then the optimal stepsize satisfies

$$\mathbf{D}_{\text{diag}^{-1}(\mathbf{L})}^* = \frac{2}{1 + \sqrt{1 + 4\alpha\beta \cdot \Lambda_{\text{diag}^{-1}(\mathbf{L}), \mathcal{S}}}} \cdot \text{diag}^{-1}(\mathbf{L}). \quad (44)$$

This stepsize results in a better iteration complexity of  $\det$ -MARINA compared to scalar MARINA.

From this corollary we know that  $\det$ -MARINA has a better iteration complexity when  $\mathbf{W} = \text{diag}^{-1}(\mathbf{L})$ . And since the same sketch is used for MARINA and  $\det$ -MARINA, the communication complexity is improved as well. However, in general there is no clear relation between the iteration complexity of  $\mathbf{W} = \mathbf{L}^{-1}$  case and  $\mathbf{W} = \text{diag}^{-1}(\mathbf{L})$  case. This is also confirmed by one of our experiments, see Figure 5 to see the comparison of  $\det$ -MARINA using optimal stepsizes in different cases.

### C.2.2 THE IDENTITY CASE

In this setting,  $\mathbf{W}$  is the  $d$ -dimensional identity matrix  $\mathbf{I}_d$ . Then the stepsize of our algorithm reduces to a scalar  $\gamma$ , where  $\gamma$  is determined through Corollary 1. Notice that in this case we do not reduce to the standard MARINA case because we are still using the matrix Lipschitz gradient assumption with  $\mathbf{L} \in \mathbb{S}_{++}^d$ .

**Corollary 5.** If we take  $\mathbf{W} = \mathbf{I}_d$ , the optimal stepsize is given by

$$\mathbf{D}_{\mathbf{I}_d}^* = \frac{2}{1 + \sqrt{1 + 4\alpha\beta \frac{1}{\lambda_{\max}(\mathbf{L})} \cdot \omega}} \cdot \frac{\mathbf{I}_d}{\lambda_{\max}(\mathbf{L})}. \quad (45)$$

This stepsize results in a better iteration complexity of  $\det$ -MARINA compared to scalar MARINA.

The result in this corollary tells us that using scalar stepsize with matrix Lipschitz gradient assumption alone can result in acceleration of MARINA. However, the use of matrix stepsize allows us to also take into consideration the "structure" of the stepsize, thus allows more flexibility. When the structure of the stepsize is chosen properly, combining matrix gradient Lipschitzness and matrix stepsize can result in a faster rate, as it can also be observed from the experiments in Figure 5. The choices of  $\mathbf{W}$  we consider here are in some sense inspired by the matrix stepsize GD, where the optimal stepsize is  $\mathbf{L}^{-1}$ . In general, how to identify the best structure for the matrix stepsize remains an open problem.

### C.3 PROOFS OF THE COROLLARIES

#### C.3.1 PROOF OF COROLLARY 1

We start with rewriting condition (8) as

$$\left( \frac{1-p}{np} \cdot R(\mathbf{D}, \mathcal{S}) + 1 \right) \mathbf{D}^{\frac{1}{2}} \mathbf{L} \mathbf{D}^{\frac{1}{2}} \preceq \mathbf{I}_d.$$

Plugging in the definition of  $R(\mathbf{D}, \mathcal{S})$  and  $\mathbf{D} = \gamma \mathbf{W}$ , we get

$$\gamma \left( \frac{1-p}{np} \cdot \frac{1}{n} \sum_{i=1}^n \lambda_{\max}(\mathbf{L}_i) \lambda_{\max}(\mathbf{L}^{-1} \mathbf{L}_i) \cdot \lambda_{\max}(\mathbb{E}[\mathbf{S}_i^k \mathbf{W} \mathbf{S}_i^k] - \mathbf{W}) \cdot \gamma + 1 \right) \mathbf{W}^{\frac{1}{2}} \mathbf{L} \mathbf{W}^{\frac{1}{2}} \preceq \mathbf{I}_d.$$

This generalized inequality is equivalent to the following inequality,

$$\gamma \left( \frac{1-p}{np} \cdot \frac{1}{n} \sum_{i=1}^n \lambda_{\max}(\mathbf{L}_i) \lambda_{\max}(\mathbf{L}^{-1} \mathbf{L}_i) \cdot \lambda_{\max}(\mathbb{E}[\mathbf{S}_i^k \mathbf{W} \mathbf{S}_i^k] - \mathbf{W}) \cdot \gamma + 1 \right) \cdot \lambda_{\max}(\mathbf{W}^{\frac{1}{2}} \mathbf{L} \mathbf{W}^{\frac{1}{2}}) \leq 1,$$

which is a quadratic inequality on  $\gamma$ . Notice that we have already defined

$$\begin{aligned} \alpha &= \frac{1-p}{np}; & \beta &= \frac{1}{n} \sum_{i=1}^n \lambda_{\max}(\mathbf{L}_i) \cdot \lambda_{\max}(\mathbf{L}^{-1} \mathbf{L}_i); \\ \Lambda_{\mathbf{W}, \mathcal{S}} &= \lambda_{\max}(\mathbb{E}[\mathbf{S}_i^k \mathbf{W} \mathbf{S}_i^k] - \mathbf{W}); & \lambda_{\mathbf{W}} &= \lambda_{\max}^{-1}(\mathbf{W}^{\frac{1}{2}} \mathbf{L} \mathbf{W}^{\frac{1}{2}}). \end{aligned}$$

As a result, the above inequality can be written equivalently as

$$\alpha \beta \Lambda_{\mathbf{W}, \mathcal{S}} \cdot \gamma^2 + \gamma - \lambda_{\mathbf{W}} \leq 0,$$

which yields the upper bound on  $\gamma$

$$\gamma \leq \frac{\sqrt{1 + 4\alpha\beta \cdot \Lambda_{\mathbf{W}, \mathcal{S}} \lambda_{\mathbf{W}}} - 1}{2\alpha\beta \cdot \Lambda_{\mathbf{W}, \mathcal{S}}}.$$

Since  $\sqrt{1 + 4\alpha\beta \cdot \Lambda_{\mathbf{W}, \mathcal{S}} \lambda_{\mathbf{W}}} + 1 > 0$ , we can simplify the result as

$$\gamma \leq \frac{2\lambda_{\mathbf{W}}}{1 + \sqrt{1 + 4\alpha\beta \cdot \Lambda_{\mathbf{W}, \mathcal{S}} \lambda_{\mathbf{W}}}}.$$

#### C.3.2 PROOF OF COROLLARY 2

The equation (16) directly follows from plugging  $\mathbf{W} = \mathbf{L}^{-1}$  into (14). The optimal stepsize is obtained as the product of  $\gamma$  and  $\mathbf{L}^{-1}$ . The iteration complexity of MARINA, according to Gorbunov et al. (2021), is

$$K \geq K_1 = \mathcal{O} \left( \frac{\Delta_0 L}{\varepsilon^2} \left( 1 + \sqrt{\frac{(1-p)\omega}{pn}} \right) \right). \quad (46)$$

On the other hand,

$$\det(\mathbf{L})^{\frac{1}{d}} \leq \lambda_{\max}(\mathbf{L}) = L. \quad (47)$$

In addition, using the inequality

$$\sqrt{1 + 4t} \leq 1 + 2\sqrt{t}, \quad (48)$$

which holds for any  $t \geq 0$ , we have the following bound

$$\frac{(1 + \sqrt{1 + 4\alpha\beta \cdot \Lambda_{\mathbf{L}^{-1}, \mathcal{S}}})}{2} \leq 1 + \sqrt{\alpha\beta \cdot \Lambda_{\mathbf{L}^{-1}, \mathcal{S}}}.$$

Next we prove that

$$1 + \sqrt{\alpha\beta \cdot \Lambda_{\mathbf{L}^{-1}, \mathcal{S}}} \leq 1 + \sqrt{\frac{(1-p)}{pn}} \cdot \omega, \quad (49)$$

which is equivalent to proving

$$\frac{1}{n} \sum_{i=1}^n \lambda_{\max}(\mathbf{L}_i) \lambda_{\max}(\mathbf{L}_i \mathbf{L}^{-1}) \cdot \lambda_{\max}(\mathbb{E}[\mathbf{S}_i^k \mathbf{L}^{-1} \mathbf{S}_i^k] - \mathbf{L}^{-1}) \leq \omega.$$

The left hand side can be upper bounded by,

$$\frac{1}{n} \sum_{i=1}^n \lambda_{\max}(\mathbf{L}_i) \lambda_{\max}(\mathbf{L}^{-1} \mathbf{L}_i) \cdot \lambda_{\max}(\mathbf{L}^{-1}) \cdot \frac{\lambda_{\max}(\mathbb{E}[\mathbf{S}_i^k \mathbf{L}^{-1} \mathbf{S}_i^k] - \mathbf{L}^{-1})}{\lambda_{\max}(\mathbf{L}^{-1})} \leq \frac{\lambda_{\max}(\mathbb{E}[\mathbf{S}_i^k \mathbf{L}^{-1} \mathbf{S}_i^k] - \mathbf{L}^{-1})}{\lambda_{\max}(\mathbf{L}^{-1})},$$

where the inequality is a consequence of Proposition 2. We further bound the last term with

$$\begin{aligned} \frac{\lambda_{\max}(\mathbb{E}[\mathbf{S}_i^k \mathbf{L}^{-1} \mathbf{S}_i^k] - \mathbf{L}^{-1})}{\lambda_{\max}(\mathbf{L}^{-1})} &= \lambda_{\max}\left(\mathbb{E}\left[\mathbf{S}_i^k \cdot \frac{\mathbf{L}^{-1}}{\lambda_{\max}(\mathbf{L}^{-1})} \cdot \mathbf{S}_i^k\right] - \frac{\mathbf{L}^{-1}}{\lambda_{\max}(\mathbf{L}^{-1})}\right) \\ &\leq \lambda_{\max}(\mathbb{E}[\mathbf{S}_i^k \mathbf{S}_i^k] - \mathbf{I}_d) \\ &=: \omega. \end{aligned}$$

Here, the last inequality is due to the monotone behavior of the mapping  $\mathbf{X} \mapsto \lambda_{\max}(\mathbb{E}[\mathbf{S}_i^k \mathbf{X} \mathbf{S}_i^k] - \mathbf{X})$  with  $\mathbf{X} \in \mathbb{S}_{++}^d$ , which can be shown as follows, let us pick any  $\mathbf{X}_1, \mathbf{X}_2 \in \mathbb{S}_{++}^d$  and  $\mathbf{X}_1 \preceq \mathbf{X}_2$ ,

$$(\mathbb{E}[\mathbf{S}_i^k \mathbf{X}_2 \mathbf{S}_i^k] - \mathbf{X}_2) - (\mathbb{E}[\mathbf{S}_i^k \mathbf{X}_1 \mathbf{S}_i^k] - \mathbf{X}_1) = \mathbb{E}[\mathbf{S}_i^k (\mathbf{X}_2 - \mathbf{X}_1) \mathbf{S}_i^k] - (\mathbf{X}_2 - \mathbf{X}_1) \succeq \mathbf{O}_d.$$

The above inequality is due to the convexity of the mapping  $\mathbf{S}_i^k \mapsto \mathbf{S}_i^k \mathbf{X} \mathbf{S}_i^k$ . As a result, we have

$$\lambda_{\max}(\mathbb{E}[\mathbf{S}_i^k \mathbf{X}_2 \mathbf{S}_i^k] - \mathbf{X}_2) \geq \lambda_{\max}(\mathbb{E}[\mathbf{S}_i^k \mathbf{X}_1 \mathbf{S}_i^k] - \mathbf{X}_1),$$

whenever  $\mathbf{X}_2 \succeq \mathbf{X}_1$ . Due to the fact that

$$\frac{\mathbf{L}^{-1}}{\lambda_{\max}(\mathbf{L}^{-1})} \preceq \mathbf{I}_d,$$

we have

$$\lambda_{\max}\left(\mathbb{E}\left[\mathbf{S}_i^k \cdot \frac{\mathbf{L}^{-1}}{\lambda_{\max}(\mathbf{L}^{-1})} \cdot \mathbf{S}_i^k\right] - \frac{\mathbf{L}^{-1}}{\lambda_{\max}(\mathbf{L}^{-1})}\right) \leq \lambda_{\max}(\mathbb{E}[\mathbf{S}_i^k \cdot \mathbf{I}_d \cdot \mathbf{S}_i^k] - \mathbf{I}_d) = \omega.$$

Combining (47) and (49), we know that the iteration complexity of det-MARINA is always better than that of MARINA.

### C.3.3 PROOF OF COROLLARY 3

Since we run the algorithm for  $K$  iterations, the number of bits sent in expectation should be

$$\mathcal{O}(d + K(pd + (1-p)\zeta_S)) = \mathcal{O}((Kp + 1)d + (1-p)K\zeta_S).$$

The special case where we choose  $p = \zeta_S/d$  indicates that

$$\alpha = \frac{1-p}{np} = \frac{1}{n} \left( \frac{d}{\zeta_S} - 1 \right).$$

In order to reach an error of  $\varepsilon^2$ , we need

$$K = \mathcal{O}\left(\frac{\Delta_0 \cdot \det(\mathbf{L})^{\frac{1}{d}}}{\varepsilon^2} \cdot \left(1 + \sqrt{1 + \frac{4\beta}{n} \left(\frac{d}{\zeta_S} - 1\right) \cdot \Lambda_{\mathbf{L}^{-1}, \mathbf{S}}}\right)\right),$$

which is the iteration complexity. Applying once again (48) and using the fact that  $p = \zeta_S/d$ , the communication complexity in this case is given by

$$\begin{aligned} &\mathcal{O}\left(d + \frac{\Delta_0 \cdot \det(\mathbf{L})^{\frac{1}{d}}}{\varepsilon^2} \cdot \left(1 + \sqrt{1 + \frac{4\beta}{n} \left(\frac{d}{\zeta_S} - 1\right) \cdot \Lambda_{\mathbf{L}^{-1}, \mathbf{S}}}\right) \cdot (pd + (1-p)\zeta_S)\right) \\ &\leq \mathcal{O}\left(d + \frac{2\Delta_0 \cdot \det(\mathbf{L})^{\frac{1}{d}}}{\varepsilon^2} \cdot \left(1 + \sqrt{\frac{\beta}{n} \left(\frac{d}{\zeta_S} - 1\right) \cdot \Lambda_{\mathbf{L}^{-1}, \mathbf{S}}}\right) \cdot (pd + (1-p)\zeta_S)\right) \\ &\leq \mathcal{O}\left(d + \frac{4\Delta_0 \cdot \det(\mathbf{L})^{\frac{1}{d}}}{\varepsilon^2} \cdot \left(\zeta_S + \sqrt{\frac{\beta \cdot \Lambda_{\mathbf{L}^{-1}, \mathbf{S}}}{n} \cdot \zeta_S(d - \zeta_S)}\right)\right). \end{aligned}$$

Ignoring the coefficient we get

$$\mathcal{O} \left( d + \frac{\Delta_0 \cdot \det(\mathbf{L})^{\frac{1}{d}}}{\varepsilon^2} \cdot \left( \zeta_S + \sqrt{\frac{\beta \cdot \Lambda_{\mathbf{L}^{-1}, \mathcal{S}}}{n} \cdot \zeta_S (d - \zeta_S)} \right) \right).$$

This completes the proof.

### C.3.4 PROOF OF COROLLARY 4

The proof is similar to the proof of Corollary 2. Applying Corollary 1, notice that in this case

$$\lambda_{\text{diag}^{-1}(\mathbf{L})} = \lambda_{\max}^{-1} \left( \text{diag}^{-\frac{1}{2}}(\mathbf{L}) \mathbf{L} \text{diag}^{-\frac{1}{2}}(\mathbf{L}) \right) = 1,$$

we can obtain  $\mathbf{D}_{\text{diag}^{-1}(\mathbf{L})}^*$ . The iteration complexity is thus given by

$$\mathcal{O} \left( \frac{\det(\text{diag}(\mathbf{L}))^{\frac{1}{d}} \cdot \Delta_0}{\varepsilon^2} \cdot \left( \frac{1 + \sqrt{1 + 4\alpha\beta\Lambda_{\text{diag}^{-1}(\mathbf{L}), \mathcal{S}}}}{2} \right) \right).$$

We now compare it to the iteration complexity of MARINA, which is given in (46). We know that each diagonal element  $\mathbf{L}_{jj}$  satisfies  $\mathbf{L}_{jj} \leq \lambda_{\max}(\mathbf{L}) = L$  for  $j = 1, \dots, d$ . As a result,

$$\det(\text{diag}(\mathbf{L}))^{\frac{1}{d}} \leq L. \quad (50)$$

From (48), we deduce

$$\frac{1 + \sqrt{1 + 4\alpha\beta \cdot \Lambda_{\text{diag}^{-1}(\mathbf{L}), \mathcal{S}}}}{2} \leq 1 + \sqrt{\alpha\beta \cdot \Lambda_{\text{diag}^{-1}(\mathbf{L}), \mathcal{S}}}.$$

Now, let us prove the below inequality

$$1 + \sqrt{\alpha\beta \cdot \Lambda_{\text{diag}^{-1}(\mathbf{L}), \mathcal{S}}} \leq 1 + \sqrt{\frac{(1-p)}{pn} \cdot \omega}. \quad (51)$$

The latter is equivalent to

$$\beta \cdot \Lambda_{\text{diag}^{-1}(\mathbf{L}), \mathcal{S}} \leq \omega.$$

Plugging in the definition of  $\beta$ ,  $\omega$  and  $\Lambda_{\text{diag}^{-1}(\mathbf{L}), \mathcal{S}}$  and using the relation given in Proposition 2, we obtain,

$$\lambda_{\max} \left( \mathbb{E} \left[ \mathbf{S}_i^k \frac{\text{diag}^{-1}(\mathbf{L})}{\lambda_{\max}(\mathbf{L}^{-1})} \mathbf{S}_i^k - \frac{\text{diag}^{-1}(\mathbf{L})}{\lambda_{\max}(\mathbf{L}^{-1})} \right] \right) \leq \lambda_{\max} \left( \mathbb{E} [\mathbf{S}_i^k \mathbf{I}_d \mathbf{S}_i^k] - \mathbf{I}_d \right).$$

Thus, it is enough to prove that

$$\frac{\text{diag}^{-1}(\mathbf{L})}{\lambda_{\max}(\mathbf{L}^{-1})} \preceq \mathbf{I}_d.$$

We can further simplify the above inequality as

$$\lambda_{\min}(\mathbf{L}) \leq \lambda_{\min}(\text{diag}(\mathbf{L})),$$

which is always true for any  $\mathbf{L} \in \mathbb{S}_{++}^d$ . Combining (50) and (51) we conclude the proof.

### C.3.5 PROOF OF COROLLARY 5

Using the explicit formula for the optimal stepsize  $\mathbf{D}_{\mathbf{I}_d}^*$ , we deduce the following iteration complexity for

$$\mathcal{O} \left( \frac{\lambda_{\max}(\mathbf{L}) \Delta_0}{\varepsilon^2} \cdot \left( \frac{1 + \sqrt{1 + 4\alpha\beta \frac{\omega}{\lambda_{\max}(\mathbf{L})}}}{2} \right) \right). \quad (52)$$

We first recall

$$\lambda_{\max}(\mathbf{L}) = L. \quad (53)$$

Using (48) we obtain

$$\frac{1 + \sqrt{1 + 4\alpha\beta \frac{\omega}{\lambda_{\max}(\mathbf{L})}}}{2} \leq 1 + \sqrt{\alpha\beta \frac{\omega}{\lambda_{\max}(\mathbf{L})}}.$$

The comparison of two iteration complexities, given in (52) and (46) reduces to

$$1 + \sqrt{\alpha\beta \frac{\omega}{\lambda_{\max}(\mathbf{L})}} \leq 1 + \sqrt{\frac{1-p}{np} \omega}. \quad (54)$$

This is equivalent to

$$\beta \cdot \frac{1}{\lambda_{\max}(\mathbf{L})} \leq 1.$$

Utilizing Proposition 2, the above inequality can be rewritten as

$$\frac{1}{\lambda_{\max}(\mathbf{L}^{-1}) \cdot \lambda_{\max}(\mathbf{L})} \leq 1,$$

which is exactly

$$\lambda_{\min}(\mathbf{L}) \leq \lambda_{\max}(\mathbf{L}).$$

This concludes the proof.

## D DISTRIBUTED det-CGD

This section is a brief summary of the distributed det-CGD algorithm and its theoretical analysis. The details can be found in Li et al. (2023).

The algorithm follows the standard FL paradigm. See the pseudocode in Algorithm 2.

---

### Algorithm 2 Distributed det-CGD

---

- 1: **Input:** Starting point  $x^0$ , stepsize matrix  $\mathbf{D}$ , number of iterations  $K$
  - 2: **for**  $k = 0, 1, 2, \dots, K - 1$  **do**
  - 3:   The devices in parallel:
  - 4:   sample  $\mathbf{S}_i^k \sim \mathcal{S}$ ;
  - 5:   compute  $\mathbf{S}_i^k \nabla f_i(x^k)$ ;
  - 6:   broadcast  $\mathbf{S}_i^k \nabla f_i(x^k)$ .
  - 7:   The server:
  - 8:   combines  $g^k = \frac{1}{n} \sum_{i=1}^n \mathbf{S}_i^k \nabla f_i(x^k)$ ;
  - 9:   computes  $x^{k+1} = x^k - \mathbf{D}g^k$ ;
  - 10:   broadcasts  $x^{k+1}$ .
  - 11: **end for**
  - 12: **Return:**  $x^K$
- 

Below is the main convergence result for the algorithm. Its proof can be found in Li et al. (2023)

**Theorem 2.** Suppose that  $f$  is  $L$ -smooth. Under the Assumptions 1,2, if the stepsize satisfies

$$\mathbf{DLD} \preceq \mathbf{D}, \quad (55)$$

then the following convergence bound is true for the iteration of Algorithm 2:

$$\min_{0 \leq k \leq K-1} \mathbb{E} \left[ \left\| \nabla f(x^k) \right\|_{\frac{\mathbf{D}}{\det(\mathbf{D})^{1/d}}}^2 \right] \leq \frac{2(1 + \frac{\lambda_{\mathbf{D}}}{n})^K (f(x^0) - f^*)}{\det(\mathbf{D})^{1/d} K} + \frac{2\lambda_{\mathbf{D}} \Delta^*}{\det(\mathbf{D})^{1/d} n}, \quad (56)$$

where  $\Delta^* := f^* - \frac{1}{n} \sum_{i=1}^n f_i^*$  and

$$\lambda_{\mathbf{D}} := \max_i \left\{ \lambda_{\max} \left( \mathbb{E} \left[ \mathbf{L}_i^{\frac{1}{2}} (\mathbf{S}_i^k - \mathbf{I}_d) \mathbf{DLD} (\mathbf{S}_i^k - \mathbf{I}_d) \mathbf{L}_i^{\frac{1}{2}} \right] \right) \right\}.$$

**Remark 8.** On the right hand side of (56) we observe that increasing  $K$  will only reduce the first term, that corresponds to the convergence error. Whereas, the second term, which does not depend on  $K$ , will remain constant, if the other parameters of the algorithm are fixed. This testifies to the neighborhood phenomenon which we discussed in Section 1.2.

**Remark 9.** If the stepsize satisfies the below conditions,

$$DLD \preceq D, \quad \lambda_D \leq \min \left\{ \frac{n}{K}, \frac{n\varepsilon^2}{4\Delta^*} \det(\mathbf{D})^{1/d} \right\}, \quad K \geq \frac{12(f(x^0) - f^*)}{\det(\mathbf{D})^{1/d} \varepsilon^2}, \quad (57)$$

then we obtain  $\varepsilon$ -stationary point.

One can see that in the convergence guarantee of  $\det$ -CGD in the distributed case, the result (56) is non variance reduced. Because of this limitation, in order to reach a  $\varepsilon$  stationary point, the stepsize condition in (57) is restrictive.

## E EXTENSION OF $\det$ -CGD2 IN MARINA FORM

In this section we want to extend  $\det$ -CGD2 into its variance reduced counterpart in MARINA form.

### E.1 EXTENSION OF $\det$ -CGD2 TO ITS VARIANCE REDUCED COUNTERPART

---

#### Algorithm 3 $\det$ -CGD2-VR

---

- 1: **Input:** starting point  $x^0$ , stepsize matrix  $\mathbf{D}$ , probability  $p \in (0, 1]$ , number of iterations  $K$
  - 2: Initialize  $g^0 = \mathbf{D} \cdot \nabla f(x^0)$
  - 3: **for**  $k = 0, 1, \dots, K - 1$  **do**
  - 4:   Sample  $c_k \sim \text{Be}(p)$
  - 5:   Broadcast  $g^k$  to all workers
  - 6:   **for**  $i = 1, 2, \dots$  in parallel **do**
  - 7:      $x^{k+1} = x^k - g^k$
  - 8:     Set  $g_i^{k+1} = \begin{cases} \mathbf{D} \cdot \nabla f_i(x^{k+1}) & \text{if } c_k = 1 \\ g^k + \mathbf{T}_i^k \mathbf{D} (\nabla f_i(x^{k+1}) - \nabla f_i(x^k)) & \text{if } c_k = 0 \end{cases}$
  - 9:   **end for**
  - 10:    $g^{k+1} = \frac{1}{n} \sum_{i=1}^n g_i^{k+1}$
  - 11: **end for**
  - 12: **Return:**  $\tilde{x}^K$  chosen uniformly at random from  $\{x^k\}_{k=0}^{K-1}$
- 

We call  $\det$ -MARINA as the extension of  $\det$ -CGD, and Algorithm 3 as the extension of  $\det$ -CGD2 due to the difference in the order of applying sketches and stepsize matrices. The key difference between  $\det$ -CGD ( $\det$ -CGD1) and  $\det$ -CGD2 is that in  $\det$ -CGD the gradient is sketched first and then multiplied by the stepsize, while for  $\det$ -CGD2, the gradient is multiplied by the stepsize first after which the product is sketched. The convergence for Algorithm 3 can be proved in a similar manner as the Theorem 1.

**Theorem 3.** Let Assumptions 1 and 3 hold, with the gradient of  $f$  being  $\mathbf{L}$ -Lipschitz. If the stepsize matrix  $\mathbf{D} \in \mathbb{S}_{++}^d$  satisfies

$$\mathbf{D}^{-1} \succeq \left( \frac{(1-p) \cdot R'(\mathbf{D}, \mathcal{S})}{np} + 1 \right) \mathbf{L},$$

where

$$R'(\mathbf{D}, \mathcal{S}) = \frac{1}{n} \sum_{i=1}^n \lambda_{\max} \left( \mathbf{D} \mathbb{E} [\mathbf{T}_i^k \mathbf{D}^{-1} \mathbf{T}_i^k] \mathbf{D} \mathbf{L}_i^{\frac{1}{2}} - \mathbf{L}_i^{\frac{1}{2}} \mathbf{D} \right) \cdot \lambda_{\max}(\mathbf{L}_i) \cdot \lambda_{\max} \left( \mathbf{L}^{-\frac{1}{2}} \mathbf{L}_i \mathbf{L}^{-\frac{1}{2}} \right).$$

Then after  $K$  iterations of Algorithm 3, we have

$$\mathbb{E} \left[ \left\| \nabla f(\tilde{x}^K) \right\|_{\frac{\mathbf{D}}{\det(\mathbf{D})^{1/d}}}^2 \right] \leq \frac{2(f(x^0) - f^*)}{\det(\mathbf{D})^{1/d} \cdot K}.$$



This is to say that in order to reach a  $\varepsilon$ -stationary point, we require

$$K \geq \frac{2(f(x^0) - f^*)}{\det(\mathbf{D})^{1/d} \cdot \varepsilon^2}.$$

If we look at the scalar case where  $\mathbf{D} = \gamma \cdot \mathbf{I}_d$ ,  $\mathbf{L}_i = L_i \cdot \mathbf{I}_d$  and  $\mathbf{L} = L \cdot \mathbf{I}_d$ , then the condition in Theorem 3 reduces to

$$\frac{(1-p)\omega L^2}{np} + L - \frac{1}{\gamma} \leq 0. \quad (58)$$

Notice that here  $\omega = \lambda_{\max} \left( \mathbb{E} \left[ (\mathbf{T}_i^k)^2 \right] \right) - 1$ , and we have  $L^2 = \frac{1}{n} \sum_{i=1}^n L_i^2$ , which is due to the relation given in Proposition 4. This condition coincides with the condition for convergence of MARINA. One may also check that, the update rule in Algorithm 3, is the same as MARINA in the scalar case. However, the condition given in Theorem 3 is not simpler than Theorem 1, contrary to the single-node case. We emphasize that Algorithm 3 is not suitable for the federated learning setting where the clients have limited resources. In order to perform the update, each client is required to store the stepsize matrix  $\mathbf{D}$  which is of size  $d \times d$ . In the over-parameterized regime, the dataset size is  $m \times d$  where  $m$  is the number of data samples, and we have  $d > m$ . This means that the stepsize matrix each client needs to store is even larger than the dataset itself, which is unacceptable given the limited resources each client has.

## E.2 ANALYSIS OF ALGORITHM 3

We first present two lemmas which are necessary for the proofs of Theorem 3.

**Lemma 3.** Assume that function  $f$  is  $L$ -smooth, and  $x^{k+1} = x^k - g^k$ , and matrix  $\mathbf{D} \in \mathbb{S}_{++}^d$ . Then we will have

$$f(x^{k+1}) \leq f(x^k) - \frac{1}{2} \|\nabla f(x^k)\|_{\mathbf{D}}^2 + \frac{1}{2} \|\mathbf{D} \cdot \nabla f(x^k) - g^k\|_{\mathbf{D}^{-1}}^2 - \frac{1}{2} \|x^{k+1} - x^k\|_{\mathbf{D}^{-1} - \mathbf{L}}^2. \quad (59)$$

Note that this lemma is formulated in a different way from Lemma 1 on purpose. It contains the squared norm of difference of  $g^k$  and  $\mathbf{D} \cdot \nabla f(x^k)$ , which facilitates the proof of convergence for Algorithm 3.

**Lemma 4.** For any sketch matrix  $\mathbf{T} \in \mathbb{S}_+^d$ , vector  $t \in \mathbb{R}^d$ , matrix  $\mathbf{D} \in \mathbb{S}_{++}^d$  and matrix  $\mathbf{L} \in \mathbb{S}_{++}^d$ , we have

$$\mathbb{E} \left[ \|\mathbf{T}\mathbf{D}t - \mathbf{D}t\|_{\mathbf{D}^{-1}}^2 \right] \leq \lambda_{\max} \left( \mathbf{L}^{\frac{1}{2}} \mathbf{D} \mathbb{E} [\mathbf{T}\mathbf{D}^{-1}\mathbf{T}] \mathbf{D}\mathbf{L}^{\frac{1}{2}} - \mathbf{L}^{\frac{1}{2}} \mathbf{D}\mathbf{L}^{\frac{1}{2}} \right) \|t\|_{\mathbf{L}^{-1}}^2. \quad (60)$$

## E.3 PROOF OF THEOREM 3

The proof given in this section for the convergence guarantee of Algorithm 3 is similar to the proof of Theorem 1 with some modifications.

**Proof of Theorem 3.** We start with Lemma 3,

$$\mathbb{E} [f(x^{k+1})] \leq \mathbb{E} [f(x^k)] - \mathbb{E} \left[ \frac{1}{2} \|\nabla f(x^k)\|_{\mathbf{D}}^2 \right] + \mathbb{E} \left[ \frac{1}{2} \|\mathbf{D} \cdot \nabla f(x^k) - g^k\|_{\mathbf{D}^{-1}}^2 \right] - \mathbb{E} \left[ \frac{1}{2} \|x^{k+1} - x^k\|_{\mathbf{D}^{-1} - \mathbf{L}}^2 \right]. \quad (61)$$

Now we do the same as Theorem 1 and look at the term  $\mathbb{E} \left[ \|\mathbf{D} \cdot \nabla f(x^{k+1}) - g^{k+1}\|_{\mathbf{D}^{-1}}^2 \right]$ . Recall that  $g^k$  here is given by

$$g^{k+1} = \begin{cases} \mathbf{D} \cdot \nabla f(x^{k+1}) & \text{with probability } p \\ g^k + \frac{1}{n} \sum_{i=1}^n \mathbf{T}_i^k \mathbf{D} (\nabla f_i(x^{k+1}) - \nabla f_i(x^k)) & \text{with probability } 1 - p. \end{cases}$$

As a result, we have

$$\begin{aligned}
& \mathbb{E} \left[ \|g^{k+1} - D\nabla f(x^{k+1})\|_{D^{-1}}^2 \mid x^{k+1}, x^k \right] \\
&= \mathbb{E} \left[ \mathbb{E} \left[ \|g^{k+1} - D\nabla f(x^{k+1})\|_{D^{-1}}^2 \mid x^{k+1}, x^k, c_k \right] \right] \\
&= p \cdot \|D\nabla f(x^{k+1}) - D\nabla f(x^k)\|_{D^{-1}}^2 \\
&\quad + (1-p) \cdot \mathbb{E} \left[ \left\| g^k + \frac{1}{n} \sum_{i=1}^n \mathbf{T}_i^k D (\nabla f_i(x^{k+1}) - \nabla f_i(x^k)) - D\nabla f(x^{k+1}) \right\|_{D^{-1}}^2 \mid x^{k+1}, x^k \right] \\
&= (1-p) \cdot \mathbb{E} \left[ \left\| g^k + \frac{1}{n} \sum_{i=1}^n \mathbf{T}_i^k D (\nabla f_i(x^{k+1}) - \nabla f_i(x^k)) - D\nabla f(x^{k+1}) \right\|_{D^{-1}}^2 \mid x^{k+1}, x^k \right].
\end{aligned}$$

Using Fact 2 with  $x = \frac{1}{n} \sum_{i=1}^n \mathbf{T}_i^k D (\nabla f_i(x^{k+1}) - \nabla f_i(x^k))$ ,  $c = D\nabla f(x^{k+1}) - g^k$ , we are able to obtain that

$$\begin{aligned}
& (1-p) \cdot \mathbb{E} \left[ \left\| g^k + \frac{1}{n} \sum_{i=1}^n \mathbf{T}_i^k D (\nabla f_i(x^{k+1}) - \nabla f_i(x^k)) - D\nabla f(x^{k+1}) \right\|_{D^{-1}}^2 \mid x^{k+1}, x^k \right] \\
&= (1-p) \cdot \mathbb{E} \left[ \left\| \frac{1}{n} \sum_{i=1}^n \mathbf{T}_i^k D (\nabla f_i(x^{k+1}) - \nabla f_i(x^k)) - D (\nabla f(x^{k+1}) - \nabla f(x^k)) \right\|_{D^{-1}}^2 \mid x^{k+1}, x^k \right] \\
&\quad + (1-p) \cdot \|g^k - \nabla f(x^k)\|_{D^{-1}}^2 \\
&= (1-p) \cdot \mathbb{E} \left[ \left\| \frac{1}{n} \sum_{i=1}^n [\mathbf{T}_i^k D (\nabla f_i(x^{k+1}) - \nabla f_i(x^k)) - D (\nabla f_i(x^{k+1}) - \nabla f_i(x^k))] \right\|_{D^{-1}}^2 \mid x^{k+1}, x^k \right] \\
&\quad + (1-p) \cdot \|g^k - \nabla f(x^k)\|_{D^{-1}}^2.
\end{aligned}$$

It is not hard to notice that for the sketch matrices we pick, the following identity holds due to the unbiasedness,

$$\mathbb{E} [\mathbf{T}_i^k D (\nabla f_i(x^{k+1}) - \nabla f_i(x^k)) \mid x^{k+1}, x^k] = D (\nabla f_i(x^{k+1}) - \nabla f_i(x^k)),$$

and any two random vectors in the set  $\{\mathbf{T}_i^k D (\nabla f_i(x^{k+1}) - \nabla f_i(x^k))\}_{i=1}^n$  are independent if  $x^{k+1}, x^k$  are fixed. As a result

$$\begin{aligned}
& \mathbb{E} \left[ \|g^{k+1} - D\nabla f(x^{k+1})\|_{D^{-1}}^2 \mid x^{k+1}, x^k \right] \\
&= \frac{1-p}{n^2} \sum_{i=1}^n \mathbb{E} \left[ \|\mathbf{T}_i^k (D\nabla f_i(x^{k+1}) - D\nabla f_i(x^k)) - (D\nabla f_i(x^{k+1}) - D\nabla f_i(x^k))\|_{D^{-1}}^2 \mid x^{k+1}, x^k \right] \\
&\quad + (1-p) \cdot \|g^k - D\nabla f(x^k)\|_{D^{-1}}^2. \tag{62}
\end{aligned}$$

For each term within the summation, can be further upper bounded using Lemma 4

$$\begin{aligned}
& \mathbb{E} \left[ \|\mathbf{T}_i^k (D\nabla f_i(x^{k+1}) - D\nabla f_i(x^k)) - (D\nabla f_i(x^{k+1}) - D\nabla f_i(x^k))\|_{D^{-1}}^2 \mid x^{k+1}, x^k \right] \\
&\leq \lambda_{\max} \left( L_i^{\frac{1}{2}} D \mathbb{E} [\mathbf{T}_i^k D^{-1} \mathbf{T}_i^k] D L_i^{\frac{1}{2}} - L_i^{\frac{1}{2}} D L_i^{\frac{1}{2}} \right) \|\nabla f_i(x^{k+1}) - \nabla f_i(x^k)\|_{L_i^{-1}}^2 \\
&\leq \lambda_{\max} \left( L_i^{\frac{1}{2}} D \mathbb{E} [\mathbf{T}_i^k D^{-1} \mathbf{T}_i^k] D L_i^{\frac{1}{2}} - L_i^{\frac{1}{2}} D L_i^{\frac{1}{2}} \right) \|x^{k+1} - x^k\|_{L_i}^2.
\end{aligned}$$

Where the last inequality is due to Assumption 3. Plugging back into (62), we get

$$\begin{aligned} & \mathbb{E} \left[ \|g^{k+1} - \mathbf{D}\nabla f(x^{k+1})\|_{\mathbf{D}^{-1}}^2 \mid x^{k+1}, x^k \right] \\ & \leq \frac{1-p}{n^2} \sum_{i=1}^n \lambda_{\max} \left( \mathbf{L}_i^{\frac{1}{2}} \mathbf{D} \mathbb{E} [\mathbf{T}_i^k \mathbf{D}^{-1} \mathbf{T}_i^k] \mathbf{D} \mathbf{L}_i^{\frac{1}{2}} - \mathbf{L}_i^{\frac{1}{2}} \mathbf{D} \mathbf{L}_i^{\frac{1}{2}} \right) \|x^{k+1} - x^k\|_{\mathbf{L}}^2 \\ & \quad + (1-p) \cdot \|g^k - \mathbf{D}\nabla f(x^k)\|_{\mathbf{D}^{-1}}^2 \end{aligned}$$

Applying the replacement trick from the proof of Theorem 1, we obtain

$$\begin{aligned} & \mathbb{E} \left[ \|g^{k+1} - \mathbf{D}\nabla f(x^{k+1})\|_{\mathbf{D}^{-1}}^2 \mid x^{k+1}, x^k \right] \\ & \leq \frac{1-p}{n^2} \sum_{i=1}^n \lambda_{\max} \left( \mathbf{L}_i^{\frac{1}{2}} \mathbf{D} \mathbb{E} [\mathbf{T}_i^k \mathbf{D}^{-1} \mathbf{T}_i^k] \mathbf{D} \mathbf{L}_i^{\frac{1}{2}} - \mathbf{L}_i^{\frac{1}{2}} \mathbf{D} \mathbf{L}_i^{\frac{1}{2}} \right) \\ & \quad \times \left\langle \mathbf{L}^{\frac{1}{2}} (x^{k+1} - x^k), \left( \mathbf{L}^{-\frac{1}{2}} \mathbf{L}_i \mathbf{L}^{-\frac{1}{2}} \right) \cdot \mathbf{L}^{\frac{1}{2}} (x^{k+1} - x^k) \right\rangle + (1-p) \cdot \|g^k - \mathbf{D}\nabla f(x^k)\|_{\mathbf{D}^{-1}}^2 \\ & \leq \frac{1-p}{n^2} \sum_{i=1}^n \lambda_{\max} \left( \mathbf{L}_i^{\frac{1}{2}} \mathbf{D} \mathbb{E} [\mathbf{T}_i^k \mathbf{D}^{-1} \mathbf{T}_i^k] \mathbf{D} \mathbf{L}_i^{\frac{1}{2}} - \mathbf{L}_i^{\frac{1}{2}} \mathbf{D} \mathbf{L}_i^{\frac{1}{2}} \right) \cdot \lambda_{\max} \left( \mathbf{L}^{-\frac{1}{2}} \mathbf{L}_i \mathbf{L}^{-\frac{1}{2}} \right) \|x^{k+1} - x^k\|_{\mathbf{L}}^2 \\ & \quad + (1-p) \cdot \|g^k - \mathbf{D}\nabla f(x^k)\|_{\mathbf{D}^{-1}}^2. \end{aligned}$$

Applying Fact 5, we obtain

$$\begin{aligned} & \mathbb{E} \left[ \|g^{k+1} - \mathbf{D}\nabla f(x^{k+1})\|_{\mathbf{D}^{-1}}^2 \mid x^{k+1}, x^k \right] \\ & \leq \frac{1-p}{n^2} \sum_{i=1}^n \lambda_{\max} \left( \mathbf{D} \mathbb{E} [\mathbf{T}_i^k \mathbf{D}^{-1} \mathbf{T}_i^k] \mathbf{D} - \mathbf{D} \right) \cdot \lambda_{\max} (\mathbf{L}_i) \cdot \lambda_{\max} \left( \mathbf{L}^{-\frac{1}{2}} \mathbf{L}_i \mathbf{L}^{-\frac{1}{2}} \right) \|x^{k+1} - x^k\|_{\mathbf{L}}^2 \\ & \quad + (1-p) \cdot \|g^k - \mathbf{D}\nabla f(x^k)\|_{\mathbf{D}^{-1}}^2. \end{aligned}$$

Recalling the definition of  $R'(\mathbf{D}, \mathcal{S})$ , the previous upper bound further simplifies to

$$\begin{aligned} & \mathbb{E} \left[ \|g^{k+1} - \mathbf{D}\nabla f(x^{k+1})\|_{\mathbf{D}^{-1}}^2 \mid x^{k+1}, x^k \right] \\ & \leq \frac{(1-p) \cdot R'(\mathbf{D}, \mathcal{S})}{n} \|x^{k+1} - x^k\|_{\mathbf{L}}^2 + (1-p) \cdot \|g^k - \mathbf{D}\nabla f(x^k)\|_{\mathbf{D}^{-1}}^2. \end{aligned}$$

Taking expectation again and using the tower property, we get

$$\begin{aligned} & \mathbb{E} \left[ \|g^{k+1} - \mathbf{D}\nabla f(x^{k+1})\|_{\mathbf{D}^{-1}}^2 \right] \\ & \leq \frac{(1-p) \cdot R'(\mathbf{D}, \mathcal{S})}{n} \mathbb{E} \left[ \|x^{k+1} - x^k\|_{\mathbf{L}}^2 \right] + (1-p) \cdot \mathbb{E} \left[ \|g^k - \mathbf{D}\nabla f(x^k)\|_{\mathbf{D}^{-1}}^2 \right]. \end{aligned} \quad (63)$$

Construct the Lyapunov function  $\Phi_k$  as follows,

$$\Phi_k = f(x^k) - f^* + \frac{1}{2p} \|g^k - \mathbf{D}\nabla f(x^k)\|_{\mathbf{D}^{-1}}^2.$$

Utilizing (61) and (63), we are able to get

$$\begin{aligned} \mathbb{E} [\Phi_{k+1}] & \leq \mathbb{E} [f(x^k) - f^*] - \frac{1}{2} \mathbb{E} \left[ \|\nabla f(x^k)\|_{\mathbf{D}}^2 \right] + \frac{1}{2} \mathbb{E} \left[ \|g^k - \mathbf{D}\nabla f(x^k)\|_{\mathbf{D}^{-1}}^2 \right] - \frac{1}{2} \mathbb{E} \left[ \|x^{k+1} - x^k\|_{\mathbf{D}^{-1}-\mathbf{L}} \right] \\ & \quad + \frac{1}{2p} \cdot \frac{(1-p)R'(\mathbf{D}, \mathcal{S})}{n} \mathbb{E} \left[ \|x^{k+1} - x^k\|_{\mathbf{L}}^2 \right] + \frac{1-p}{2p} \mathbb{E} \left[ \|g^k - \mathbf{D}\nabla f(x^k)\|_{\mathbf{D}^{-1}}^2 \right] \\ & = \mathbb{E} [\Phi_k] - \frac{1}{2} \mathbb{E} \left[ \|\nabla f(x^k)\|_{\mathbf{D}}^2 \right] \\ & \quad + \frac{1}{2} \left( \frac{(1-p)R'(\mathbf{D}, \mathcal{S})}{np} \mathbb{E} \left[ \|x^{k+1} - x^k\|_{\mathbf{L}}^2 \right] - \mathbb{E} \left[ \|x^{k+1} - x^k\|_{\mathbf{D}^{-1}-\mathbf{L}}^2 \right] \right). \end{aligned}$$

Now, notice that the last term in the above inequality is non-positive as guaranteed by the condition

$$\mathbf{D}^{-1} \succeq \left( \frac{(1-p)R'(\mathbf{D}, \mathcal{S})}{np} + 1 \right) \mathbf{L}.$$

This leads to the recurrence after ignoring the last term,

$$\mathbb{E}[\Phi_{k+1}] \leq \mathbb{E}[\Phi_k] - \frac{1}{2} \mathbb{E} \left[ \|\nabla f(x^k)\|_{\mathbf{D}}^2 \right].$$

Unrolling this recurrence relation, we get

$$\frac{1}{K} \sum_{k=0}^{K-1} \mathbb{E} \left[ \|\nabla f(x^k)\|_{\mathbf{D}}^2 \right] \leq \frac{2(\mathbb{E}[\Phi_0] - \mathbb{E}[\Phi_K])}{K}. \quad (64)$$

The left hand side can be viewed as average over  $\tilde{x}^K$ , which is drawn uniformly at random from  $\{x_k\}_{k=0}^{K-1}$ , while the right hand side can be simplified as

$$\begin{aligned} \frac{2(\mathbb{E}[\Phi_0] - \mathbb{E}[\Phi_K])}{K} &\leq \frac{2\Phi_0}{K} \\ &= \frac{2 \left( f(x^0) - f^* + \frac{1}{2p} \|g^0 - \nabla f(x^0)\|_{\mathbf{D}}^2 \right)}{K}. \end{aligned}$$

Recalling that  $g^0 = \nabla f(x^0)$  and performing determinant normalization as Li et al. (2023), we get

$$\mathbb{E} \left[ \left\| \nabla f(\tilde{x}^K) \right\|_{\frac{\mathbf{D}}{\det(\mathbf{D})^{1/d}}}^2 \right] \leq \frac{2(f(x^0) - f^*)}{\det(\mathbf{D})^{1/d} K}.$$

This completes the proof.  $\square$

## F PROOFS OF THE TECHNICAL LEMMAS

### F.1 PROOF OF LEMMA 1

Let  $\bar{x}^{k+1} := x^k - \mathbf{D} \cdot \nabla f(x^k)$ . Since  $f$  has matrix  $\mathbf{L}$ -Lipschitz gradient,  $f$  is also  $\mathbf{L}$ -smooth. From the  $\mathbf{L}$ -smoothness of  $f$ , we have

$$\begin{aligned} f(x^{k+1}) &\leq f(x^k) + \langle \nabla f(x^k), x^{k+1} - x^k \rangle + \frac{1}{2} \langle x^{k+1} - x^k, \mathbf{L}(x^{k+1} - x^k) \rangle \\ &= f(x^k) + \langle \nabla f(x^k) - g^k, x^{k+1} - x^k \rangle + \langle g^k, x^{k+1} - x^k \rangle + \frac{1}{2} \langle x^{k+1} - x^k, \mathbf{L}(x^{k+1} - x^k) \rangle. \end{aligned}$$

We can merge the last two terms and obtain,

$$\begin{aligned} f(x^{k+1}) &\leq f(x^k) + \langle \nabla f(x^k) - g^k, -\mathbf{D} \cdot g^k \rangle - \langle x^{k+1} - x^k, \mathbf{D}^{-1}(x^{k+1} - x^k) \rangle \\ &\quad + \frac{1}{2} \langle x^{k+1} - x^k, \mathbf{L}(x^{k+1} - x^k) \rangle \\ &= f(x^k) + \langle \nabla f(x^k) - g^k, -\mathbf{D} \cdot g^k \rangle - \left\langle x^{k+1} - x^k, \left( \mathbf{D}^{-1} - \frac{1}{2} \mathbf{L} \right) (x^{k+1} - x^k) \right\rangle. \end{aligned}$$

We add and subtract  $\langle \nabla f(x^k) - g^k, \mathbf{D} \cdot g^k \rangle$ ,

$$\begin{aligned} f(x^{k+1}) &\leq f(x^k) + \langle \nabla f(x^k) - g^k, \mathbf{D}(\nabla f(x^k) - g^k) \rangle - \langle \nabla f(x^k) - g^k, \mathbf{D} \cdot \nabla f(x^k) \rangle \\ &\quad - \left\langle x^{k+1} - x^k, \left( \mathbf{D}^{-1} - \frac{1}{2} \mathbf{L} \right) (x^{k+1} - x^k) \right\rangle \\ &= f(x^k) + \|\nabla f(x^k) - g^k\|_{\mathbf{D}}^2 - \langle x^{k+1} - \bar{x}^{k+1}, \mathbf{D}^{-1}(x^k - \bar{x}^{k+1}) \rangle \\ &\quad - \left\langle x^{k+1} - x^k, \left( \mathbf{D}^{-1} - \frac{1}{2} \mathbf{L} \right) (x^{k+1} - x^k) \right\rangle. \end{aligned}$$

Decomposing the term  $\langle x^{k+1} - \bar{x}^{k+1}, \mathbf{D}^{-1} (x^k - \bar{x}^{k+1}) \rangle$ , we get

$$\begin{aligned} f(x^{k+1}) &\leq f(x^k) + \|\nabla f(x^k) - g^k\|_{\mathbf{D}}^2 - \left\langle x^{k+1} - x^k, \left( \mathbf{D}^{-1} - \frac{1}{2} \mathbf{L} \right) (x^{k+1} - x^k) \right\rangle \\ &\quad - \frac{1}{2} \left( \|x^{k+1} - \bar{x}^{k+1}\|_{\mathbf{D}^{-1}}^2 + \|x^k - \bar{x}^{k+1}\|_{\mathbf{D}^{-1}}^2 - \|x^{k+1} - x^k\|_{\mathbf{D}^{-1}}^2 \right). \end{aligned}$$

Plugging in the definition of  $x^{k+1}, \bar{x}^{k+1}$ , we get

$$\begin{aligned} f(x^{k+1}) &\leq f(x^k) + \|\nabla f(x^k) - g^k\|_{\mathbf{D}}^2 - \|x^{k+1} - x^k\|_{\mathbf{D}^{-1} - \frac{1}{2} \mathbf{L}}^2 \\ &\quad - \frac{1}{2} \left( \|\mathbf{D}(\nabla f(x^k) - g^k)\|_{\mathbf{D}^{-1}}^2 + \|\mathbf{D} \cdot \nabla f(x^k)\|_{\mathbf{D}^{-1}}^2 - \|x^{k+1} - x^k\|_{\mathbf{D}^{-1}}^2 \right) \\ &= f(x^k) + \|\nabla f(x^k) - g^k\|_{\mathbf{D}}^2 - \|x^{k+1} - x^k\|_{\mathbf{D}^{-1} - \frac{1}{2} \mathbf{L}}^2 \\ &\quad - \frac{1}{2} \left( \|\nabla f(x^k) - g^k\|_{\mathbf{D}}^2 + \|\nabla f(x^k)\|_{\mathbf{D}}^2 - \|x^{k+1} - x^k\|_{\mathbf{D}^{-1}}^2 \right). \end{aligned}$$

Rearranging terms we get,

$$\begin{aligned} f(x^{k+1}) &\leq f(x^k) - \frac{1}{2} \|\nabla f(x^k)\|_{\mathbf{D}}^2 + \frac{1}{2} \|g^k - \nabla f(x^k)\|_{\mathbf{D}}^2 - \|x^{k+1} - x^k\|_{\mathbf{D}^{-1} - \frac{1}{2} \mathbf{L}}^2 + \frac{1}{2} \|x^{k+1} - x^k\|_{\mathbf{D}^{-1}}^2 \\ &= f(x^k) - \frac{1}{2} \|\nabla f(x^k)\|_{\mathbf{D}}^2 + \frac{1}{2} \|g^k - \nabla f(x^k)\|_{\mathbf{D}}^2 - \frac{1}{2} \|x^{k+1} - x^k\|_{\mathbf{D}^{-1} - \mathbf{L}}^2. \end{aligned}$$

This completes the proof.

## F.2 PROOF OF LEMMA 2

The definition of the weighted norm yields

$$\begin{aligned} \mathbb{E} \left[ \| \mathbf{S} t - t \|_{\mathbf{D}}^2 \right] &= \mathbb{E} [\langle t, (\mathbf{S} - \mathbf{I}_d) \mathbf{D} (\mathbf{S} - \mathbf{I}_d) t \rangle] \\ &= \langle t, \mathbb{E} [(\mathbf{S} - \mathbf{I}_d) \mathbf{D} (\mathbf{S} - \mathbf{I}_d)] t \rangle \\ &= \left\langle t, \mathbf{L}^{-\frac{1}{2}} \cdot \mathbb{E} \left[ \mathbf{L}^{\frac{1}{2}} (\mathbf{S} - \mathbf{I}_d) \mathbf{D} (\mathbf{S} - \mathbf{I}_d) \mathbf{L}^{\frac{1}{2}} \right] \cdot \mathbf{L}^{-\frac{1}{2}} t \right\rangle \\ &= \left\langle \mathbf{L}^{-\frac{1}{2}} t, \mathbb{E} \left[ \mathbf{L}^{\frac{1}{2}} (\mathbf{S} - \mathbf{I}_d) \mathbf{D} (\mathbf{S} - \mathbf{I}_d) \mathbf{L}^{\frac{1}{2}} \right] \cdot \mathbf{L}^{-\frac{1}{2}} t \right\rangle \\ &\leq \lambda_{\max} \left( \mathbb{E} \left[ \mathbf{L}^{\frac{1}{2}} (\mathbf{S} - \mathbf{I}_d) \mathbf{D} (\mathbf{S} - \mathbf{I}_d) \mathbf{L}^{\frac{1}{2}} \right] \right) \left\| \mathbf{L}^{-\frac{1}{2}} t \right\|^2 \\ &= \lambda_{\max} \left( \mathbf{L}^{\frac{1}{2}} (\mathbb{E} [\mathbf{S} \mathbf{D} \mathbf{S}] - \mathbf{D}) \mathbf{L}^{\frac{1}{2}} \right) \cdot \|t\|_{\mathbf{L}^{-1}}^2 \end{aligned}$$

This completes the proof.

## F.3 PROOF OF LEMMA 3

Let  $\bar{x}^{k+1} = x^k - \mathbf{D} \cdot \nabla f(x^k)$ , we start with the definition of  $\mathbf{L}$ -smoothness. Notice that  $\mathbf{L}$ -smoothness of  $f$  is a direct result of matrix  $\mathbf{L}$ -Lipschitz gradient of  $f$ .

$$\begin{aligned} f(x^{k+1}) &\leq f(x^k) + \langle \nabla f(x^k), x^{k+1} - x^k \rangle + \frac{1}{2} \langle x^{k+1} - x^k, \mathbf{L}(x^{k+1} - x^k) \rangle \\ &= f(x^k) + \langle \nabla f(x^k) - \mathbf{D}^{-1} \cdot g^k, x^{k+1} - x^k \rangle + \langle \mathbf{D}^{-1} \cdot g^k, x^{k+1} - x^k \rangle \\ &\quad + \frac{1}{2} \langle x^{k+1} - x^k, \mathbf{L}(x^{k+1} - x^k) \rangle \\ &= f(x^k) + \langle \nabla f(x^k) - \mathbf{D}^{-1} \cdot g^k, -g^k \rangle - \langle x^{k+1} - x^k, \mathbf{D}^{-1}(x^{k+1} - x^k) \rangle \\ &\quad + \frac{1}{2} \langle x^{k+1} - x^k, \mathbf{L}(x^{k+1} - x^k) \rangle. \end{aligned}$$

Simplifying the above inner-products we have,

$$f(x^{k+1}) \leq f(x^k) + \langle \nabla f(x^k) - \mathbf{D}^{-1} \cdot g^k, -g^k \rangle - \left\langle x^{k+1} - x^k, \left( \mathbf{D}^{-1} - \frac{1}{2} \mathbf{L} \right) (x^{k+1} - x^k) \right\rangle.$$

We then add and subtract  $\langle \nabla f(x^k) - \mathbf{D}^{-1} \cdot g^k, \mathbf{D} \cdot \nabla f(x^k) - g^k \rangle$ , and get

$$\begin{aligned} f(x^{k+1}) &\leq f(x^k) + \langle \nabla f(x^k) - \mathbf{D}^{-1} \cdot g^k, \mathbf{D} \cdot \nabla f(x^k) - g^k \rangle - \langle \nabla f(x^k) - \mathbf{D}^{-1} \cdot g^k, \mathbf{D} \cdot \nabla f(x^k) \rangle \\ &\quad - \left\langle x^{k+1} - x^k, \left( \mathbf{D}^{-1} - \frac{1}{2} \mathbf{L} \right) (x^{k+1} - x^k) \right\rangle \\ &= f(x^k) + \|\nabla f(x^k) - \mathbf{D}^{-1} \cdot g^k\|_{\mathbf{D}}^2 - \langle \mathbf{D}^{-1}(x^{k+1} - \bar{x}^{k+1}), x^k - \bar{x}^{k+1} \rangle \\ &\quad - \left\langle x^{k+1} - x^k, \left( \mathbf{D}^{-1} - \frac{1}{2} \mathbf{L} \right) (x^{k+1} - x^k) \right\rangle. \end{aligned}$$

Decomposing the inner product term we get,

$$\begin{aligned} f(x^{k+1}) &\leq f(x^k) + \|\mathbf{D}^{-1}(\mathbf{D} \cdot \nabla f(x^k) - g^k)\|_{\mathbf{D}}^2 - \left\langle x^{k+1} - x^k, \left( \mathbf{D}^{-1} - \frac{1}{2} \mathbf{L} \right) (x^{k+1} - x^k) \right\rangle \\ &\quad - \frac{1}{2} \left( \|x^{k+1} - \bar{x}^{k+1}\|_{\mathbf{D}^{-1}}^2 + \|x^k - \bar{x}^{k+1}\|_{\mathbf{D}^{-1}}^2 - \|x^{k+1} - x^k\|_{\mathbf{D}^{-1}}^2 \right) \\ &= f(x^k) + \|\mathbf{D} \cdot \nabla f(x^k) - g^k\|_{\mathbf{D}^{-1}}^2 - \|x^{k+1} - x^k\|_{\mathbf{D}^{-1} - \frac{1}{2} \mathbf{L}}^2 \\ &\quad - \frac{1}{2} \left( \|\mathbf{D} \cdot \nabla f(x^k) - g^k\|_{\mathbf{D}^{-1}}^2 + \|\mathbf{D} \cdot \nabla f(x^k)\|_{\mathbf{D}^{-1}}^2 - \|x^{k+1} - x^k\|_{\mathbf{D}^{-1}}^2 \right). \end{aligned}$$

Rearranging terms we get,

$$f(x^{k+1}) \leq f(x^k) + \frac{1}{2} \|\mathbf{D} \nabla f(x^k) - g^k\|_{\mathbf{D}^{-1}}^2 - \frac{1}{2} \|\nabla f(x^k)\|_{\mathbf{D}}^2 - \frac{1}{2} \|x^{k+1} - x^k\|_{\mathbf{D}^{-1} - \mathbf{L}}^2.$$

This completes the proof.

#### F.4 PROOF OF LEMMA 4

We start with

$$\begin{aligned} \mathbb{E} \left[ \|\mathbf{T} \mathbf{D} t - \mathbf{D} t\|_{\mathbf{D}^{-1}}^2 \right] &= \mathbb{E} \left[ \|\mathbf{T} - \mathbf{I}_d\|_{\mathbf{D}^{-1}}^2 \right] \\ &= \langle t, \mathbb{E} [\mathbf{D}(\mathbf{T} - \mathbf{I}_d) \mathbf{D}^{-1}(\mathbf{T} - \mathbf{I}_d) \mathbf{D}] \cdot t \rangle \\ &= \langle t, \mathbf{D} (\mathbb{E} [\mathbf{T} \mathbf{D}^{-1} \mathbf{T}] - \mathbf{D}^{-1}) \mathbf{D} \cdot t \rangle \\ &= \left\langle \mathbf{L}^{-\frac{1}{2}} t, \mathbf{L}^{\frac{1}{2}} \mathbf{D} (\mathbb{E} [\mathbf{T} \mathbf{D}^{-1} \mathbf{T}] - \mathbf{D}^{-1}) \mathbf{D} \mathbf{L}^{\frac{1}{2}} \cdot \mathbf{L}^{-\frac{1}{2}} t \right\rangle \\ &\leq \lambda_{\max} \left( \mathbf{L}^{\frac{1}{2}} \mathbf{D} \mathbb{E} [\mathbf{T} \mathbf{D}^{-1} \mathbf{T}] \mathbf{D} \mathbf{L}^{\frac{1}{2}} - \mathbf{L}^{\frac{1}{2}} \mathbf{D} \mathbf{L}^{\frac{1}{2}} \right) \cdot \left\| \mathbf{L}^{-\frac{1}{2}} t \right\|^2 \\ &= \lambda_{\max} \left( \mathbf{L}^{\frac{1}{2}} \mathbf{D} \mathbb{E} [\mathbf{T} \mathbf{D}^{-1} \mathbf{T}] \mathbf{D} \mathbf{L}^{\frac{1}{2}} - \mathbf{L}^{\frac{1}{2}} \mathbf{D} \mathbf{L}^{\frac{1}{2}} \right) \cdot \|t\|_{\mathbf{L}^{-1}}^2 \end{aligned}$$

This completes the proof.

## G EXPERIMENTS

In this section, we conduct numerical experiments on the performance of det-MARINA. The code for the experiments can be found in <https://anonymous.4open.science/r/detMARINA-7D05/>.

## G.1 THE SETTING

We first state the experiment setting. We are interested in the following logistic regression problem with a non-convex regularizer. The objective is given as

$$f(x) = \frac{1}{n} \sum_{i=1}^n f_i(x); \quad f_i(x) = \frac{1}{m_i} \sum_{j=1}^{m_i} \log \left( 1 + e^{-b_{i,j} \cdot \langle a_{i,j}, x \rangle} \right) + \lambda \cdot \sum_{t=1}^d \frac{x_t^2}{1 + x_t^2},$$

where  $x \in \mathbb{R}^d$  is the model,  $(a_{i,j}, b_{i,j}) \in \mathbb{R}^d \times \{-1, 1\}$  is one data point in the dataset of client  $i$  whose size is  $m_i$ . The constant  $\lambda > 0$  is the coefficient of the regularizer. Larger  $\lambda$  means the model is more regular. For each function  $f_i$ , its Hessian can be upper bounded by

$$\mathbf{L}_i = \frac{1}{m_i} \sum_{i=1}^{m_i} \frac{a_i a_i^\top}{4} + 2\lambda \cdot \mathbf{I}_d;$$

and, therefore, the Hessian of  $f$  is bounded by

$$\mathbf{L} = \frac{1}{\sum_{i=1}^n m_i} \sum_{i=1}^n \sum_{j=1}^{m_i} \frac{a_i a_i^\top}{4} + 2\lambda \cdot \mathbf{I}_d.$$

Due to Proposition 1, it immediately follows that  $f_i$  and  $f$  satisfy Definition 1 with  $\mathbf{L}_i \in \mathbb{S}_{++}^d$  and  $\mathbf{L} \in \mathbb{S}_{++}^d$ , respectively. In the following subsections, we perform several numerical experiments comparing the performance of DCGD, det-CGD, MARINA and det-MARINA. The datasets we used are from the LibSVM repository (Chang & Lin (2011).)

## G.2 IMPROVEMENTS ON MARINA

The purpose of this experiment is to compare the iteration complexity of MARINA with det-MARINA using Rand- $\tau$  sketches, thus showing improvements of det-MARINA upon MARINA. Using the Theorem C.1 from Gorbunov et al. (2021), we can deduce the optimal stepsize for MARINA is

$$\gamma_1 = \frac{1}{L \left( 1 + \sqrt{\frac{(1-p)\omega}{pn}} \right)}, \quad (65)$$

where  $\omega$  is the quantization coefficient. In particular, for the Rand- $\tau$  compressor is  $\frac{d}{\tau} - 1$ . For the full definition see (Gorbunov et al., 2021, Section 1.3). The stepsize for det-MARINA is determined through Corollary 1. We use the notation  $\mathbf{D}_W^*$  to denote the optimal stepsize for each choice of  $\mathbf{W}$ , here we list some of the optimal stepsizes for different  $\mathbf{W}$ , which are used in the experiment section. We have

$$\begin{aligned} \mathbf{D}_{\mathbf{I}_d}^* &= \frac{2}{1 + \sqrt{1 + 4\alpha\beta \frac{1}{\lambda_{\max}(\mathbf{L})} \cdot \omega}} \cdot \frac{\mathbf{I}_d}{\lambda_{\max}(\mathbf{L})}, \\ \mathbf{D}_{\mathbf{L}^{-1}}^* &= \frac{2}{1 + \sqrt{1 + 4\alpha\beta \cdot \lambda_{\max}(\mathbb{E}[\mathbf{S}_i^k \mathbf{L}^{-1} \mathbf{S}_i^k] - \mathbf{L}^{-1})}} \cdot \mathbf{L}^{-1}, \\ \mathbf{D}_{\text{diag}^{-1}(\mathbf{L})}^* &= \frac{2}{1 + \sqrt{1 + 4\alpha\beta \cdot \lambda_{\max}(\mathbb{E}[\mathbf{S}_i^k \text{diag}^{-1}(\mathbf{L}) \mathbf{S}_i^k] - \text{diag}^{-1}(\mathbf{L}))}} \cdot \text{diag}^{-1}(\mathbf{L}). \end{aligned} \quad (66)$$

In this experiment, we aim to compare det-MARINA with stepsize  $\mathbf{D}_{\mathbf{L}^{-1}}^*$  to standard MARINA with optimal scalar stepsize. Rand- $\tau$  compressor is used in the comparison. Throughout the experiments,  $\lambda$  is fixed at 0.3. We set the  $x$ -axis to be the number of iterations, while  $y$ -axis to be the expectation of the corresponding matrix norm of the gradient of the function, which is defined as

$$G_{K,D} = \mathbb{E} \left[ \left\| \nabla f(\tilde{x}^K) \right\|_{D/\det(D)^{1/d}}^2 \right]. \quad (67)$$

As it is illustrated in Figure 2, det-MARINA always has a faster convergence rate compared to MARINA if they use the same sketch, this justifies the result we have in Corollary 2. Notice that in some cases, det-MARINA with rand-1 sketch even outperforms standard MARINA with rand-80 sketch. This further demonstrates the superiority of matrix stepsizes and smoothness over the standard scalar setting.

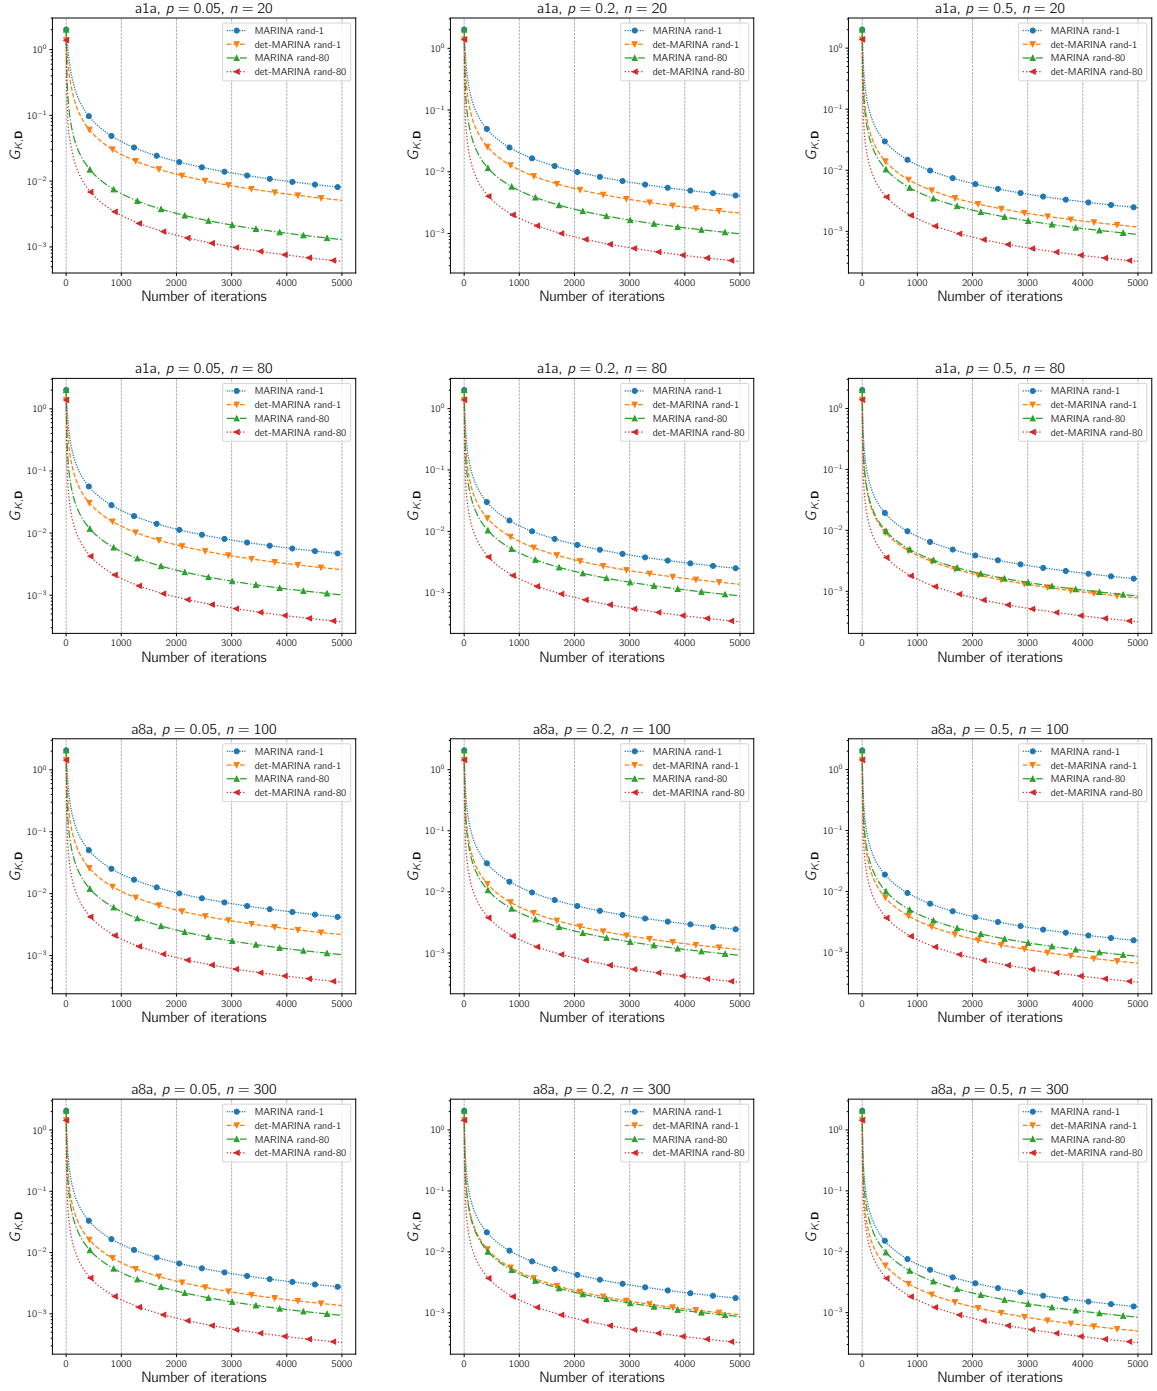

Figure 2: Comparison of  $\det$ -MARINA with matrix stepsize  $D_{L-1}^*$  and MARINA with optimal scalar stepsize  $\gamma_1$  using different  $\text{rand-}\tau$  sketches.  $\lambda = 0.3$  is fixed throughout the experiments. Optimal stepsize is calculated in each case with respect to the sketch used. The  $x$ -axis denotes the number of iterations while the notation  $G_{K,D}$  for the  $y$ -axis is defined in (67), which is the averaged matrix norm of the gradient. The notation  $p$  in the title denotes the probability used in the two algorithms,  $n$  denotes the number of clients in each setting.



### G.3 IMPROVEMENTS ON NON VARIANCE REDUCED METHODS

In this section, we compare two non-variance reduced methods, distributed compressed gradient descent (DCGD) and distributed  $\det$ -CGD with two variance reduced methods, MARINA and  $\det$ -MARINA. Rand-1 sketch is used throughout this experiment for all the algorithms, for non variance reduced method  $\varepsilon^2$  is fixed at 0.01 in order to determine the optimal stepsize. The purpose of this experiment is to show the advantages of variance reduced methods over non variance reduced methods. DCGD was initially proposed in [Khirirat et al. \(2018\)](#). Later on DIANA was proposed in [Mishchenko et al. \(2019\)](#) and then combined with variance reduction technique. Recently [Shulgin & Richtárik \(2022\)](#) proposed DCGD-SHIFT, which is a shifted version of DCGD and proved its convergence in the (strongly) convex setting. A general analysis on SGD type methods in the non-convex world is provided by [Khaled & Richtárik \(2020\)](#), including DCGD and DCGD-SHIFT. In our case, in order to determine the optimal scalar stepsize for DCGD, one can simply use Proposition 4 in [Khaled & Richtárik \(2020\)](#). One can check that in order to satisfy  $\min_{0 \leq k \leq K-1} \mathbb{E} \left[ \|\nabla f(x^k)\|^2 \right] \leq \varepsilon^2$  the stepsize condition for DCGD in the non-convex case reduces to

$$\gamma_2 \leq \min \left\{ \frac{1}{L}, \sqrt{\frac{n}{\omega L L_{\max} K}}, \frac{n\varepsilon^2}{4L L_{\max} \omega \cdot \Delta^*} \right\}, \quad (68)$$

where  $L$  is the smoothness constant for  $f$ ,  $L_i$  is the smoothness constant for  $f_i$ ,  $L_{\max} = \max_i L_i$ ,  $K$  is the total number of iterations,  $\Delta^* = f(x^*) - \frac{1}{n} \sum_{i=1}^n f_i(x^*)$ . The constant  $\omega$  is associated with the compressor used in the algorithm, for Rand- $\tau$  sketch, it is  $\frac{d}{\tau} - 1$ . For distributed  $\det$ -CGD according to [Li et al. \(2023\)](#), the stepsize condition in order to satisfy  $\min_{0 \leq k \leq K-1} \mathbb{E} \left[ \|\nabla f(x)\|_{\mathbf{D}/\det(\mathbf{D})^{1/d}}^2 \right] \leq \varepsilon^2$  is

$$\mathbf{D} \mathbf{L} \mathbf{D} \preceq \mathbf{D}, \quad \lambda_{\mathbf{D}} \leq \min \left\{ \frac{n}{K}, \frac{n\varepsilon^2}{4\Delta^*} \det(\mathbf{D})^{1/d} \right\}, \quad (69)$$

where  $\lambda_{\mathbf{D}}$  is defined as

$$\lambda_{\mathbf{D}} = \max_i \left\{ \lambda_{\max} \left( \mathbb{E} \left[ \mathbf{L}_i^{\frac{1}{2}} (\mathbf{S}_i^k - \mathbf{I}_d) \mathbf{D} \mathbf{L} \mathbf{D} (\mathbf{S}_i^k - \mathbf{I}_d) \mathbf{L}_i^{\frac{1}{2}} \right] \right) \right\}. \quad (70)$$

In general cases, there is no easy way to find a optimal stepsize matrix  $\mathbf{D}$  satisfying (69), alternatively, we choose the optimal diagonal stepsize  $\mathbf{D}_3^*$  in this case similarly to [Li et al. \(2023\)](#). The stepsize condition for MARINA has already been described by (65). Note that we only consider MARINA, but not DIANA or DCGD-SHIFT, because DIANA and DCGD-SHIFT offer suboptimal rates compared to MARINA in the non-convex setting. For  $\det$ -MARINA, we fix  $\mathbf{W} = \mathbf{L}^{-1}$ , and use  $\mathbf{D}_{\mathbf{L}^{-1}}^*$  as the stepsize matrix. In theory,  $\det$ -MARINA in this case should always outperform MARINA in terms of iteration complexity.

In Figure 3, in each plot, we observe that  $\det$ -MARINA outperforms MARINA and the rest of the non-variance reduced methods. This is expected, since our theory confirms that  $\det$ -MARINA indeed has a better rate compared to MARINA, and the stepsizes of the non-variance reduced methods are negatively affected by the neighborhood. When  $p$  is reasonably large, the variance reduced methods considered here outperform the non-variance reduced methods. In this experiment we consider only the comparison involving  $\det$ -CGD.

### G.4 IMPROVEMENTS ON $\det$ -CGD

In this section, we compare  $\det$ -CGD in the distributed case with  $\det$ -MARINA, which are both algorithms using matrix stepsizes and matrix smoothness. The purpose of this experiment is to show that  $\det$ -MARINA improves on the current state of the art matrix stepsize compressed gradient method when the objective function is non-convex. Throughout the experiment,  $\lambda = 0.3$  is fixed, and for  $\det$ -CGD,  $\varepsilon^2 = 0.01$  is fixed in order to determine its stepsize. For a thorough comparison, we select the stepsize for  $\det$ -CGD in the following way. Let us denote the stepsize as  $\mathbf{D} = \gamma_{\mathbf{W}} \cdot \mathbf{W}$ , where  $\gamma_{\mathbf{W}} \in \mathbb{R}_{++}$ ,  $\mathbf{W} \in \mathbb{S}_{++}^d$ . We first fix a matrix  $\mathbf{W}$ , in this case, we pick  $\mathbf{W}$  from the set  $\{\mathbf{L}^{-1}, \text{diag}^{-1}(\mathbf{L}), \mathbf{I}_d\}$ , and then we determine the optimal scaling  $\gamma_{\mathbf{W}}$  for each case using the condition given in [Li et al. \(2023\)](#) (see (69) and (70)). Then, we denote the matrix stepsizes for  $\det$ -CGD

$$\mathbf{D}_1 = \gamma_{\mathbf{I}_d} \cdot \mathbf{I}_d, \quad \mathbf{D}_2 = \gamma_{\text{diag}^{-1}(\mathbf{L})} \cdot \text{diag}^{-1}(\mathbf{L}), \quad \mathbf{D}_3 = \gamma_{\mathbf{L}^{-1}} \cdot \mathbf{L}^{-1}. \quad (71)$$

For  $\det$ -MARINA, we use the stepsize  $\mathbf{D}_{\mathbf{L}^{-1}}^*$ , which is described in (66). In this experiment, we compare  $\det$ -CGD using three stepsizes  $\mathbf{D}_1, \mathbf{D}_2, \mathbf{D}_3$  with  $\det$ -MARINA using stepsize  $\mathbf{D}_{\mathbf{L}^{-1}}^*$ .

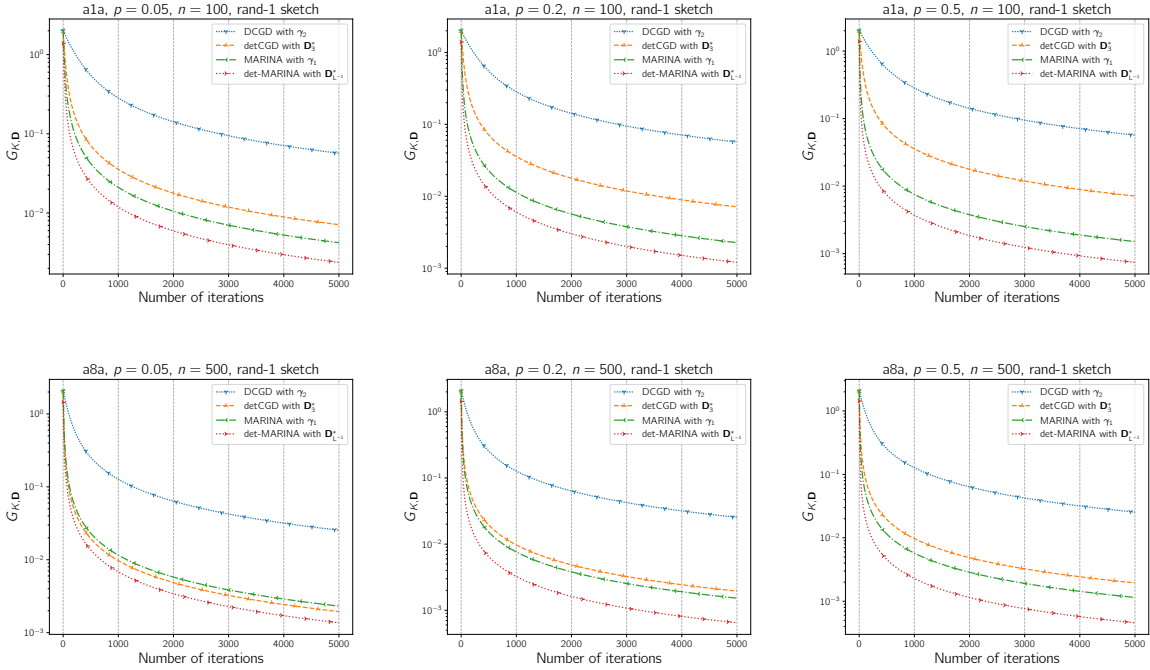

Figure 3: Comparison of DCGD with optimal scalar stepsize  $\gamma_2$ , det-CGD with optimal diagonal stepsize  $D_3^*$ , MARINA with optimal scalar stepsize  $\gamma_1$ , and det-MARINA with optimal stepsize  $D_{L-1}^*$  with respect to  $W = L^{-1}$ . In each case, probability  $p$  is chosen the set  $\{0.05, 0.2, 0.5\}$  for MARINA and det-MARINA.  $\lambda = 0.3$  is fixed throughout the experiment. The notation  $n$  in the title indicates the number of clients in each case.

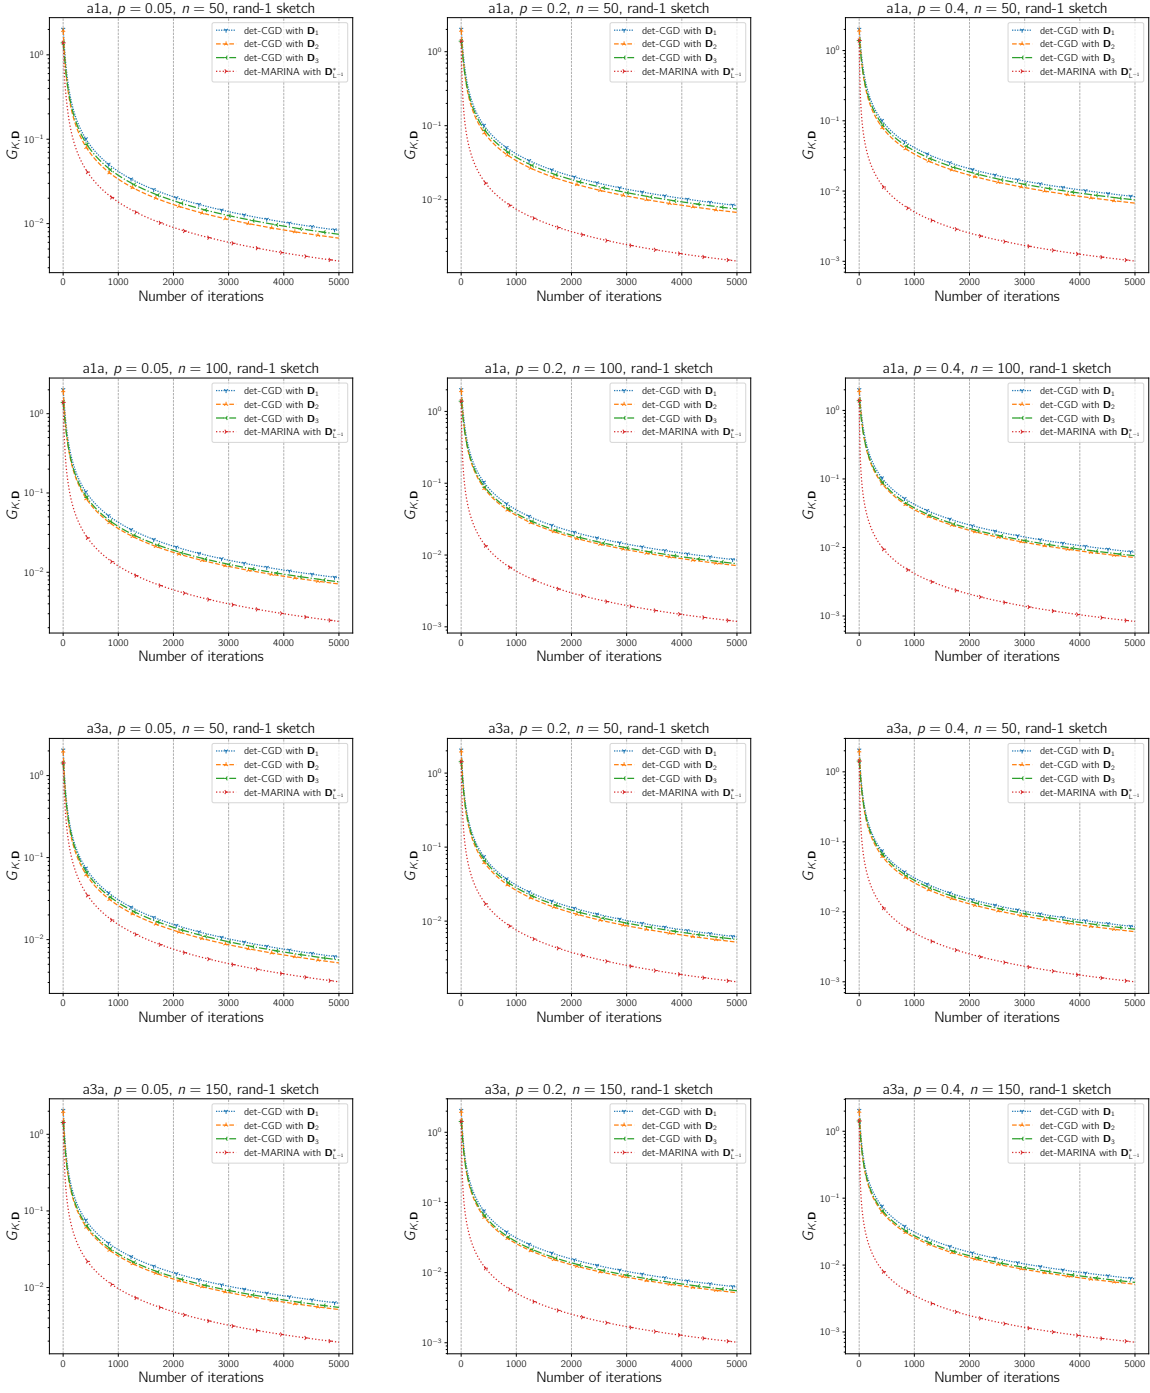

Figure 4: Comparison of det-CGD with matrix stepsize  $D_1$ ,  $D_2$  and  $D_3$  and det-MARINA with optimal matrix stepsize with respect to  $W = L^{-1}$ . The stepsizes  $\{D_i\}_{i=1}^3$  are described in (71). Throughout the experiment  $\varepsilon^2$  is fixed at 0.01, the notation  $p$  in the title refers to the probability for det-MARINA,  $n$  denotes the number of clients considered, rand-1 sketch is used in all cases for all the algorithms.

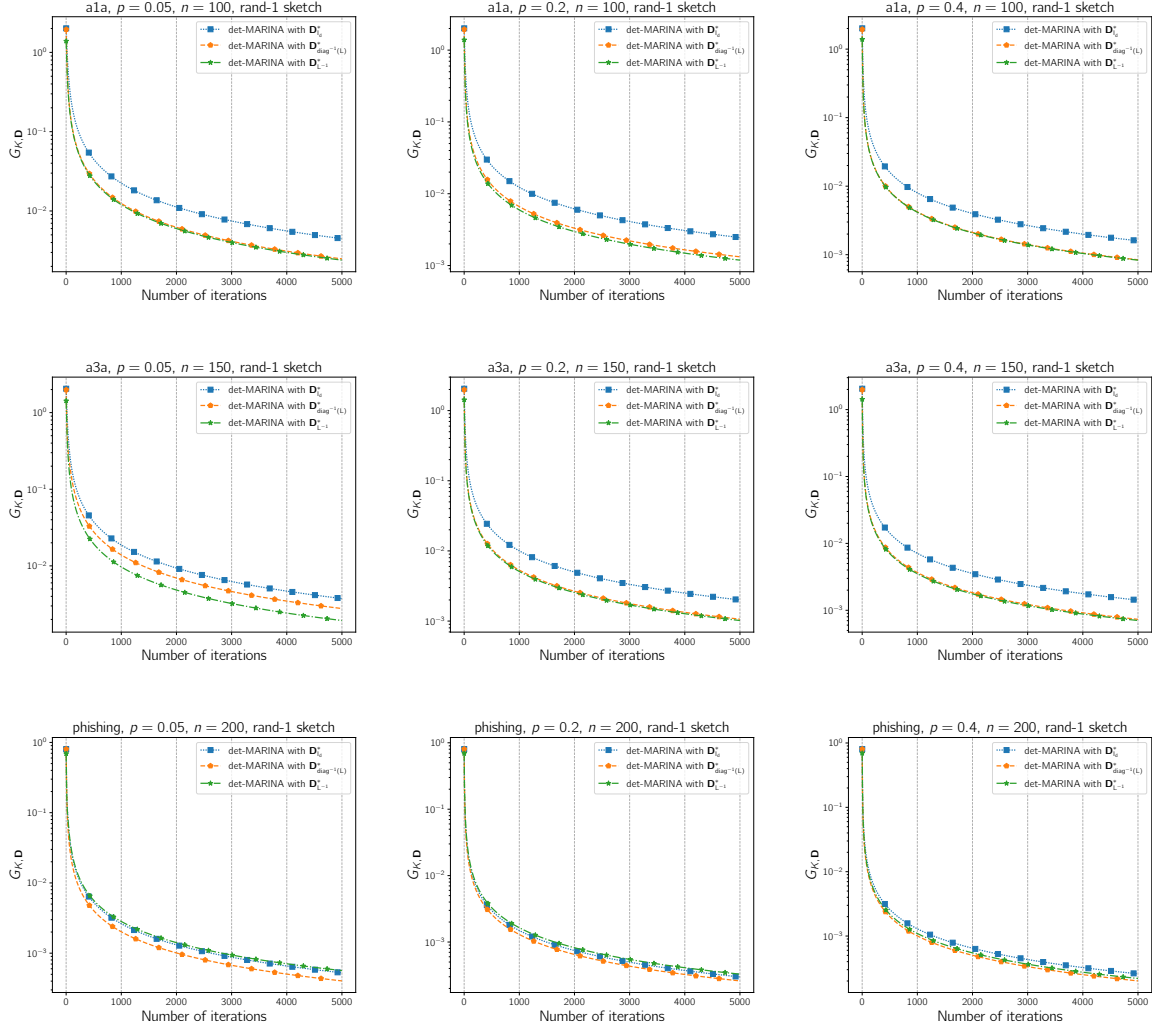

Figure 5: Comparison of det-MARINA with matrix stepsize  $D_{I_d}^*$ ,  $D_{\text{diag}^{-1}(L)}^*$  and  $D_{L-1}^*$ . The stepsizes are defined in (66). Throughout the experiment,  $\lambda = 0.3$  is fixed, rand-1 sketch is used in all cases. The notation  $p$  in the title indicates the probability of sending the true gradient for det-MARINA,  $n$  denotes the number of clients considered.

From Figure 4, it is clear that det-MARINA outperforms det-CGD with all matrix optimal stepsizes with respect to a fixed  $\mathbf{W}$  considered here. This is expected, since the convergence rate of non-variance reduced methods are affected by its neighborhood. This experiment demonstrates the advantages of det-MARINA over det-CGD, and is also supported by our theory. Notice that though different  $\mathbf{W}$  are considered for det-CGD, their convergence rates are similar, which is also mentioned by Li et al. (2023).

## G.5 COMPARING DIFFERENT STEPSIZE CHOICES

This experiment is designed to see how det-MARINA works under different stepsize choices. As it is mentioned in Appendix G.2, for each choice of  $\mathbf{W} \in \mathbb{S}_{++}^d$ , an optimal stepsize  $D_{\mathbf{W}}^*$  can be determined. Here we compare det-MARINA using three different stepsize choices  $D_{L-1}^*$ ,  $D_{\text{diag}^{-1}(L)}^*$  and  $D_{I_d}^*$ . These stepsizes are explicitly defined in (66). Throughout the experiment, we fix  $\lambda = 0.3$ , rand-1 sketch is used in all cases.

We can observe from Figure 5 that, in almost all cases  $\text{det-MARINA}$  with stepsize  $D_{\text{diag}^{-1}(L)}^*$  and  $D_{L-1}^*$  outperforms  $\text{det-MARINA}$  with  $D_{I_d}^*$ . As  $\text{det-MARINA}$  with  $D_{I_d}^*$  can be viewed as  $\text{MARINA}$  using scalar stepsize but under matrix Lipschitz gradient assumption, this demonstrates the effectiveness of using a matrix stepsize over the scalar stepsize. However, in Figure 5, there are cases where  $\text{det-MARINA}$  with  $D_{\text{diag}^{-1}(L)}^*$  outperforms  $D_{L-1}^*$ . This tells us the two stepsizes are perhaps incomparable in general cases. This is similar to  $\text{det-CGD}$ , where optimal stepsizes with respect to a subspace associated with a fixed  $W^{-1}$  are incomparable.

## G.6 COMPARING COMMUNICATION COMPLEXITY

In this section, we perform an experiment on how different probabilities  $p$  will affect the overall communication complexity of  $\text{det-MARINA}$ . We use  $D_{L-1}^*$  as the stepsize, which is determined with respect to the sketch used.  $\text{Rand-}\tau$  sketches are used in these experiments, and we vary the minibatch size  $\tau$  to provide a more comprehensive comparison. For  $\text{rand-}\tau$  sketch  $S$  and any  $A \in \mathbb{S}_{++}^d$ , one can show that

$$\mathbb{E}[SAS] = \frac{d}{\tau} \left( \frac{d-\tau}{d-1} \text{diag}(A) + \frac{\tau-1}{d-1} A \right). \quad (72)$$

Combining (72) and (66), we can find out the corresponding matrix stepsize easily. In the experiment, a fixed number of iterations ( $K = 5000$ ) is performed for each  $\text{det-MARINA}$  with the corresponding stepsize.

As it can be observed from Figure 6, in each dataset, the communication complexity tends to increase with the increase of probability  $p$ . However, when the number of iteration is fixed, a larger  $p$  often means a faster rate of convergence. This difference in communication complexity is more obvious when we are using the  $\text{Rand-1}$  sketch. In real federated learning settings, there is often constraints on network bandwidth from clients to the server. Thus, trading off between communication complexity and iteration complexity, i.e. selecting the compression mechanism carefully to guarantee a acceptable speed that satisfies the bandwidth constraints, becomes important.

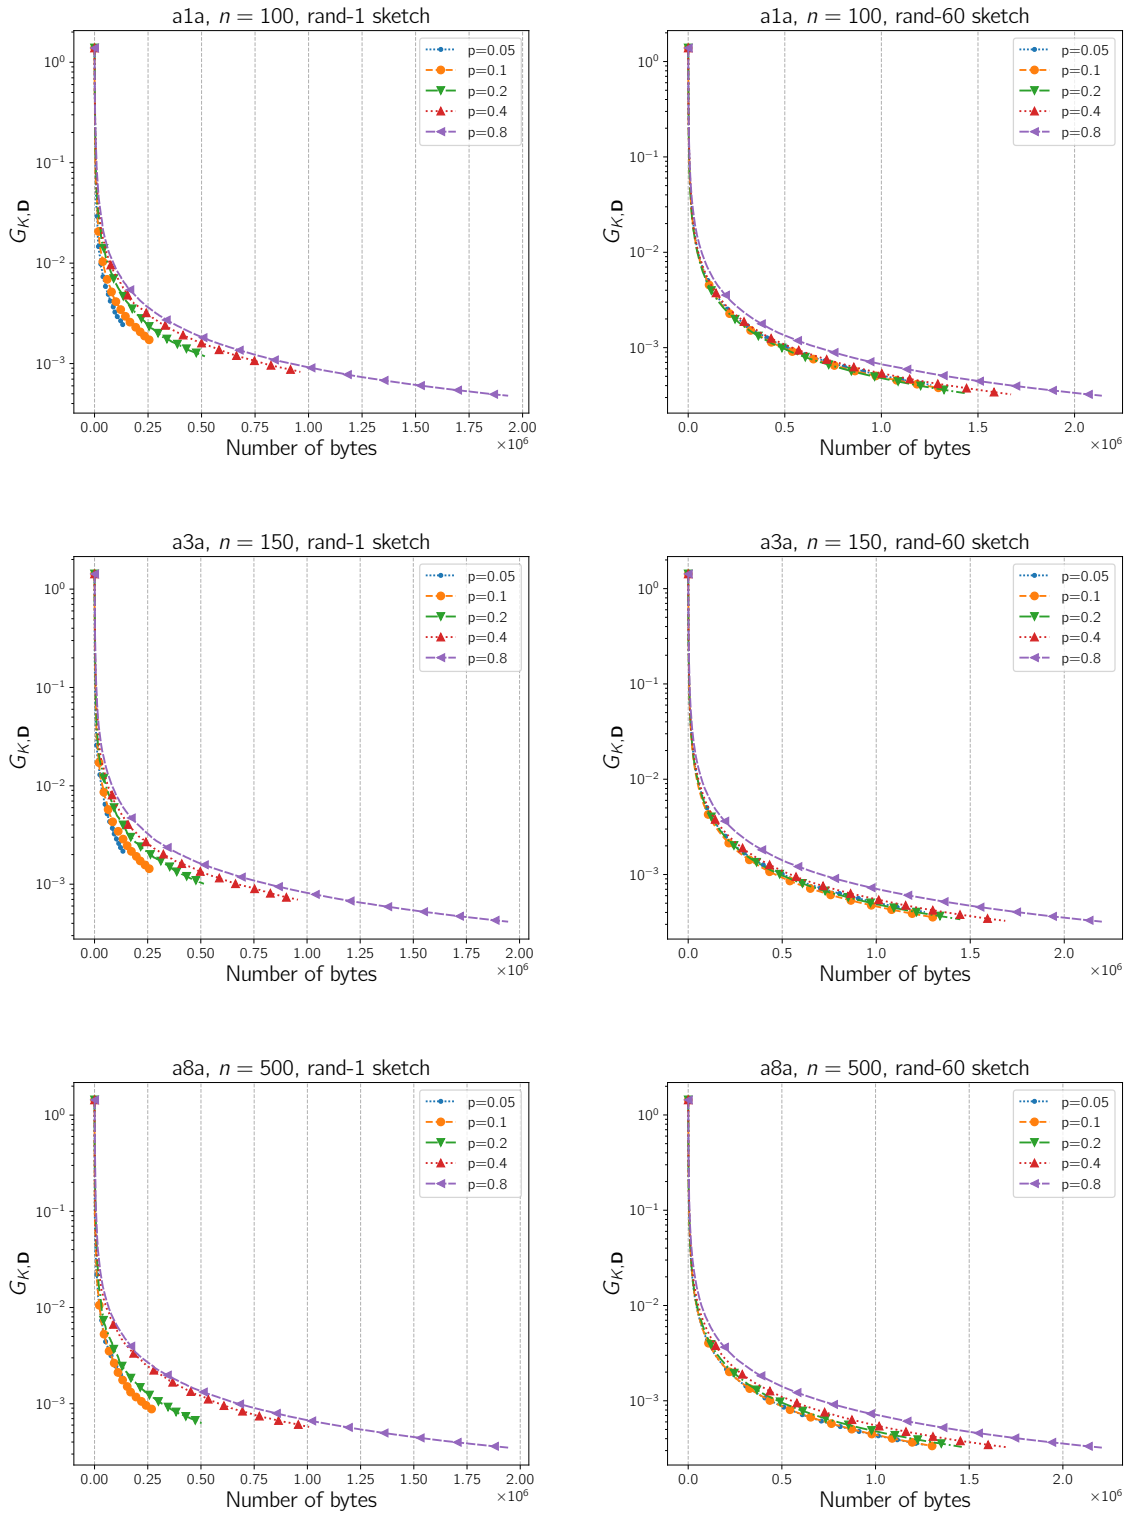

Figure 6: Comparison of det-MARINA with stepsize  $D_{L-1}^*$  using different probability  $p$ . The probability  $p$  here is chosen from the set  $\{0.05, 0.1, 0.2, 0.4, 0.8\}$ . The notation  $n$  in the title denote the number of clients considered. The  $x$ -axis is now the number of bytes sent from a single node to the server. In each case, det-MARINA is run for a fixed number of iterations  $K = 5000$ .
